# Supplementary material for: The Impact of GFP Reporter Gene Transduction and Expression on Metabolomics of Placental Mesenchymal Stem Cells Determined by UHPLC-Q/TOF-MS
Source: Hindawi journal article supplement (doi:10.1155/2017/3167985), 2017-01-01
Supplement: f2 [file 3167985.f2.pdf]

## Supplemental Data

# **The impact of GFP reporter gene transduction and expression on metabolomics of placental mesenchymal stem cells determined by UHPLC-Q/TOF-MS**

Jinfeng Yang<sup>1\*</sup>, Nan Wang<sup>2\*</sup>, Deying Chen<sup>1</sup>, Jiong Yu<sup>1</sup>, Qiaoling Pan<sup>1</sup>, Dan Wang<sup>1</sup>, Jingqi Liu<sup>1</sup>, Xiaowei Shi<sup>3</sup>, Xiaotian Dong<sup>1</sup>, Hongcui Cao<sup>1†</sup>, Liang Li<sup>2</sup>, Lanjuan Li<sup>1</sup>

1 State Key Laboratory for the Diagnosis and Treatment of Infectious Diseases, The First Affiliated Hospital, College of Medicine, Zhejiang University; Collaborative Innovation Center for Diagnosis and Treatment of Infectious Diseases, 79 Qingchun Rd., Hangzhou City 310003, China

2 Collaborative Innovation Center for the Diagnosis and Treatment of Infectious Diseases, Zhejiang University, Hangzhou 310003, China; Department of Chemistry, University of Alberta, Edmonton, Alberta T6G 2G2, Canada

3 Chu Kochen Honors College, Zhejiang University, 866 Yuhangtang Rd., Hangzhou City 310058, China

\* These authors contributed equally to this work.

†Correspondence author:

Hongcui Cao, the State Key Laboratory for Diagnosis and Treatment of Infectious Diseases, The First Affiliated Hospital, College of Medicine, Zhejiang University; Collaborative Innovation Center for Diagnosis and Treatment of Infectious Diseases, 79 Qingchun Rd., Hangzhou City 310003, China. Tel: 86-571-87236451; Fax: 86-571-87236459

E-mail: hccao@zju.edu.cn

**Figure S1.**

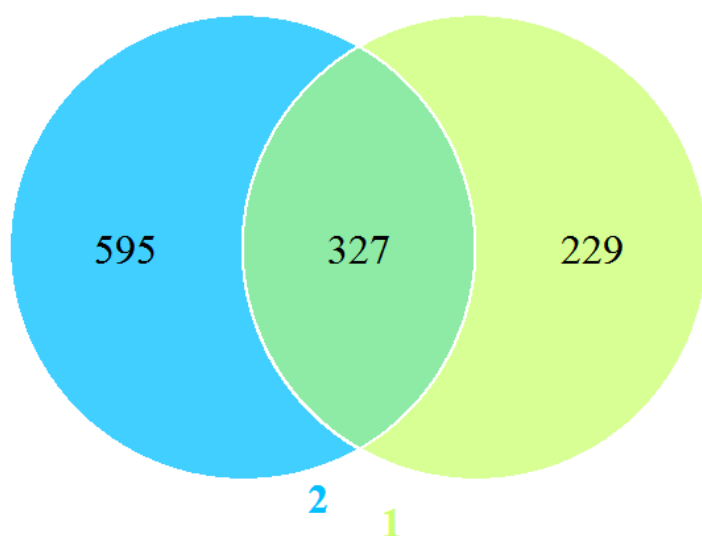

The Venn diagram shows the numbers of peak pairs detected using 9/1 MeOH/CHCl<sub>3</sub> (method 1) and 1/1 MeOH/H<sub>2</sub>O (method 2) as extraction solvent respectively.

**Table S1A.** Identification of cellular metabolites based on the mass and retention time matches against the dansyl standard library.

Supplemental Table S1A. Identification of cellular metabolites based on the mass and retention time matches against the dansyl standard library.

| #  | Input mass | Input RT(min) | Calibrated RT (min) | HMDB.No.  | Name                            | Accurate mass | mz_light | library RT | Mass error ( Da) | RT error (min) |
|----|------------|---------------|---------------------|-----------|---------------------------------|---------------|----------|------------|------------------|----------------|
| 1  | 375.0800   | 3.08          | 1.80                | HMDB00224 | O-Phosphoethanolamine           | 141.0191      | 375.0774 | 2.02       | 0.0026           | 0.22           |
| 2  | 359.0735   | 3.35          | 1.95                | HMDB00251 | Taurine                         | 125.0147      | 359.0730 | 2.24       | 0.0005           | 0.29           |
| 3  | 388.1080   | 3.48          | 2.03                | HMDB00157 | Hypoxanthine + H <sub>2</sub> O | 136.0385      | 388.1098 | 2.12       | 0.0018           | 0.09           |
| 4  | 517.1505   | 3.57          | 2.09                | HMDB00133 | Guanosine                       | 283.0917      | 517.1500 | 2.22       | 0.0005           | 0.13           |
| 5  | 359.0735   | 3.59          | 2.09                | HMDB00251 | Taurine                         | 125.0147      | 359.0730 | 2.24       | 0.0005           | 0.15           |
| 6  | 517.1506   | 3.78          | 2.21                | HMDB00133 | Guanosine                       | 283.0917      | 517.1500 | 2.22       | 0.0006           | 0.01           |
| 7  | 517.1502   | 3.99          | 2.33                | HMDB00133 | Guanosine                       | 283.0917      | 517.1500 | 2.22       | 0.0002           | 0.11           |
| 8  | 408.1709   | 4.03          | 2.35                | HMDB00517 | L-Arginine                      | 174.1117      | 408.1700 | 2.44       | 0.0009           | 0.09           |
| 9  | 403.1427   | 4.19          | 2.45                | HMDB00001 | 1-Methylhistidine               | 169.0851      | 403.1434 | 2.17       | 0.0007           | 0.28           |
| 10 | 403.1427   | 4.19          | 2.45                | HMDB00479 | 3-methyl-histidine              | 169.0851      | 403.1434 | 2.01       | 0.0007           | 0.44           |
| 11 | 408.1705   | 4.37          | 2.73                | HMDB00517 | L-Arginine                      | 174.1117      | 408.1700 | 2.44       | 0.0005           | 0.29           |
| 12 | 366.1125   | 4.45          | 2.87                | HMDB00168 | L-Asparagine                    | 132.0535      | 366.1118 | 3          | 0.0007           | 0.13           |
| 13 | 380.1279   | 4.91          | 3.63                | HMDB00641 | L-Glutamine                     | 146.0691      | 380.1275 | 3.32       | 0.0004           | 0.31           |
| 14 | 380.1279   | 4.91          | 3.63                | HMDB03423 | D-Glutamine                     | 146.0691      | 380.1275 | 3.32       | 0.0004           | 0.31           |
| 15 | 399.1044   | 5.14          | 4.00                | HMDB02005 | Methionine Sulfoxide            | 165.0460      | 399.1043 | 3.72       | 0.0001           | 0.28           |
| 16 | 399.1044   | 5.14          | 4.00                | HMDB02005 | Methionine Sulfoxide - Isomer   | 165.0460      | 399.1043 | 4.2        | 0.0001           | 0.20           |
| 17 | 353.1166   | 5.23          | 4.15                | HMDB00719 | L-Homoserine                    | 119.0582      | 353.1166 | 4.05       | 0.0000           | 0.10           |
| 18 | 339.1030   | 5.23          | 4.15                | HMDB00187 | L-Serine                        | 105.0426      | 339.1009 | 4.4        | 0.0021           | 0.25           |

| #  | Input mass | Input RT(min) | Calibrated RT (min) | HMDB.No.  | Name                          | Accurate mass | mz_light | library RT | Mass error ( Da) | RT error (min) |
|----|------------|---------------|---------------------|-----------|-------------------------------|---------------|----------|------------|------------------|----------------|
| 19 | 399.1046   | 5.41          | 4.44                | HMDB02005 | Methionine Sulfoxide - Isomer | 165.0460      | 399.1043 | 4.2        | 0.0003           | 0.24           |
| 20 | 353.1157   | 5.47          | 4.50                | HMDB00719 | L-Homoserine                  | 119.0582      | 353.1166 | 4.05       | 0.0009           | 0.45           |
| 21 | 339.1016   | 5.58          | 4.61                | HMDB00187 | L-Serine                      | 105.0426      | 339.1009 | 4.4        | 0.0007           | 0.21           |
| 22 | 381.1122   | 5.61          | 4.63                | HMDB00148 | L-Glutamic Acid               | 147.0532      | 381.1115 | 5.05       | 0.0007           | 0.42           |
| 23 | 367.0991   | 5.66          | 4.68                | HMDB00191 | L-Aspartic Acid               | 133.0375      | 367.0958 | 5.16       | 0.0033           | 0.48           |
| 24 | 365.1186   | 5.68          | 4.70                | HMDB00725 | Trans-4-Hydroxyl-L-Proline    | 131.0582      | 365.1166 | 5.17       | 0.0020           | 0.47           |
| 25 | 365.1187   | 5.86          | 4.87                | HMDB00725 | Trans-4-Hydroxyl-L-Proline    | 131.0582      | 365.1166 | 5.17       | 0.0021           | 0.30           |
| 26 | 365.1183   | 6.06          | 5.06                | HMDB00725 | Trans-4-Hydroxyl-L-Proline    | 131.0582      | 365.1166 | 5.17       | 0.0017           | 0.11           |
| 27 | 381.1125   | 6.12          | 5.12                | HMDB00148 | L-Glutamic Acid               | 147.0532      | 381.1115 | 5.05       | 0.0010           | 0.07           |
| 28 | 365.1175   | 6.25          | 5.24                | HMDB00725 | Trans-4-Hydroxyl-L-Proline    | 131.0582      | 365.1166 | 5.17       | 0.0009           | 0.07           |
| 29 | 353.1176   | 6.31          | 5.30                | HMDB00167 | L-Threonine                   | 119.0582      | 353.1166 | 5.79       | 0.0010           | 0.49           |
| 30 | 353.1178   | 6.62          | 5.59                | HMDB00167 | L-Threonine                   | 119.0582      | 353.1166 | 5.79       | 0.0012           | 0.20           |
| 31 | 353.1176   | 6.92          | 5.94                | HMDB00167 | L-Threonine                   | 119.0582      | 353.1166 | 5.79       | 0.0010           | 0.15           |
| 32 | 295.1116   | 7.02          | 6.09                | HMDB00149 | Ethanolamine                  | 61.0528       | 295.1111 | 6          | 0.0005           | 0.09           |
| 33 | 395.1274   | 7.07          | 6.18                | HMDB00510 | Aminoadipic acid              | 161.0688      | 395.1271 | 5.97       | 0.0003           | 0.21           |
| 34 | 309.0913   | 7.14          | 6.29                | HMDB00123 | Glycine                       | 75.0320       | 309.0903 | 6.59       | 0.0010           | 0.30           |
| 35 | 323.1066   | 7.54          | 6.94                | HMDB00056 | Beta-Alanine                  | 89.0477       | 323.1060 | 7.24       | 0.0006           | 0.30           |
| 36 | 323.1069   | 7.91          | 7.55                | HMDB00056 | Beta-Alanine                  | 89.0477       | 323.1060 | 7.24       | 0.0009           | 0.31           |
| 37 | 323.1069   | 7.91          | 7.55                | HMDB00161 | L-Alanine                     | 89.0477       | 323.1060 | 7.57       | 0.0009           | 0.02           |
| 38 | 323.1073   | 8.36          | 7.97                | HMDB00161 | L-Alanine                     | 89.0477       | 323.1060 | 7.57       | 0.0013           | 0.40           |
| 39 | 337.1217   | 8.42          | 8.03                | HMDB00112 | Gamma-Aminobutyric acid       | 103.0633      | 337.1216 | 7.79       | 0.0001           | 0.24           |

| #  | Input mass | Input RT(min) | Calibrated RT (min) | HMDB.No.  | Name                      | Accurate mass | mz_light | library RT | Mass error ( Da) | RT error (min) |
|----|------------|---------------|---------------------|-----------|---------------------------|---------------|----------|------------|------------------|----------------|
| 40 | 337.1243   | 8.62          | 8.21                | HMDB00112 | Gamma-Aminobutyric acid   | 103.0633      | 337.1216 | 7.79       | 0.0027           | 0.42           |
| 41 | 337.1243   | 8.62          | 8.21                | HMDB03911 | 3-Aminoisobutanoic acid   | 103.0633      | 337.1216 | 8.67       | 0.0027           | 0.46           |
| 42 | 351.1377   | 8.81          | 8.39                | HMDB03355 | 5-Aminopentanoic acid     | 117.0790      | 351.1373 | 8.68       | 0.0004           | 0.29           |
| 43 | 363.1018   | 9.66          | 9.16                | HMDB00148 | L-Glutamic Acid - H2O     | 147.0532      | 363.1009 | 9.46       | 0.0009           | 0.30           |
| 44 | 337.1234   | 9.78          | 9.27                | HMDB00452 | L-Alpha-aminobutyric acid | 103.0633      | 337.1216 | 9.13       | 0.0018           | 0.14           |
| 45 | 337.1234   | 9.78          | 9.27                | HMDB00650 | D-Alpha-aminobutyric acid | 103.0633      | 337.1216 | 9.23       | 0.0018           | 0.04           |
| 46 | 337.1234   | 9.78          | 9.27                | HMDB01906 | 2-Aminoisobutyric acid    | 103.0633      | 337.1216 | 8.91       | 0.0018           | 0.36           |
| 47 | 370.0991   | 9.88          | 9.36                | HMDB00157 | Hypoxanthine - Isomer     | 136.0385      | 370.0968 | 9.65       | 0.0023           | 0.29           |
| 48 | 363.1019   | 9.91          | 9.39                | HMDB00148 | L-Glutamic Acid - H2O     | 147.0532      | 363.1009 | 9.46       | 0.0010           | 0.07           |
| 49 | 337.1233   | 9.96          | 9.43                | HMDB00452 | L-Alpha-aminobutyric acid | 103.0633      | 337.1216 | 9.13       | 0.0017           | 0.30           |
| 50 | 337.1233   | 9.96          | 9.43                | HMDB00650 | D-Alpha-aminobutyric acid | 103.0633      | 337.1216 | 9.23       | 0.0017           | 0.20           |
| 51 | 337.1216   | 10.12         | 9.58                | HMDB00452 | L-Alpha-aminobutyric acid | 103.0633      | 337.1216 | 9.13       | 0.0000           | 0.45           |
| 52 | 337.1216   | 10.12         | 9.58                | HMDB00650 | D-Alpha-aminobutyric acid | 103.0633      | 337.1216 | 9.23       | 0.0000           | 0.35           |
| 53 | 399.1235   | 10.48         | 9.90                | HMDB00897 | 7-Methylguanine           | 165.0651      | 399.1234 | 10.32      | 0.0001           | 0.42           |
| 54 | 399.1235   | 10.48         | 9.90                | HMDB03282 | 1-Methylguanine           | 165.0651      | 399.1234 | 9.57       | 0.0001           | 0.33           |
| 55 | 349.1229   | 10.64         | 10.05               | HMDB00162 | L-Proline                 | 115.0633      | 349.1216 | 10.18      | 0.0013           | 0.13           |
| 56 | 349.1226   | 10.99         | 10.35               | HMDB00162 | L-Proline                 | 115.0633      | 349.1216 | 10.18      | 0.0010           | 0.17           |
| 57 | 422.1703   | 11.29         | 10.59               | HMDB28844 | Glycyl-Isoleucine         | 188.1161      | 422.1744 | 10.78      | 0.0041           | 0.19           |
| 58 | 351.1380   | 11.53         | 10.78               | HMDB00883 | L-Valine                  | 117.0790      | 351.1373 | 10.81      | 0.0007           | 0.03           |
| 59 | 383.1107   | 11.70         | 10.92               | HMDB00696 | L-Methionine              | 149.0510      | 383.1094 | 10.89      | 0.0013           | 0.03           |
| 60 | 346.0862   | 11.73         | 10.95               | HMDB00300 | Uracil                    | 112.0273      | 346.0856 | 11.34      | 0.0006           | 0.39           |

| #  | Input mass | Input RT(min) | Calibrated RT (min) | HMDB.No.  | Name                       | Accurate mass | mz_light | library RT | Mass error ( Da) | RT error (min) |
|----|------------|---------------|---------------------|-----------|----------------------------|---------------|----------|------------|------------------|----------------|
| 61 | 351.1381   | 11.76         | 10.98               | HMDB00883 | L-Valine                   | 117.0790      | 351.1373 | 10.81      | 0.0008           | 0.17           |
| 62 | 422.1734   | 12.30         | 11.54               | HMDB00759 | Glycyl-L-Leucine           | 188.1161      | 422.1744 | 11.22      | 0.0010           | 0.32           |
| 63 | 438.1492   | 12.46         | 11.71               | HMDB00929 | L-Tryptophan               | 204.0899      | 438.1482 | 11.44      | 0.0010           | 0.27           |
| 64 | 456.1571   | 12.73         | 12.00               | HMDB28848 | Glycyl-Phenylalanine       | 222.1004      | 456.1588 | 11.65      | 0.0017           | 0.35           |
| 65 | 383.1296   | 13.29         | 12.59               | HMDB02099 | 6-Methyladenine            | 149.0701      | 383.1285 | 12.22      | 0.0011           | 0.37           |
| 66 | 383.1296   | 13.29         | 12.59               | HMDB02099 | 6-Methyladenine - Isomer   | 149.0701      | 383.1285 | 12.74      | 0.0011           | 0.15           |
| 67 | 399.1387   | 13.46         | 12.77               | HMDB00159 | L-Phenylalanine            | 165.0790      | 399.1373 | 12.74      | 0.0014           | 0.03           |
| 68 | 365.1540   | 13.69         | 12.96               | HMDB00172 | L-Isoleucine               | 131.0946      | 365.1529 | 13.06      | 0.0011           | 0.10           |
| 69 | 365.1540   | 13.69         | 12.96               | HMDB00557 | L-Alloisoleucine           | 131.0946      | 365.1529 | 13.2       | 0.0011           | 0.24           |
| 70 | 365.1540   | 13.69         | 12.96               | HMDB00687 | L-leucine                  | 131.0946      | 365.1529 | 13.36      | 0.0011           | 0.40           |
| 71 | 365.1538   | 13.95         | 13.18               | HMDB00172 | L-Isoleucine               | 131.0946      | 365.1529 | 13.06      | 0.0009           | 0.12           |
| 72 | 365.1538   | 13.95         | 13.18               | HMDB00557 | L-Alloisoleucine           | 131.0946      | 365.1529 | 13.2       | 0.0009           | 0.02           |
| 73 | 365.1538   | 13.95         | 13.18               | HMDB00687 | L-leucine                  | 131.0946      | 365.1529 | 13.36      | 0.0009           | 0.18           |
| 74 | 364.6260   | 14.16         | 13.36               | HMDB04987 | Alpha-Aspartyl-lysine      | 261.1325      | 364.6246 | 13.61      | 0.0014           | 0.25           |
| 75 | 365.1495   | 14.24         | 13.42               | HMDB00172 | L-Isoleucine               | 131.0946      | 365.1529 | 13.06      | 0.0034           | 0.36           |
| 76 | 365.1495   | 14.24         | 13.42               | HMDB00557 | L-Alloisoleucine           | 131.0946      | 365.1529 | 13.2       | 0.0034           | 0.22           |
| 77 | 365.1495   | 14.24         | 13.42               | HMDB00687 | L-leucine                  | 131.0946      | 365.1529 | 13.36      | 0.0034           | 0.06           |
| 78 | 345.0932   | 14.65         | 13.77               | HMDB00099 | L-Cystathionine            | 222.0674      | 345.0920 | 13.34      | 0.0012           | 0.43           |
| 79 | 345.0932   | 14.65         | 13.77               | HMDB00099 | L-Cystathionine - Isomer   | 222.0674      | 345.0920 | 13.69      | 0.0012           | 0.08           |
| 80 | 345.0932   | 14.65         | 13.77               | HMDB00455 | Allocystathionine          | 222.0674      | 345.0920 | 13.33      | 0.0012           | 0.44           |
| 81 | 345.0932   | 14.65         | 13.77               | HMDB00455 | Allocystathionine - Isomer | 222.0674      | 345.0920 | 13.61      | 0.0012           | 0.16           |

| #  | Input mass | Input RT(min) | Calibrated RT (min) | HMDB.No.  | Name                      | Accurate mass | mz_light | library RT | Mass error ( Da) | RT error (min) |
|----|------------|---------------|---------------------|-----------|---------------------------|---------------|----------|------------|------------------|----------------|
| 82 | 416.1171   | 14.80         | 13.90               | HMDB00755 | Hydroxyphenyllactici acid | 182.0579      | 416.1162 | 14.39      | 0.0009           | 0.49           |
| 83 | 354.0713   | 15.05         | 14.11               | HMDB00192 | L-Cystine                 | 240.0238      | 354.0702 | 14.11      | 0.0011           | 0.00           |
| 84 | 300.1039   | 16.35         | 16.29               | HMDB00214 | Ornithine                 | 132.0899      | 300.1033 | 16.58      | 0.0006           | 0.29           |
| 85 | 307.1128   | 17.06         | 17.47               | HMDB00182 | L-Lysine                  | 146.1055      | 307.1111 | 17.47      | 0.0017           | 0.00           |
| 86 | 389.1281   | 17.77         | 18.56               | HMDB00177 | L-Histidine               | 155.0695      | 389.1278 | 18.09      | 0.0003           | 0.47           |
| 87 | 324.5968   | 20.44         | 22.66               | HMDB00158 | L-Tyrosine                | 181.0739      | 324.5953 | 22.65      | 0.0015           | 0.01           |
| 88 | 324.5968   | 20.44         | 22.66               | HMDB06050 | o-Tyrosine                | 181.0739      | 324.5953 | 22.38      | 0.0015           | 0.28           |
| 89 | 289.0777   | 24.19         | 26.41               | HMDB00957 | pyrocatechol              | 110.0368      | 289.0767 | 26.7       | 0.0010           | 0.29           |

Table S1B. Identification of cellular metabolites by searching the accurate mass of the peak pairs against the HMDB library.

| #  | RT (s) | mz_light  | mz_heavy  | mz        | distance | int_light | nCharge | nTag | Possible hits     |
|----|--------|-----------|-----------|-----------|----------|-----------|---------|------|-------------------|
| 1  | 128.55 | 375.07841 | 377.08489 | 141.02009 | 2.00648  | 1090000   | 1       | 1    | <a href="#">1</a> |
| 2  | 130.55 | 367.09644 | 369.10373 | 133.03812 | 2.00730  | 1100000   | 1       | 1    | <a href="#">3</a> |
| 3  | 135.60 | 449.11410 | 451.11910 | 215.05578 | 2.00500  | 29175     | 1       | 1    | <a href="#">1</a> |
| 4  | 135.83 | 381.11109 | 383.11661 | 147.05277 | 2.00552  | 14850     | 1       | 1    | <a href="#">6</a> |
| 5  | 136.16 | 366.11233 | 368.11887 | 132.05401 | 2.00654  | 3630000   | 1       | 1    | <a href="#">4</a> |
| 6  | 151.91 | 380.12827 | 382.13458 | 146.06995 | 2.00631  | 5385000   | 1       | 1    | <a href="#">4</a> |
| 7  | 152.99 | 280.10057 | 282.10707 | 46.04225  | 2.00650  | 533125    | 1       | 1    | <a href="#">1</a> |
| 8  | 154.60 | 449.11495 | 451.12088 | 215.05663 | 2.00594  | 295375    | 1       | 1    | <a href="#">1</a> |
| 9  | 167.81 | 449.11502 | 451.12073 | 215.05670 | 2.00571  | 358969    | 1       | 1    | <a href="#">1</a> |
| 10 | 182.60 | 366.11259 | 368.11900 | 132.05427 | 2.00641  | 4930000   | 1       | 1    | <a href="#">4</a> |
| 11 | 184.50 | 389.12732 | 391.13404 | 155.06900 | 2.00672  | 18850     | 1       | 1    | <a href="#">1</a> |
| 12 | 185.26 | 381.11133 | 383.11619 | 147.05301 | 2.00485  | 30650     | 1       | 1    | <a href="#">6</a> |
| 13 | 197.89 | 389.12769 | 391.13316 | 155.06937 | 2.00546  | 14900     | 1       | 1    | <a href="#">1</a> |
| 14 | 200.90 | 359.07348 | 361.07845 | 125.01516 | 2.00497  | 150650    | 1       | 1    | <a href="#">1</a> |
| 15 | 211.31 | 389.12757 | 391.13309 | 155.06925 | 2.00552  | 23100     | 1       | 1    | <a href="#">1</a> |
| 16 | 212.64 | 380.12853 | 382.13487 | 146.07021 | 2.00634  | 7150000   | 1       | 1    | <a href="#">4</a> |
| 17 | 214.39 | 517.15048 | 519.15673 | 283.09216 | 2.00626  | 57238     | 1       | 1    | <a href="#">2</a> |
| 18 | 215.35 | 359.07352 | 361.07922 | 125.01520 | 2.00569  | 257066    | 1       | 1    | <a href="#">1</a> |
| 19 | 220.65 | 339.10168 | 341.10819 | 105.04336 | 2.00652  | 947000    | 1       | 1    | <a href="#">2</a> |
| 20 | 227.01 | 517.15056 | 519.15586 | 283.09224 | 2.00530  | 40500     | 1       | 1    | <a href="#">2</a> |
| 21 | 230.26 | 365.11736 | 367.12365 | 131.05904 | 2.00628  | 3980000   | 1       | 1    | <a href="#">8</a> |



| #  | RT (s) | mz_light  | mz_heavy  | mz        | distance | int_light | nCharge | nTag | Possible hits      |
|----|--------|-----------|-----------|-----------|----------|-----------|---------|------|--------------------|
| 22 | 239.27 | 517.15025 | 519.15680 | 283.09193 | 2.00655  | 123781    | 1       | 1    | <a href="#">2</a>  |
| 23 | 241.67 | 408.17093 | 410.17733 | 174.11261 | 2.00640  | 422000    | 1       | 1    | <a href="#">2</a>  |
| 24 | 243.67 | 339.10156 | 341.10796 | 105.04324 | 2.00640  | 716000    | 1       | 1    | <a href="#">2</a>  |
| 25 | 245.84 | 293.10647 | 295.11258 | 59.04815  | 2.00611  | 36719     | 1       | 1    | <a href="#">1</a>  |
| 26 | 245.96 | 380.12882 | 382.13501 | 146.07050 | 2.00619  | 1151250   | 1       | 1    | <a href="#">4</a>  |
| 27 | 251.50 | 403.14269 | 405.14879 | 169.08437 | 2.00611  | 18700     | 1       | 1    | <a href="#">2</a>  |
| 28 | 252.68 | 485.15814 | 487.16431 | 251.09982 | 2.00618  | 10600     | 1       | 1    | <a href="#">3</a>  |
| 29 | 253.98 | 397.12472 | 399.13073 | 163.06640 | 2.00602  | 70800     | 1       | 1    | <a href="#">1</a>  |
| 30 | 259.28 | 381.11129 | 383.11740 | 147.05297 | 2.00611  | 98400     | 1       | 1    | <a href="#">6</a>  |
| 31 | 261.28 | 424.11749 | 426.12373 | 190.05917 | 2.00624  | 12200     | 1       | 1    | <a href="#">1</a>  |
| 32 | 262.06 | 408.17053 | 410.17718 | 174.11221 | 2.00664  | 910375    | 1       | 1    | <a href="#">2</a>  |
| 33 | 262.60 | 414.12169 | 416.12685 | 180.06337 | 2.00516  | 14375     | 1       | 1    | <a href="#">17</a> |
| 34 | 263.63 | 509.16934 | 511.17527 | 275.11102 | 2.00592  | 10886     | 1       | 1    | <a href="#">2</a>  |
| 35 | 267.30 | 366.11246 | 368.11905 | 132.05414 | 2.00658  | 2732500   | 1       | 1    | <a href="#">4</a>  |
| 36 | 270.46 | 502.13862 | 504.14406 | 268.08030 | 2.00544  | 48378     | 1       | 1    | <a href="#">4</a>  |
| 37 | 274.87 | 414.12151 | 416.12753 | 180.06319 | 2.00602  | 25619     | 1       | 1    | <a href="#">17</a> |
| 38 | 275.78 | 501.11490 | 505.12821 | 34.00556  | 4.01330  | 8610      | 1       | 2    | <a href="#">1</a>  |
| 39 | 278.70 | 365.11775 | 367.12414 | 131.05943 | 2.00639  | 5270000   | 1       | 1    | <a href="#">8</a>  |
| 40 | 288.82 | 502.13914 | 504.14539 | 268.08082 | 2.00625  | 67813     | 1       | 1    | <a href="#">4</a>  |
| 41 | 294.79 | 380.12789 | 382.13457 | 146.06957 | 2.00668  | 8270000   | 1       | 1    | <a href="#">4</a>  |
| 42 | 303.29 | 422.20971 | 424.21525 | 188.15139 | 2.00555  | 12800     | 1       | 1    | <a href="#">1</a>  |
| 43 | 307.52 | 367.09617 | 369.10188 | 133.03785 | 2.00571  | 73800     | 1       | 1    | <a href="#">3</a>  |
| 44 | 308.56 | 399.10441 | 401.11003 | 165.04609 | 2.00562  | 87138     | 1       | 1    | <a href="#">1</a>  |
| 45 | 313.95 | 353.11661 | 355.12308 | 119.05829 | 2.00647  | 17095     | 1       | 1    | <a href="#">3</a>  |

| #  | RT (s) | mz_light  | mz_heavy  | mz        | distance | int_light | nCharge | nTag | Possible hits     |
|----|--------|-----------|-----------|-----------|----------|-----------|---------|------|-------------------|
| 46 | 315.35 | 422.20975 | 424.21408 | 188.15143 | 2.00433  | 18800     | 1       | 1    | <a href="#">1</a> |
| 47 | 323.31 | 515.17349 | 517.17615 | 281.11517 | 2.00267  | 16400     | 1       | 1    | <a href="#">4</a> |
| 48 | 324.66 | 399.10460 | 401.11050 | 165.04628 | 2.00591  | 108188    | 1       | 1    | <a href="#">1</a> |
| 49 | 328.26 | 353.11570 | 355.12276 | 119.05738 | 2.00706  | 29640     | 1       | 1    | <a href="#">3</a> |
| 50 | 329.51 | 436.20105 | 438.20708 | 202.14273 | 2.00603  | 152100    | 1       | 1    | <a href="#">2</a> |
| 51 | 334.98 | 339.10164 | 341.10806 | 105.04332 | 2.00642  | 4457328   | 1       | 1    | <a href="#">2</a> |
| 52 | 336.70 | 381.11222 | 383.11861 | 147.05390 | 2.00639  | 4248125   | 1       | 1    | <a href="#">6</a> |
| 53 | 341.05 | 485.15870 | 487.16574 | 251.10038 | 2.00704  | 5730      | 1       | 1    | <a href="#">3</a> |
| 54 | 342.77 | 501.15562 | 503.16298 | 267.09730 | 2.00736  | 757001    | 1       | 1    | <a href="#">3</a> |
| 55 | 348.06 | 399.10454 | 401.11017 | 165.04622 | 2.00563  | 88742     | 1       | 1    | <a href="#">1</a> |
| 56 | 348.18 | 436.20196 | 438.20781 | 202.14364 | 2.00585  | 303438    | 1       | 1    | <a href="#">2</a> |
| 57 | 356.79 | 309.09095 | 311.09723 | 75.03263  | 2.00628  | 4960000   | 1       | 1    | <a href="#">1</a> |
| 58 | 357.74 | 403.14387 | 405.14969 | 169.08555 | 2.00581  | 281438    | 1       | 1    | <a href="#">2</a> |
| 59 | 367.31 | 381.11247 | 383.11880 | 147.05415 | 2.00633  | 5609727   | 1       | 1    | <a href="#">6</a> |
| 60 | 374.81 | 365.11747 | 367.12385 | 131.05915 | 2.00639  | 4229414   | 1       | 1    | <a href="#">8</a> |
| 61 | 378.65 | 353.11761 | 355.12394 | 119.05929 | 2.00633  | 2992813   | 1       | 1    | <a href="#">3</a> |
| 62 | 381.46 | 348.10231 | 350.10893 | 114.04399 | 2.00662  | 725734    | 1       | 1    | <a href="#">2</a> |
| 63 | 388.10 | 462.16913 | 464.17576 | 228.11081 | 2.00663  | 12300     | 1       | 1    | <a href="#">1</a> |
| 64 | 388.72 | 519.19061 | 521.19662 | 285.13229 | 2.00600  | 22688     | 1       | 1    | <a href="#">1</a> |
| 65 | 397.93 | 348.10208 | 350.10861 | 114.04376 | 2.00653  | 541836    | 1       | 1    | <a href="#">2</a> |
| 66 | 399.93 | 379.13280 | 381.13921 | 145.07448 | 2.00641  | 215625    | 1       | 1    | <a href="#">6</a> |
| 67 | 402.54 | 422.18553 | 424.19106 | 188.12721 | 2.00553  | 11240     | 1       | 1    | <a href="#">1</a> |
| 68 | 407.85 | 387.12216 | 389.12880 | 153.06384 | 2.00664  | 26000     | 1       | 1    | <a href="#">1</a> |
| 69 | 408.69 | 519.19132 | 521.19627 | 285.13300 | 2.00495  | 21717     | 1       | 1    | <a href="#">1</a> |

| #  | RT (s) | mz_light  | mz_heavy  | mz        | distance | int_light | nCharge | nTag | Possible hits     |
|----|--------|-----------|-----------|-----------|----------|-----------|---------|------|-------------------|
| 70 | 415.48 | 353.11755 | 355.12423 | 119.05923 | 2.00668  | 2729063   | 1       | 1    | <a href="#">3</a> |
| 71 | 421.02 | 295.11164 | 297.11822 | 61.05332  | 2.00658  | 5788438   | 1       | 1    | <a href="#">1</a> |
| 72 | 421.38 | 462.17009 | 464.17678 | 228.11177 | 2.00668  | 296900    | 1       | 1    | <a href="#">1</a> |
| 73 | 424.37 | 395.12736 | 397.13316 | 161.06904 | 2.00580  | 20125     | 1       | 1    | <a href="#">1</a> |
| 74 | 424.86 | 323.10599 | 325.11256 | 89.04767  | 2.00657  | 39700     | 1       | 1    | <a href="#">4</a> |
| 75 | 445.30 | 362.11810 | 364.12644 | 128.05978 | 2.00834  | 1001738   | 1       | 1    | <a href="#">1</a> |
| 76 | 447.57 | 462.17023 | 464.17701 | 228.11191 | 2.00678  | 545286    | 1       | 1    | <a href="#">1</a> |
| 77 | 449.16 | 279.07998 | 281.08641 | 45.02166  | 2.00643  | 57400     | 1       | 1    | <a href="#">1</a> |
| 78 | 452.34 | 323.10658 | 325.11269 | 89.04826  | 2.00611  | 208720    | 1       | 1    | <a href="#">4</a> |
| 79 | 453.95 | 350.15306 | 352.15991 | 116.09474 | 2.00684  | 269000    | 1       | 1    | <a href="#">1</a> |
| 80 | 455.15 | 422.18630 | 424.19207 | 188.12798 | 2.00576  | 216875    | 1       | 1    | <a href="#">1</a> |
| 81 | 462.69 | 348.10128 | 350.10738 | 114.04296 | 2.00610  | 108031    | 1       | 1    | <a href="#">2</a> |
| 82 | 466.48 | 394.14419 | 396.15015 | 160.08587 | 2.00596  | 555063    | 1       | 1    | <a href="#">1</a> |
| 83 | 483.12 | 351.13712 | 353.14330 | 117.07880 | 2.00618  | 30788     | 1       | 1    | <a href="#">5</a> |
| 84 | 493.83 | 483.14478 | 485.14973 | 249.08646 | 2.00496  | 20163     | 1       | 1    | <a href="#">2</a> |
| 85 | 504.20 | 406.14277 | 408.14745 | 172.08445 | 2.00468  | 28370     | 1       | 1    | <a href="#">2</a> |
| 86 | 505.02 | 337.12174 | 339.12804 | 103.06342 | 2.00631  | 53450     | 1       | 1    | <a href="#">8</a> |
| 87 | 508.30 | 353.11728 | 355.12351 | 119.05896 | 2.00623  | 416250    | 1       | 1    | <a href="#">3</a> |
| 88 | 511.82 | 531.14922 | 533.15339 | 297.09090 | 2.00418  | 12890     | 1       | 1    | <a href="#">1</a> |
| 89 | 516.31 | 395.12676 | 397.13366 | 161.06844 | 2.00690  | 13638     | 1       | 1    | <a href="#">1</a> |
| 90 | 526.08 | 406.14310 | 408.14897 | 172.08478 | 2.00587  | 42838     | 1       | 1    | <a href="#">2</a> |
| 91 | 526.29 | 408.15879 | 410.16518 | 174.10047 | 2.00639  | 85094     | 1       | 1    | <a href="#">1</a> |
| 92 | 528.64 | 351.13765 | 353.14416 | 117.07933 | 2.00651  | 221750    | 1       | 1    | <a href="#">5</a> |
| 93 | 530.33 | 381.11275 | 383.11933 | 147.05443 | 2.00658  | 1034250   | 1       | 1    | <a href="#">6</a> |

| #   | RT (s) | mz_light  | mz_heavy  | mz        | distance | int_light | nCharge | nTag | Possible hits     |
|-----|--------|-----------|-----------|-----------|----------|-----------|---------|------|-------------------|
| 94  | 532.98 | 363.10161 | 365.10799 | 129.04329 | 2.00637  | 4520000   | 1       | 1    | <a href="#">5</a> |
| 95  | 535.65 | 517.14990 | 519.15657 | 283.09158 | 2.00667  | 18878     | 1       | 1    | <a href="#">2</a> |
| 96  | 542.90 | 478.12954 | 480.13613 | 244.07122 | 2.00659  | 2737188   | 1       | 1    | <a href="#">3</a> |
| 97  | 543.40 | 366.10158 | 368.10735 | 132.04326 | 2.00578  | 128463    | 1       | 1    | <a href="#">7</a> |
| 98  | 547.62 | 457.08936 | 459.09627 | 446.06208 | 2.00691  | 26747     | 2       | 2    | <a href="#">1</a> |
| 99  | 547.71 | 502.13779 | 504.14503 | 268.07947 | 2.00724  | 16053     | 1       | 1    | <a href="#">4</a> |
| 100 | 547.94 | 385.10861 | 387.11500 | 151.05029 | 2.00639  | 732813    | 1       | 1    | <a href="#">3</a> |
| 101 | 553.31 | 344.10654 | 346.11273 | 110.04822 | 2.00619  | 56450     | 1       | 1    | <a href="#">1</a> |
| 102 | 556.07 | 363.10205 | 365.10843 | 129.04373 | 2.00638  | 6634063   | 1       | 1    | <a href="#">5</a> |
| 103 | 558.30 | 395.12784 | 397.13457 | 161.06952 | 2.00672  | 7980000   | 1       | 1    | <a href="#">1</a> |
| 104 | 561.38 | 362.11731 | 364.12320 | 128.05899 | 2.00589  | 138625    | 1       | 1    | <a href="#">1</a> |
| 105 | 562.51 | 457.08994 | 459.09592 | 446.06323 | 2.00598  | 11015     | 2       | 2    | <a href="#">1</a> |
| 106 | 565.43 | 309.12698 | 311.13281 | 75.06866  | 2.00583  | 35750     | 1       | 1    | <a href="#">2</a> |
| 107 | 574.29 | 321.09117 | 323.09805 | 87.03285  | 2.00688  | 24000     | 1       | 1    | <a href="#">1</a> |
| 108 | 579.77 | 363.10184 | 365.10809 | 129.04352 | 2.00625  | 4109891   | 1       | 1    | <a href="#">5</a> |
| 109 | 588.15 | 436.20103 | 438.20623 | 202.14271 | 2.00520  | 94138     | 1       | 1    | <a href="#">2</a> |
| 110 | 592.53 | 453.16876 | 455.17427 | 219.11044 | 2.00551  | 11355     | 1       | 1    | <a href="#">2</a> |
| 111 | 594.61 | 363.10185 | 365.10838 | 129.04353 | 2.00652  | 6160379   | 1       | 1    | <a href="#">5</a> |
| 112 | 595.81 | 481.08373 | 483.08967 | 247.02541 | 2.00594  | 11970     | 1       | 1    | <a href="#">1</a> |
| 113 | 603.78 | 460.11871 | 462.12532 | 226.06039 | 2.00661  | 2648125   | 1       | 1    | <a href="#">1</a> |
| 114 | 607.40 | 337.12161 | 339.12866 | 103.06329 | 2.00705  | 30138     | 1       | 1    | <a href="#">8</a> |
| 115 | 608.53 | 379.13319 | 381.13957 | 145.07487 | 2.00638  | 4882500   | 1       | 1    | <a href="#">6</a> |
| 116 | 613.48 | 366.10172 | 368.10709 | 132.04340 | 2.00537  | 36813     | 1       | 1    | <a href="#">7</a> |
| 117 | 618.83 | 398.12742 | 400.13418 | 164.06910 | 2.00676  | 15704     | 1       | 1    | <a href="#">6</a> |

| #   | RT (s) | mz_light  | mz_heavy  | mz        | distance | int_light | nCharge | nTag | Possible hits     |
|-----|--------|-----------|-----------|-----------|----------|-----------|---------|------|-------------------|
| 118 | 625.50 | 321.12682 | 323.13226 | 87.06850  | 2.00544  | 61700     | 1       | 1    | <a href="#">1</a> |
| 119 | 628.59 | 399.12352 | 401.13031 | 165.06520 | 2.00679  | 28125     | 1       | 1    | <a href="#">4</a> |
| 120 | 634.51 | 523.15941 | 525.16617 | 289.10109 | 2.00676  | 10650     | 1       | 1    | <a href="#">1</a> |
| 121 | 637.92 | 409.14260 | 411.14805 | 175.08428 | 2.00545  | 14850     | 1       | 1    | <a href="#">1</a> |
| 122 | 650.67 | 370.09800 | 372.10423 | 136.03968 | 2.00623  | 7773750   | 1       | 1    | <a href="#">1</a> |
| 123 | 651.38 | 428.13809 | 430.14467 | 194.07977 | 2.00658  | 6630      | 1       | 1    | <a href="#">1</a> |
| 124 | 659.53 | 349.12263 | 351.12898 | 115.06431 | 2.00635  | 11411250  | 1       | 1    | <a href="#">2</a> |
| 125 | 661.17 | 477.16393 | 479.16971 | 243.10561 | 2.00578  | 2880000   | 1       | 1    | <a href="#">1</a> |
| 126 | 661.65 | 629.21084 | 633.22356 | 162.10150 | 4.01272  | 46294     | 1       | 2    | <a href="#">1</a> |
| 127 | 668.38 | 513.11465 | 517.13032 | 46.00531  | 4.01567  | 12400     | 1       | 2    | <a href="#">1</a> |
| 128 | 680.64 | 380.16324 | 382.16945 | 146.10492 | 2.00621  | 23225     | 1       | 1    | <a href="#">4</a> |
| 129 | 681.13 | 447.10422 | 449.10983 | 426.09179 | 2.00562  | 97300     | 2       | 2    | <a href="#">1</a> |
| 130 | 681.48 | 408.15890 | 410.16512 | 174.10058 | 2.00622  | 147438    | 1       | 1    | <a href="#">1</a> |
| 131 | 691.52 | 351.13804 | 353.14453 | 117.07972 | 2.00649  | 4883750   | 1       | 1    | <a href="#">5</a> |
| 132 | 694.42 | 792.31510 | 794.32160 | 558.25678 | 2.00650  | 38200     | 1       | 1    | <a href="#">1</a> |
| 133 | 696.70 | 337.12183 | 339.12738 | 103.06351 | 2.00555  | 71066     | 1       | 1    | <a href="#">8</a> |
| 134 | 701.98 | 383.11071 | 385.11669 | 149.05239 | 2.00598  | 3057500   | 1       | 1    | <a href="#">1</a> |
| 135 | 703.73 | 346.08617 | 348.09312 | 112.02785 | 2.00696  | 589969    | 1       | 1    | <a href="#">1</a> |
| 136 | 705.57 | 351.13814 | 353.14451 | 117.07982 | 2.00637  | 5506875   | 1       | 1    | <a href="#">5</a> |
| 137 | 713.83 | 321.09108 | 323.09733 | 87.03276  | 2.00625  | 99513     | 1       | 1    | <a href="#">1</a> |
| 138 | 722.45 | 660.14851 | 662.15682 | 426.09019 | 2.00831  | 6610      | 1       | 1    | <a href="#">1</a> |
| 139 | 727.18 | 447.10405 | 449.11097 | 426.09146 | 2.00692  | 877000    | 2       | 2    | <a href="#">1</a> |
| 140 | 728.14 | 377.10763 | 379.11261 | 286.09863 | 2.00498  | 6090      | 2       | 2    | <a href="#">1</a> |
| 141 | 734.50 | 409.14398 | 411.15035 | 175.08566 | 2.00638  | 834750    | 1       | 1    | <a href="#">1</a> |

| #   | RT (s) | mz_light  | mz_heavy  | mz        | distance | int_light | nCharge | nTag | Possible hits     |
|-----|--------|-----------|-----------|-----------|----------|-----------|---------|------|-------------------|
| 142 | 736.07 | 508.18198 | 510.18851 | 274.12366 | 2.00652  | 139066    | 1       | 1    | <a href="#">1</a> |
| 143 | 737.72 | 422.17337 | 424.18035 | 188.11505 | 2.00698  | 27056     | 1       | 1    | <a href="#">3</a> |
| 144 | 740.86 | 395.12823 | 397.13450 | 161.06991 | 2.00627  | 423375    | 1       | 1    | <a href="#">1</a> |
| 145 | 741.29 | 447.10423 | 449.11084 | 426.09182 | 2.00661  | 337000    | 2       | 2    | <a href="#">1</a> |
| 146 | 747.39 | 438.14918 | 440.15526 | 204.09086 | 2.00608  | 369203    | 1       | 1    | <a href="#">1</a> |
| 147 | 748.48 | 629.21024 | 633.22259 | 162.10090 | 4.01235  | 28744     | 1       | 2    | <a href="#">1</a> |
| 148 | 754.58 | 508.18119 | 510.18854 | 274.12287 | 2.00735  | 16000     | 1       | 1    | <a href="#">1</a> |
| 149 | 755.28 | 400.08638 | 402.09188 | 166.02806 | 2.00550  | 44934     | 1       | 1    | <a href="#">3</a> |
| 150 | 766.89 | 319.11190 | 321.11744 | 85.05358  | 2.00553  | 112100    | 1       | 1    | <a href="#">1</a> |
| 151 | 778.61 | 409.14393 | 411.15026 | 175.08561 | 2.00633  | 5070000   | 1       | 1    | <a href="#">1</a> |
| 152 | 784.41 | 321.11600 | 323.12256 | 174.11536 | 2.00656  | 726929    | 2       | 2    | <a href="#">1</a> |
| 153 | 784.70 | 426.12069 | 428.12700 | 192.06237 | 2.00631  | 30900     | 1       | 1    | <a href="#">1</a> |
| 154 | 792.72 | 448.19043 | 450.19675 | 214.13211 | 2.00632  | 14950     | 1       | 1    | <a href="#">1</a> |
| 155 | 797.27 | 383.12959 | 385.13434 | 149.07127 | 2.00475  | 26300     | 1       | 1    | <a href="#">4</a> |
| 156 | 802.46 | 360.10231 | 362.11009 | 126.04399 | 2.00778  | 1398938   | 1       | 1    | <a href="#">2</a> |
| 157 | 805.99 | 371.63317 | 373.64010 | 275.14970 | 2.00693  | 24234     | 2       | 2    | <a href="#">2</a> |
| 158 | 807.82 | 399.13874 | 401.14507 | 165.08042 | 2.00633  | 6773984   | 1       | 1    | <a href="#">4</a> |
| 159 | 821.19 | 365.15396 | 367.16031 | 131.09564 | 2.00635  | 7231250   | 1       | 1    | <a href="#">6</a> |
| 160 | 829.88 | 377.11666 | 379.12301 | 143.05834 | 2.00635  | 101000    | 1       | 1    | <a href="#">1</a> |
| 161 | 837.18 | 365.15381 | 367.16020 | 131.09549 | 2.00640  | 11103628  | 1       | 1    | <a href="#">6</a> |
| 162 | 861.13 | 307.11155 | 309.11857 | 73.05323  | 2.00702  | 486000    | 1       | 1    | <a href="#">3</a> |
| 163 | 862.62 | 397.12573 | 399.13122 | 163.06741 | 2.00550  | 15900     | 1       | 1    | <a href="#">1</a> |
| 164 | 862.94 | 612.26765 | 616.28052 | 145.15831 | 4.01287  | 55600     | 1       | 2    | <a href="#">1</a> |
| 165 | 867.32 | 597.11651 | 599.12135 | 363.05819 | 2.00484  | 37600     | 1       | 1    | <a href="#">2</a> |

| #   | RT (s) | mz_light  | mz_heavy  | mz        | distance | int_light | nCharge | nTag | Possible hits     |
|-----|--------|-----------|-----------|-----------|----------|-----------|---------|------|-------------------|
| 166 | 867.40 | 626.28276 | 630.29547 | 159.17342 | 4.01272  | 6790      | 1       | 2    | <a href="#">1</a> |
| 167 | 867.75 | 322.07429 | 324.08036 | 88.01597  | 2.00607  | 19650     | 1       | 1    | <a href="#">2</a> |
| 168 | 871.61 | 300.08643 | 302.09315 | 132.05623 | 2.00671  | 9500      | 2       | 2    | <a href="#">1</a> |
| 169 | 872.61 | 309.58359 | 311.58829 | 151.05055 | 2.00469  | 13000     | 2       | 2    | <a href="#">3</a> |
| 170 | 878.84 | 345.09318 | 347.10010 | 222.06971 | 2.00692  | 37000     | 2       | 2    | <a href="#">1</a> |
| 171 | 883.24 | 555.15155 | 557.15731 | 321.09323 | 2.00576  | 231500    | 1       | 1    | <a href="#">1</a> |
| 172 | 888.22 | 416.11709 | 418.12230 | 182.05877 | 2.00521  | 12350     | 1       | 1    | <a href="#">6</a> |
| 173 | 892.63 | 612.26689 | 616.27972 | 145.15755 | 4.01283  | 15275     | 1       | 2    | <a href="#">1</a> |
| 174 | 892.89 | 629.21068 | 633.22377 | 162.10134 | 4.01309  | 43625     | 1       | 2    | <a href="#">1</a> |
| 175 | 893.58 | 462.20597 | 464.21145 | 228.14765 | 2.00548  | 21413     | 1       | 1    | <a href="#">2</a> |
| 176 | 902.75 | 354.07128 | 356.07781 | 240.02593 | 2.00653  | 182000    | 2       | 2    | <a href="#">1</a> |
| 177 | 905.49 | 387.10050 | 389.10642 | 153.04218 | 2.00592  | 48838     | 1       | 1    | <a href="#">2</a> |
| 178 | 905.98 | 363.13816 | 365.14459 | 129.07984 | 2.00643  | 3792500   | 1       | 1    | <a href="#">4</a> |
| 179 | 911.64 | 612.26781 | 616.28023 | 145.15847 | 4.01241  | 50188     | 1       | 2    | <a href="#">1</a> |
| 180 | 927.44 | 502.09665 | 504.10388 | 268.03833 | 2.00723  | 19863     | 1       | 1    | <a href="#">1</a> |
| 181 | 928.09 | 496.18981 | 498.19654 | 262.13149 | 2.00673  | 18156     | 1       | 1    | <a href="#">2</a> |
| 182 | 929.06 | 393.14769 | 395.15427 | 159.08937 | 2.00658  | 33403     | 1       | 1    | <a href="#">6</a> |
| 183 | 931.97 | 431.12581 | 433.13110 | 197.06749 | 2.00529  | 20250     | 1       | 1    | <a href="#">2</a> |
| 184 | 938.40 | 411.10457 | 413.11191 | 177.04625 | 2.00734  | 8470      | 1       | 1    | <a href="#">1</a> |
| 185 | 940.82 | 502.09687 | 504.10423 | 268.03855 | 2.00736  | 17363     | 1       | 1    | <a href="#">1</a> |
| 186 | 948.03 | 612.26605 | 616.27923 | 145.15671 | 4.01318  | 11100     | 1       | 2    | <a href="#">1</a> |
| 187 | 949.91 | 351.13795 | 353.14454 | 117.07963 | 2.00659  | 612125    | 1       | 1    | <a href="#">5</a> |
| 188 | 957.72 | 350.64614 | 352.65257 | 233.17564 | 2.00643  | 42431     | 2       | 2    | <a href="#">1</a> |
| 189 | 966.82 | 501.11493 | 505.12830 | 34.00559  | 4.01336  | 60559     | 1       | 2    | <a href="#">1</a> |

| #   | RT (s)  | mz_light  | mz_heavy  | mz        | distance | int_light | nCharge | nTag | Possible hits     |
|-----|---------|-----------|-----------|-----------|----------|-----------|---------|------|-------------------|
| 190 | 966.88  | 368.09964 | 370.10638 | 268.08265 | 2.00673  | 61681     | 2       | 2    | <a href="#">3</a> |
| 191 | 967.86  | 413.15322 | 415.16196 | 179.09490 | 2.00874  | 26650     | 1       | 1    | <a href="#">2</a> |
| 192 | 971.73  | 311.59287 | 313.59969 | 155.06910 | 2.00682  | 77994     | 2       | 2    | <a href="#">1</a> |
| 193 | 975.74  | 371.63248 | 373.63850 | 275.14832 | 2.00602  | 10238     | 2       | 2    | <a href="#">2</a> |
| 194 | 977.06  | 342.63030 | 344.63687 | 217.14397 | 2.00657  | 14375     | 2       | 2    | <a href="#">1</a> |
| 195 | 980.38  | 346.09891 | 348.10579 | 224.08118 | 2.00688  | 10500     | 2       | 2    | <a href="#">3</a> |
| 196 | 980.97  | 300.10391 | 302.11049 | 132.09119 | 2.00657  | 40300     | 2       | 2    | <a href="#">2</a> |
| 197 | 987.45  | 494.68875 | 496.69480 | 521.26086 | 2.00605  | 6890      | 2       | 2    | <a href="#">1</a> |
| 198 | 1004.84 | 407.16383 | 409.17006 | 173.10551 | 2.00623  | 44875     | 1       | 1    | <a href="#">4</a> |
| 199 | 1005.29 | 379.16895 | 381.17392 | 145.11063 | 2.00498  | 26941     | 1       | 1    | <a href="#">1</a> |
| 200 | 1006.92 | 372.09032 | 374.09661 | 138.03200 | 2.00629  | 106109    | 1       | 1    | <a href="#">4</a> |
| 201 | 1014.64 | 441.14752 | 443.15374 | 207.08920 | 2.00623  | 35781     | 1       | 1    | <a href="#">3</a> |
| 202 | 1016.48 | 427.13226 | 429.13809 | 193.07394 | 2.00583  | 18200     | 1       | 1    | <a href="#">3</a> |
| 203 | 1019.82 | 312.08485 | 314.09115 | 156.05306 | 2.00630  | 839000    | 2       | 2    | <a href="#">3</a> |
| 204 | 1026.08 | 457.14136 | 459.14810 | 223.08304 | 2.00675  | 15000     | 1       | 1    | <a href="#">1</a> |
| 205 | 1028.54 | 407.16419 | 409.17041 | 173.10587 | 2.00622  | 146750    | 1       | 1    | <a href="#">4</a> |
| 206 | 1034.98 | 413.15418 | 415.16000 | 179.09586 | 2.00581  | 573781    | 1       | 1    | <a href="#">2</a> |
| 207 | 1037.61 | 347.11234 | 349.11957 | 226.10804 | 2.00724  | 13122     | 2       | 2    | <a href="#">1</a> |
| 208 | 1039.57 | 367.60760 | 369.61494 | 267.09855 | 2.00734  | 318000    | 2       | 2    | <a href="#">2</a> |
| 209 | 1042.57 | 356.09962 | 358.10434 | 244.08259 | 2.00472  | 7290      | 2       | 2    | <a href="#">1</a> |
| 210 | 1047.28 | 375.60520 | 377.61174 | 283.09376 | 2.00654  | 88753     | 2       | 2    | <a href="#">2</a> |
| 211 | 1048.79 | 366.10141 | 368.10676 | 132.04309 | 2.00535  | 34500     | 1       | 1    | <a href="#">7</a> |
| 212 | 1063.17 | 379.16995 | 381.17633 | 145.11163 | 2.00639  | 2143750   | 1       | 1    | <a href="#">1</a> |
| 213 | 1066.14 | 389.12813 | 391.13395 | 155.06981 | 2.00582  | 90838     | 1       | 1    | <a href="#">1</a> |



| #   | RT (s)  | mz_light  | mz_heavy  | mz        | distance | int_light | nCharge | nTag | Possible hits     |
|-----|---------|-----------|-----------|-----------|----------|-----------|---------|------|-------------------|
| 214 | 1067.29 | 312.59492 | 314.60143 | 157.07320 | 2.00651  | 563481    | 2       | 2    | <a href="#">2</a> |
| 215 | 1070.56 | 339.09654 | 341.10372 | 210.07643 | 2.00718  | 11269     | 2       | 2    | <a href="#">1</a> |
| 216 | 1078.28 | 356.09410 | 358.10140 | 244.07156 | 2.00729  | 28069     | 2       | 2    | <a href="#">3</a> |
| 217 | 1086.58 | 382.10946 | 384.11536 | 296.10227 | 2.00590  | 7533      | 2       | 2    | <a href="#">1</a> |
| 218 | 1093.63 | 389.11939 | 391.12549 | 310.12215 | 2.00609  | 6790      | 2       | 2    | <a href="#">1</a> |
| 219 | 1097.31 | 487.15238 | 489.15885 | 253.09406 | 2.00647  | 16150     | 1       | 1    | <a href="#">1</a> |
| 220 | 1098.67 | 541.14297 | 543.14710 | 307.08465 | 2.00413  | 9710      | 1       | 1    | <a href="#">1</a> |
| 221 | 1100.11 | 356.09358 | 358.10081 | 244.07053 | 2.00723  | 40294     | 2       | 2    | <a href="#">2</a> |
| 222 | 1100.38 | 298.08804 | 300.09521 | 128.05945 | 2.00717  | 538375    | 2       | 2    | <a href="#">1</a> |
| 223 | 1109.55 | 466.17945 | 468.18461 | 232.12113 | 2.00516  | 11031     | 1       | 1    | <a href="#">1</a> |
| 224 | 1110.73 | 356.09422 | 358.10090 | 244.07180 | 2.00668  | 248125    | 2       | 2    | <a href="#">3</a> |
| 225 | 1117.69 | 328.13365 | 330.14152 | 188.15066 | 2.00786  | 9650      | 2       | 2    | <a href="#">1</a> |
| 226 | 1124.66 | 423.14240 | 425.14653 | 189.08408 | 2.00414  | 8380      | 1       | 1    | <a href="#">1</a> |
| 227 | 1130.88 | 348.11413 | 350.12264 | 228.11163 | 2.00850  | 32100     | 2       | 2    | <a href="#">1</a> |
| 228 | 1134.33 | 328.11714 | 330.12356 | 188.11764 | 2.00643  | 57016     | 2       | 2    | <a href="#">3</a> |
| 229 | 1140.53 | 386.10673 | 388.11380 | 152.04841 | 2.00707  | 8720      | 1       | 1    | <a href="#">9</a> |
| 230 | 1143.63 | 528.16246 | 532.17549 | 61.05312  | 4.01303  | 52644     | 1       | 2    | <a href="#">1</a> |
| 231 | 1145.62 | 321.10926 | 323.11535 | 174.10188 | 2.00609  | 35200     | 2       | 2    | <a href="#">1</a> |
| 232 | 1153.10 | 292.10594 | 294.11229 | 116.09524 | 2.00635  | 41381     | 2       | 2    | <a href="#">1</a> |
| 233 | 1153.63 | 379.16944 | 381.17540 | 145.11112 | 2.00596  | 379156    | 1       | 1    | <a href="#">1</a> |
| 234 | 1183.58 | 693.16709 | 697.18175 | 226.05775 | 4.01466  | 12700     | 1       | 2    | <a href="#">1</a> |
| 235 | 1187.80 | 346.08548 | 348.09120 | 112.02716 | 2.00572  | 32000     | 1       | 1    | <a href="#">1</a> |
| 236 | 1196.40 | 427.16945 | 429.17523 | 193.11113 | 2.00578  | 371219    | 1       | 1    | <a href="#">2</a> |
| 237 | 1199.57 | 335.16715 | 337.17351 | 202.21767 | 2.00635  | 20450     | 2       | 2    | <a href="#">1</a> |

| #   | RT (s)  | mz_light  | mz_heavy  | mz        | distance | int_light | nCharge | nTag | Possible hits     |
|-----|---------|-----------|-----------|-----------|----------|-----------|---------|------|-------------------|
| 238 | 1215.62 | 403.14390 | 405.15022 | 169.08558 | 2.00633  | 11850     | 1       | 1    | <a href="#">2</a> |
| 239 | 1225.89 | 325.09802 | 327.10475 | 182.07941 | 2.00673  | 661500    | 2       | 2    | <a href="#">4</a> |
| 240 | 1227.31 | 414.12389 | 416.13048 | 180.06557 | 2.00658  | 35853     | 1       | 1    | <a href="#">3</a> |
| 241 | 1229.02 | 373.08570 | 375.09071 | 139.02738 | 2.00501  | 15050     | 1       | 1    | <a href="#">2</a> |
| 242 | 1229.78 | 386.10619 | 388.11146 | 152.04787 | 2.00527  | 26500     | 1       | 1    | <a href="#">9</a> |
| 243 | 1263.07 | 437.17342 | 439.18081 | 203.11510 | 2.00739  | 30275     | 1       | 1    | <a href="#">1</a> |
| 244 | 1269.01 | 373.12257 | 375.12872 | 278.12850 | 2.00615  | 17950     | 2       | 2    | <a href="#">3</a> |
| 245 | 1284.23 | 598.10105 | 600.10475 | 364.04273 | 2.00370  | 11340     | 1       | 1    | <a href="#">1</a> |
| 246 | 1298.78 | 302.07811 | 304.08615 | 136.03958 | 2.00803  | 6970      | 2       | 2    | <a href="#">1</a> |
| 247 | 1306.20 | 435.19433 | 437.20016 | 201.13601 | 2.00583  | 23763     | 1       | 1    | <a href="#">1</a> |
| 248 | 1308.32 | 354.11613 | 356.12235 | 120.05781 | 2.00622  | 190583    | 1       | 1    | <a href="#">2</a> |
| 249 | 1320.01 | 354.11670 | 356.12358 | 120.05838 | 2.00689  | 821875    | 1       | 1    | <a href="#">2</a> |
| 250 | 1325.81 | 338.59329 | 340.60018 | 209.06993 | 2.00689  | 24400     | 2       | 2    | <a href="#">1</a> |
| 251 | 1331.07 | 345.60138 | 347.60789 | 223.08612 | 2.00652  | 34638     | 2       | 2    | <a href="#">1</a> |
| 252 | 1352.47 | 297.59040 | 299.59735 | 127.06417 | 2.00694  | 57313     | 2       | 2    | <a href="#">2</a> |
| 253 | 1353.41 | 577.15698 | 581.16941 | 110.04764 | 4.01243  | 21538     | 1       | 2    | <a href="#">1</a> |
| 254 | 1362.27 | 308.58151 | 310.58939 | 149.04638 | 2.00788  | 29494     | 2       | 2    | <a href="#">1</a> |
| 255 | 1363.36 | 313.59304 | 315.59988 | 159.06944 | 2.00684  | 37797     | 2       | 2    | <a href="#">1</a> |
| 256 | 1367.48 | 577.15696 | 581.17035 | 110.04762 | 4.01339  | 27553     | 1       | 2    | <a href="#">1</a> |
| 257 | 1375.96 | 344.10595 | 346.11224 | 110.04763 | 2.00629  | 33750     | 1       | 1    | <a href="#">1</a> |
| 258 | 1378.47 | 328.13459 | 330.14174 | 188.15255 | 2.00715  | 9450      | 2       | 2    | <a href="#">1</a> |
| 259 | 1385.41 | 302.07785 | 304.08488 | 136.03906 | 2.00703  | 36913     | 2       | 2    | <a href="#">1</a> |
| 260 | 1394.42 | 612.26697 | 616.28060 | 145.15763 | 4.01364  | 55681     | 1       | 2    | <a href="#">1</a> |
| 261 | 1425.70 | 323.60645 | 325.61317 | 179.09626 | 2.00672  | 12753     | 2       | 2    | <a href="#">2</a> |

| #   | RT (s)  | mz_light  | mz_heavy  | mz        | distance | int_light | nCharge | nTag | Possible hits      |
|-----|---------|-----------|-----------|-----------|----------|-----------|---------|------|--------------------|
| 262 | 1486.25 | 669.32514 | 673.33790 | 202.21580 | 4.01276  | 15800     | 1       | 2    | <a href="#">1</a>  |
| 263 | 1486.89 | 570.29100 | 572.29316 | 336.23268 | 2.00216  | 11450     | 1       | 1    | <a href="#">22</a> |
| 264 | 1493.26 | 685.32688 | 687.33352 | 451.26856 | 2.00664  | 11730     | 1       | 1    | <a href="#">2</a>  |
| 265 | 1499.84 | 320.06730 | 322.07331 | 172.01796 | 2.00601  | 1060000   | 2       | 2    | <a href="#">1</a>  |
| 266 | 1500.01 | 319.06653 | 321.07326 | 170.01643 | 2.00673  | 2623328   | 2       | 2    | <a href="#">1</a>  |
| 267 | 1500.28 | 403.06362 | 405.06748 | 169.00530 | 2.00387  | 41691     | 1       | 1    | <a href="#">1</a>  |
| 268 | 1506.67 | 584.30725 | 586.30957 | 350.24893 | 2.00232  | 9120      | 1       | 1    | <a href="#">5</a>  |
| 269 | 1513.80 | 735.34388 | 737.35017 | 501.28556 | 2.00629  | 94963     | 1       | 1    | <a href="#">5</a>  |
| 270 | 1523.31 | 711.34181 | 713.35179 | 477.28349 | 2.00998  | 7930      | 1       | 1    | <a href="#">2</a>  |
| 271 | 1532.61 | 761.35818 | 763.36785 | 527.29986 | 2.00967  | 13400     | 1       | 1    | <a href="#">4</a>  |
| 272 | 1541.38 | 470.23568 | 472.24189 | 236.17736 | 2.00621  | 69206     | 1       | 1    | <a href="#">1</a>  |
| 273 | 1549.90 | 533.33992 | 535.34661 | 299.28160 | 2.00669  | 57257     | 1       | 1    | <a href="#">3</a>  |
| 274 | 1566.31 | 535.35505 | 537.36188 | 301.29673 | 2.00683  | 21875     | 1       | 1    | <a href="#">1</a>  |
| 275 | 1574.10 | 489.31422 | 491.32056 | 255.25590 | 2.00634  | 104750    | 1       | 1    | <a href="#">1</a>  |
| 276 | 1580.99 | 515.32889 | 517.33456 | 281.27057 | 2.00567  | 7580      | 1       | 1    | <a href="#">1</a>  |
| 277 | 1602.43 | 687.34515 | 689.35050 | 453.28683 | 2.00535  | 6765      | 1       | 1    | <a href="#">2</a>  |
| 278 | 1619.19 | 713.35902 | 715.36405 | 479.30070 | 2.00503  | 21000     | 1       | 1    | <a href="#">4</a>  |
| 279 | 1631.72 | 713.35865 | 715.36492 | 479.30033 | 2.00626  | 19620     | 1       | 1    | <a href="#">4</a>  |
| 280 | 1689.44 | 671.34698 | 673.35294 | 437.28866 | 2.00596  | 7760      | 1       | 1    | <a href="#">1</a>  |
| 281 | 1707.69 | 671.34857 | 673.35182 | 437.29025 | 2.00325  | 7600      | 1       | 1    | <a href="#">1</a>  |

Table S1C. Identification of cellular metabolites by searching the accurate mass of the peak pairs against the EML library with one reaction in MCID.

| #  | RT (s) | mz_light  | mz_heavy  | mz        | distance | int_light | nCharge | nTag | Possible hits      |
|----|--------|-----------|-----------|-----------|----------|-----------|---------|------|--------------------|
| 1  | 125.47 | 425.18512 | 427.19137 | 191.12680 | 2.00625  | 94200     | 1       | 1    | <a href="#">2</a>  |
| 2  | 126.55 | 426.16865 | 428.17552 | 192.11033 | 2.00687  | 15700     | 1       | 1    | <a href="#">4</a>  |
| 3  | 128.55 | 375.07841 | 377.08489 | 141.02009 | 2.00648  | 1090000   | 1       | 1    | <a href="#">6</a>  |
| 4  | 130.55 | 367.09644 | 369.10373 | 133.03812 | 2.00730  | 1100000   | 1       | 1    | <a href="#">28</a> |
| 5  | 134.16 | 411.16900 | 413.17542 | 177.11068 | 2.00641  | 30500     | 1       | 1    | <a href="#">4</a>  |
| 6  | 135.60 | 449.11410 | 451.11910 | 215.05578 | 2.00500  | 29175     | 1       | 1    | <a href="#">4</a>  |
| 7  | 135.83 | 381.11109 | 383.11661 | 147.05277 | 2.00552  | 14850     | 1       | 1    | <a href="#">51</a> |
| 8  | 136.16 | 366.11233 | 368.11887 | 132.05401 | 2.00654  | 3630000   | 1       | 1    | <a href="#">12</a> |
| 9  | 150.91 | 675.24145 | 677.24905 | 441.18313 | 2.00760  | 11385     | 1       | 1    | <a href="#">7</a>  |
| 10 | 151.91 | 380.12827 | 382.13458 | 146.06995 | 2.00631  | 5385000   | 1       | 1    | <a href="#">29</a> |
| 11 | 152.99 | 280.10057 | 282.10707 | 46.04225  | 2.00650  | 533125    | 1       | 1    | <a href="#">20</a> |
| 12 | 154.60 | 449.11495 | 451.12088 | 215.05663 | 2.00594  | 295375    | 1       | 1    | <a href="#">4</a>  |
| 13 | 157.45 | 474.14296 | 476.15005 | 240.08464 | 2.00708  | 11725     | 1       | 1    | <a href="#">25</a> |
| 14 | 166.46 | 675.24238 | 677.24879 | 441.18406 | 2.00640  | 30724     | 1       | 1    | <a href="#">7</a>  |
| 15 | 167.81 | 449.11502 | 451.12073 | 215.05670 | 2.00571  | 358969    | 1       | 1    | <a href="#">4</a>  |
| 16 | 170.33 | 474.14361 | 476.15037 | 240.08529 | 2.00676  | 13441     | 1       | 1    | <a href="#">29</a> |
| 17 | 182.09 | 573.13205 | 575.13766 | 339.07373 | 2.00561  | 121653    | 1       | 1    | <a href="#">4</a>  |
| 18 | 182.60 | 366.11259 | 368.11900 | 132.05427 | 2.00641  | 4930000   | 1       | 1    | <a href="#">12</a> |
| 19 | 182.93 | 589.12591 | 591.13139 | 355.06759 | 2.00548  | 13294     | 1       | 1    | <a href="#">8</a>  |
| 20 | 184.50 | 389.12732 | 391.13404 | 155.06900 | 2.00672  | 18850     | 1       | 1    | <a href="#">14</a> |

| #  | RT (s) | mz_light  | mz_heavy  | mz        | distance | int_light | nCharge | nTag | Possible hits      |
|----|--------|-----------|-----------|-----------|----------|-----------|---------|------|--------------------|
| 21 | 185.26 | 381.11133 | 383.11619 | 147.05301 | 2.00485  | 30650     | 1       | 1    | <a href="#">51</a> |
| 22 | 187.53 | 410.17510 | 412.18165 | 176.11678 | 2.00655  | 8520      | 1       | 1    | <a href="#">12</a> |
| 23 | 193.02 | 675.24287 | 677.24785 | 441.18455 | 2.00498  | 13244     | 1       | 1    | <a href="#">7</a>  |
| 24 | 197.89 | 389.12769 | 391.13316 | 155.06937 | 2.00546  | 14900     | 1       | 1    | <a href="#">14</a> |
| 25 | 200.90 | 359.07348 | 361.07845 | 125.01516 | 2.00497  | 150650    | 1       | 1    | <a href="#">5</a>  |
| 26 | 201.63 | 535.17213 | 537.17810 | 301.11381 | 2.00597  | 17100     | 1       | 1    | <a href="#">10</a> |
| 27 | 201.90 | 582.25895 | 584.26552 | 348.20063 | 2.00657  | 15100     | 1       | 1    | <a href="#">1</a>  |
| 28 | 206.70 | 675.24158 | 677.24828 | 441.18326 | 2.00670  | 13200     | 1       | 1    | <a href="#">7</a>  |
| 29 | 208.77 | 388.10798 | 390.11436 | 154.04966 | 2.00638  | 591813    | 1       | 1    | <a href="#">11</a> |
| 30 | 211.31 | 389.12757 | 391.13309 | 155.06925 | 2.00552  | 23100     | 1       | 1    | <a href="#">14</a> |
| 31 | 212.64 | 380.12853 | 382.13487 | 146.07021 | 2.00634  | 7150000   | 1       | 1    | <a href="#">29</a> |
| 32 | 214.39 | 517.15048 | 519.15673 | 283.09216 | 2.00626  | 57238     | 1       | 1    | <a href="#">38</a> |
| 33 | 215.35 | 359.07352 | 361.07922 | 125.01520 | 2.00569  | 257066    | 1       | 1    | <a href="#">5</a>  |
| 34 | 216.54 | 513.18919 | 515.19486 | 279.13087 | 2.00566  | 16439     | 1       | 1    | <a href="#">15</a> |
| 35 | 218.29 | 675.24422 | 677.24892 | 441.18590 | 2.00470  | 17150     | 1       | 1    | <a href="#">7</a>  |
| 36 | 220.65 | 339.10168 | 341.10819 | 105.04336 | 2.00652  | 947000    | 1       | 1    | <a href="#">21</a> |
| 37 | 223.22 | 389.09338 | 391.10004 | 155.03506 | 2.00666  | 185500    | 1       | 1    | <a href="#">5</a>  |
| 38 | 227.01 | 517.15056 | 519.15586 | 283.09224 | 2.00530  | 40500     | 1       | 1    | <a href="#">39</a> |
| 39 | 230.26 | 365.11736 | 367.12365 | 131.05904 | 2.00628  | 3980000   | 1       | 1    | <a href="#">60</a> |
| 40 | 231.94 | 715.24816 | 717.25234 | 481.18984 | 2.00418  | 7860      | 1       | 1    | <a href="#">6</a>  |
| 41 | 235.66 | 783.23635 | 785.24108 | 549.17803 | 2.00474  | 42800     | 1       | 1    | <a href="#">2</a>  |
| 42 | 239.27 | 517.15025 | 519.15680 | 283.09193 | 2.00655  | 123781    | 1       | 1    | <a href="#">38</a> |
| 43 | 241.67 | 408.17093 | 410.17733 | 174.11261 | 2.00640  | 422000    | 1       | 1    | <a href="#">6</a>  |
| 44 | 243.67 | 339.10156 | 341.10796 | 105.04324 | 2.00640  | 716000    | 1       | 1    | <a href="#">21</a> |

| #  | RT (s) | mz_light  | mz_heavy  | mz        | distance | int_light | nCharge | nTag | Possible hits      |
|----|--------|-----------|-----------|-----------|----------|-----------|---------|------|--------------------|
| 45 | 245.84 | 293.10647 | 295.11258 | 59.04815  | 2.00611  | 36719     | 1       | 1    | <a href="#">1</a>  |
| 46 | 245.96 | 380.12882 | 382.13501 | 146.07050 | 2.00619  | 1151250   | 1       | 1    | <a href="#">29</a> |
| 47 | 246.46 | 463.12992 | 465.13591 | 229.07160 | 2.00599  | 21056     | 1       | 1    | <a href="#">8</a>  |
| 48 | 251.50 | 403.14269 | 405.14879 | 169.08437 | 2.00611  | 18700     | 1       | 1    | <a href="#">11</a> |
| 49 | 252.68 | 485.15814 | 487.16431 | 251.09982 | 2.00618  | 10600     | 1       | 1    | <a href="#">39</a> |
| 50 | 253.98 | 397.12472 | 399.13073 | 163.06640 | 2.00602  | 70800     | 1       | 1    | <a href="#">5</a>  |
| 51 | 256.27 | 675.24271 | 677.24920 | 441.18439 | 2.00649  | 48894     | 1       | 1    | <a href="#">7</a>  |
| 52 | 257.36 | 380.13084 | 382.13712 | 146.07252 | 2.00627  | 1395000   | 1       | 1    | <a href="#">10</a> |
| 53 | 258.35 | 513.18902 | 515.19378 | 279.13070 | 2.00476  | 9205      | 1       | 1    | <a href="#">16</a> |
| 54 | 259.28 | 381.11129 | 383.11740 | 147.05297 | 2.00611  | 98400     | 1       | 1    | <a href="#">51</a> |
| 55 | 261.28 | 424.11749 | 426.12373 | 190.05917 | 2.00624  | 12200     | 1       | 1    | <a href="#">15</a> |
| 56 | 262.06 | 408.17053 | 410.17718 | 174.11221 | 2.00664  | 910375    | 1       | 1    | <a href="#">6</a>  |
| 57 | 262.21 | 493.17368 | 495.17912 | 259.11536 | 2.00544  | 11975     | 1       | 1    | <a href="#">10</a> |
| 58 | 262.60 | 414.12169 | 416.12685 | 180.06337 | 2.00516  | 14375     | 1       | 1    | <a href="#">87</a> |
| 59 | 263.63 | 509.16934 | 511.17527 | 275.11102 | 2.00592  | 10886     | 1       | 1    | <a href="#">16</a> |
| 60 | 265.42 | 417.15810 | 419.16464 | 183.09978 | 2.00654  | 18738     | 1       | 1    | <a href="#">8</a>  |
| 61 | 267.30 | 366.11246 | 368.11905 | 132.05414 | 2.00658  | 2732500   | 1       | 1    | <a href="#">12</a> |
| 62 | 267.96 | 587.14581 | 589.15073 | 353.08749 | 2.00492  | 7780      | 1       | 1    | <a href="#">6</a>  |
| 63 | 270.46 | 502.13862 | 504.14406 | 268.08030 | 2.00544  | 48378     | 1       | 1    | <a href="#">23</a> |
| 64 | 270.70 | 535.18251 | 537.18613 | 301.12419 | 2.00362  | 11400     | 1       | 1    | <a href="#">2</a>  |
| 65 | 273.53 | 675.24242 | 677.24899 | 441.18410 | 2.00656  | 57500     | 1       | 1    | <a href="#">7</a>  |
| 66 | 274.20 | 657.23177 | 659.23769 | 423.17345 | 2.00592  | 14500     | 1       | 1    | <a href="#">14</a> |
| 67 | 274.21 | 513.18572 | 515.19603 | 279.12740 | 2.01031  | 11050     | 1       | 1    | <a href="#">3</a>  |
| 68 | 274.87 | 414.12151 | 416.12753 | 180.06319 | 2.00602  | 25619     | 1       | 1    | <a href="#">87</a> |

| #  | RT (s) | mz_light  | mz_heavy  | mz        | distance | int_light | nCharge | nTag | Possible hits      |
|----|--------|-----------|-----------|-----------|----------|-----------|---------|------|--------------------|
| 69 | 275.23 | 489.13251 | 491.13872 | 255.07419 | 2.00621  | 89125     | 1       | 1    | <a href="#">16</a> |
| 70 | 275.78 | 501.11490 | 505.12821 | 34.00556  | 4.01330  | 8610      | 1       | 2    | <a href="#">8</a>  |
| 71 | 277.53 | 417.15907 | 419.16418 | 183.10075 | 2.00510  | 38134     | 1       | 1    | <a href="#">8</a>  |
| 72 | 278.70 | 365.11775 | 367.12414 | 131.05943 | 2.00639  | 5270000   | 1       | 1    | <a href="#">60</a> |
| 73 | 283.75 | 702.25257 | 704.25909 | 468.19425 | 2.00652  | 6130      | 1       | 1    | <a href="#">5</a>  |
| 74 | 287.55 | 408.17227 | 410.17845 | 174.11395 | 2.00618  | 1516654   | 1       | 1    | <a href="#">3</a>  |
| 75 | 288.82 | 502.13914 | 504.14539 | 268.08082 | 2.00625  | 67813     | 1       | 1    | <a href="#">23</a> |
| 76 | 290.72 | 479.15977 | 481.16644 | 245.10145 | 2.00667  | 10735     | 1       | 1    | <a href="#">14</a> |
| 77 | 294.79 | 380.12789 | 382.13457 | 146.06957 | 2.00668  | 8270000   | 1       | 1    | <a href="#">29</a> |
| 78 | 297.76 | 702.25317 | 704.25987 | 468.19485 | 2.00670  | 14100     | 1       | 1    | <a href="#">5</a>  |
| 79 | 300.73 | 535.18142 | 537.18586 | 301.12310 | 2.00444  | 24900     | 1       | 1    | <a href="#">2</a>  |
| 80 | 303.29 | 422.20971 | 424.21525 | 188.15139 | 2.00555  | 12800     | 1       | 1    | <a href="#">4</a>  |
| 81 | 304.28 | 489.13277 | 491.13910 | 255.07445 | 2.00633  | 119188    | 1       | 1    | <a href="#">16</a> |
| 82 | 305.88 | 513.18877 | 515.19398 | 279.13045 | 2.00521  | 21138     | 1       | 1    | <a href="#">16</a> |
| 83 | 307.52 | 367.09617 | 369.10188 | 133.03785 | 2.00571  | 73800     | 1       | 1    | <a href="#">28</a> |
| 84 | 308.56 | 399.10441 | 401.11003 | 165.04609 | 2.00562  | 87138     | 1       | 1    | <a href="#">7</a>  |
| 85 | 312.66 | 587.13034 | 589.13600 | 353.07202 | 2.00566  | 39200     | 1       | 1    | <a href="#">6</a>  |
| 86 | 313.95 | 353.11661 | 355.12308 | 119.05829 | 2.00647  | 17095     | 1       | 1    | <a href="#">35</a> |
| 87 | 315.35 | 422.20975 | 424.21408 | 188.15143 | 2.00433  | 18800     | 1       | 1    | <a href="#">4</a>  |
| 88 | 316.47 | 372.14849 | 374.15487 | 138.09017 | 2.00638  | 18000     | 1       | 1    | <a href="#">3</a>  |
| 89 | 319.31 | 381.11415 | 383.11874 | 147.05583 | 2.00459  | 1200625   | 1       | 1    | <a href="#">4</a>  |
| 90 | 323.31 | 515.17349 | 517.17615 | 281.11517 | 2.00267  | 16400     | 1       | 1    | <a href="#">32</a> |
| 91 | 324.58 | 436.15304 | 438.15853 | 202.09472 | 2.00549  | 15250     | 1       | 1    | <a href="#">19</a> |
| 92 | 324.66 | 399.10460 | 401.11050 | 165.04628 | 2.00591  | 108188    | 1       | 1    | <a href="#">7</a>  |

| #   | RT (s) | mz_light  | mz_heavy  | mz        | distance | int_light | nCharge | nTag | Possible hits      |
|-----|--------|-----------|-----------|-----------|----------|-----------|---------|------|--------------------|
| 93  | 326.59 | 535.17258 | 537.17856 | 301.11426 | 2.00598  | 13145     | 1       | 1    | <a href="#">10</a> |
| 94  | 326.75 | 499.17528 | 501.17960 | 265.11696 | 2.00433  | 22900     | 1       | 1    | <a href="#">39</a> |
| 95  | 328.26 | 353.11570 | 355.12276 | 119.05738 | 2.00706  | 29640     | 1       | 1    | <a href="#">35</a> |
| 96  | 328.76 | 388.10771 | 390.11345 | 154.04939 | 2.00574  | 60800     | 1       | 1    | <a href="#">11</a> |
| 97  | 329.03 | 513.19053 | 515.19597 | 279.13221 | 2.00544  | 91972     | 1       | 1    | <a href="#">15</a> |
| 98  | 329.51 | 436.20105 | 438.20708 | 202.14273 | 2.00603  | 152100    | 1       | 1    | <a href="#">4</a>  |
| 99  | 331.76 | 691.26982 | 693.27982 | 457.21150 | 2.01000  | 11200     | 1       | 1    | <a href="#">8</a>  |
| 100 | 331.76 | 731.21454 | 733.22323 | 497.15622 | 2.00869  | 6310      | 1       | 1    | <a href="#">8</a>  |
| 101 | 334.98 | 339.10164 | 341.10806 | 105.04332 | 2.00642  | 4457328   | 1       | 1    | <a href="#">21</a> |
| 102 | 335.26 | 747.22248 | 749.22513 | 513.16416 | 2.00265  | 18500     | 1       | 1    | <a href="#">7</a>  |
| 103 | 336.70 | 381.11222 | 383.11861 | 147.05390 | 2.00639  | 4248125   | 1       | 1    | <a href="#">55</a> |
| 104 | 338.70 | 769.20559 | 771.20556 | 535.14727 | 1.99997  | 15800     | 1       | 1    | <a href="#">2</a>  |
| 105 | 341.05 | 485.15870 | 487.16574 | 251.10038 | 2.00704  | 5730      | 1       | 1    | <a href="#">39</a> |
| 106 | 341.33 | 436.15645 | 438.16104 | 202.09813 | 2.00459  | 18200     | 1       | 1    | <a href="#">1</a>  |
| 107 | 342.77 | 501.15562 | 503.16298 | 267.09730 | 2.00736  | 757001    | 1       | 1    | <a href="#">50</a> |
| 108 | 348.06 | 399.10454 | 401.11017 | 165.04622 | 2.00563  | 88742     | 1       | 1    | <a href="#">7</a>  |
| 109 | 348.18 | 436.20196 | 438.20781 | 202.14364 | 2.00585  | 303438    | 1       | 1    | <a href="#">4</a>  |
| 110 | 353.42 | 691.27264 | 693.28047 | 457.21432 | 2.00784  | 11950     | 1       | 1    | <a href="#">7</a>  |
| 111 | 354.25 | 576.21113 | 578.21645 | 342.15281 | 2.00531  | 10695     | 1       | 1    | <a href="#">11</a> |
| 112 | 356.79 | 309.09095 | 311.09723 | 75.03263  | 2.00628  | 4960000   | 1       | 1    | <a href="#">21</a> |
| 113 | 357.74 | 403.14387 | 405.14969 | 169.08555 | 2.00581  | 281438    | 1       | 1    | <a href="#">11</a> |
| 114 | 358.65 | 438.13543 | 440.13997 | 204.07711 | 2.00454  | 21425     | 1       | 1    | <a href="#">5</a>  |
| 115 | 364.88 | 587.12900 | 589.13489 | 353.07068 | 2.00589  | 42675     | 1       | 1    | <a href="#">4</a>  |
| 116 | 367.31 | 381.11247 | 383.11880 | 147.05415 | 2.00633  | 5609727   | 1       | 1    | <a href="#">55</a> |



| #   | RT (s) | mz_light  | mz_heavy  | mz        | distance | int_light | nCharge | nTag | Possible hits      |
|-----|--------|-----------|-----------|-----------|----------|-----------|---------|------|--------------------|
| 117 | 372.45 | 449.25752 | 451.26373 | 215.19920 | 2.00621  | 10503     | 1       | 1    | <a href="#">2</a>  |
| 118 | 372.65 | 576.21203 | 578.21794 | 342.15371 | 2.00592  | 13803     | 1       | 1    | <a href="#">11</a> |
| 119 | 374.81 | 365.11747 | 367.12385 | 131.05915 | 2.00639  | 4229414   | 1       | 1    | <a href="#">60</a> |
| 120 | 378.65 | 353.11761 | 355.12394 | 119.05929 | 2.00633  | 2992813   | 1       | 1    | <a href="#">35</a> |
| 121 | 379.30 | 292.11189 | 294.11810 | 58.05357  | 2.00621  | 263000    | 1       | 1    | <a href="#">1</a>  |
| 122 | 379.46 | 478.16426 | 480.16989 | 244.10594 | 2.00562  | 7360      | 1       | 1    | <a href="#">15</a> |
| 123 | 381.46 | 348.10231 | 350.10893 | 114.04399 | 2.00662  | 725734    | 1       | 1    | <a href="#">12</a> |
| 124 | 388.10 | 462.16913 | 464.17576 | 228.11081 | 2.00663  | 12300     | 1       | 1    | <a href="#">8</a>  |
| 125 | 388.42 | 417.15819 | 419.16465 | 183.09987 | 2.00646  | 29669     | 1       | 1    | <a href="#">8</a>  |
| 126 | 388.72 | 519.19061 | 521.19662 | 285.13229 | 2.00600  | 22688     | 1       | 1    | <a href="#">9</a>  |
| 127 | 389.47 | 290.56655 | 292.57175 | 113.01646 | 2.00520  | 15850     | 2       | 2    | <a href="#">1</a>  |
| 128 | 390.47 | 319.58780 | 321.59381 | 171.05896 | 2.00601  | 18225     | 2       | 2    | <a href="#">1</a>  |
| 129 | 393.56 | 555.15756 | 557.16224 | 321.09924 | 2.00468  | 27994     | 1       | 1    | <a href="#">9</a>  |
| 130 | 395.40 | 373.14270 | 375.14998 | 139.08438 | 2.00728  | 12800     | 1       | 1    | <a href="#">2</a>  |
| 131 | 397.93 | 348.10208 | 350.10861 | 114.04376 | 2.00653  | 541836    | 1       | 1    | <a href="#">12</a> |
| 132 | 398.11 | 587.12937 | 589.13618 | 353.07105 | 2.00681  | 94400     | 1       | 1    | <a href="#">4</a>  |
| 133 | 399.69 | 290.56659 | 292.57278 | 113.01654 | 2.00619  | 10397     | 2       | 2    | <a href="#">1</a>  |
| 134 | 399.93 | 379.13280 | 381.13921 | 145.07448 | 2.00641  | 215625    | 1       | 1    | <a href="#">54</a> |
| 135 | 402.54 | 422.18553 | 424.19106 | 188.12721 | 2.00553  | 11240     | 1       | 1    | <a href="#">7</a>  |
| 136 | 406.94 | 319.58814 | 321.59383 | 171.05964 | 2.00569  | 12450     | 2       | 2    | <a href="#">1</a>  |
| 137 | 407.85 | 387.12216 | 389.12880 | 153.06384 | 2.00664  | 26000     | 1       | 1    | <a href="#">10</a> |
| 138 | 408.69 | 519.19132 | 521.19627 | 285.13300 | 2.00495  | 21717     | 1       | 1    | <a href="#">10</a> |
| 139 | 413.02 | 647.24939 | 649.25565 | 413.19107 | 2.00625  | 8815      | 1       | 1    | <a href="#">6</a>  |
| 140 | 415.11 | 411.14062 | 413.14637 | 177.08230 | 2.00576  | 27588     | 1       | 1    | <a href="#">6</a>  |

| #   | RT (s) | mz_light  | mz_heavy  | mz        | distance | int_light | nCharge | nTag | Possible hits      |
|-----|--------|-----------|-----------|-----------|----------|-----------|---------|------|--------------------|
| 141 | 415.48 | 353.11755 | 355.12423 | 119.05923 | 2.00668  | 2729063   | 1       | 1    | <a href="#">35</a> |
| 142 | 420.86 | 431.17413 | 433.17983 | 197.11581 | 2.00570  | 15038     | 1       | 1    | <a href="#">3</a>  |
| 143 | 421.02 | 295.11164 | 297.11822 | 61.05332  | 2.00658  | 5788438   | 1       | 1    | <a href="#">15</a> |
| 144 | 421.38 | 462.17009 | 464.17678 | 228.11177 | 2.00668  | 296900    | 1       | 1    | <a href="#">8</a>  |
| 145 | 421.46 | 405.15862 | 407.16505 | 171.10030 | 2.00644  | 14600     | 1       | 1    | <a href="#">6</a>  |
| 146 | 421.87 | 673.26040 | 675.27058 | 439.20208 | 2.01018  | 23475     | 1       | 1    | <a href="#">5</a>  |
| 147 | 424.37 | 395.12736 | 397.13316 | 161.06904 | 2.00580  | 20125     | 1       | 1    | <a href="#">48</a> |
| 148 | 424.86 | 323.10599 | 325.11256 | 89.04767  | 2.00657  | 39700     | 1       | 1    | <a href="#">38</a> |
| 149 | 427.87 | 625.19888 | 627.20489 | 391.14056 | 2.00602  | 12600     | 1       | 1    | <a href="#">21</a> |
| 150 | 429.28 | 363.14903 | 365.15467 | 129.09071 | 2.00563  | 298375    | 1       | 1    | <a href="#">4</a>  |
| 151 | 430.94 | 555.15792 | 557.16372 | 321.09960 | 2.00580  | 13672     | 1       | 1    | <a href="#">8</a>  |
| 152 | 433.15 | 491.19429 | 493.20221 | 257.13597 | 2.00792  | 16100     | 1       | 1    | <a href="#">6</a>  |
| 153 | 433.20 | 505.22178 | 507.22515 | 271.16346 | 2.00336  | 20065     | 1       | 1    | <a href="#">1</a>  |
| 154 | 433.40 | 479.23225 | 481.23903 | 245.17393 | 2.00678  | 245810    | 1       | 1    | <a href="#">6</a>  |
| 155 | 439.02 | 600.20052 | 602.20699 | 366.14220 | 2.00646  | 10503     | 1       | 1    | <a href="#">11</a> |
| 156 | 445.30 | 362.11810 | 364.12644 | 128.05978 | 2.00834  | 1001738   | 1       | 1    | <a href="#">16</a> |
| 157 | 447.57 | 462.17023 | 464.17701 | 228.11191 | 2.00678  | 545286    | 1       | 1    | <a href="#">8</a>  |
| 158 | 448.02 | 303.11583 | 305.12255 | 69.05751  | 2.00671  | 9495      | 1       | 1    | <a href="#">2</a>  |
| 159 | 448.90 | 477.18100 | 479.18642 | 243.12268 | 2.00541  | 33975     | 1       | 1    | <a href="#">8</a>  |
| 160 | 449.16 | 279.07998 | 281.08641 | 45.02166  | 2.00643  | 57400     | 1       | 1    | <a href="#">8</a>  |
| 161 | 450.73 | 334.12235 | 336.12878 | 100.06403 | 2.00643  | 374194    | 1       | 1    | <a href="#">3</a>  |
| 162 | 452.34 | 323.10658 | 325.11269 | 89.04826  | 2.00611  | 208720    | 1       | 1    | <a href="#">38</a> |
| 163 | 453.89 | 587.12965 | 589.13567 | 353.07133 | 2.00602  | 102000    | 1       | 1    | <a href="#">6</a>  |
| 164 | 453.95 | 350.15306 | 352.15991 | 116.09474 | 2.00684  | 269000    | 1       | 1    | <a href="#">9</a>  |

| #   | RT (s) | mz_light  | mz_heavy  | mz        | distance | int_light | nCharge | nTag | Possible hits      |
|-----|--------|-----------|-----------|-----------|----------|-----------|---------|------|--------------------|
| 165 | 454.49 | 491.19474 | 493.20177 | 257.13642 | 2.00703  | 23984     | 1       | 1    | <a href="#">6</a>  |
| 166 | 455.15 | 422.18630 | 424.19207 | 188.12798 | 2.00576  | 216875    | 1       | 1    | <a href="#">7</a>  |
| 167 | 456.17 | 378.22080 | 380.22800 | 144.16248 | 2.00720  | 28700     | 1       | 1    | <a href="#">2</a>  |
| 168 | 456.67 | 436.15357 | 438.16042 | 202.09525 | 2.00685  | 11839     | 1       | 1    | <a href="#">19</a> |
| 169 | 458.73 | 337.15906 | 339.16563 | 103.10074 | 2.00657  | 3258477   | 1       | 1    | <a href="#">5</a>  |
| 170 | 461.16 | 789.30865 | 791.31321 | 555.25033 | 2.00457  | 27581     | 1       | 1    | <a href="#">3</a>  |
| 171 | 462.18 | 787.30244 | 789.30771 | 553.24412 | 2.00528  | 66400     | 1       | 1    | <a href="#">4</a>  |
| 172 | 462.69 | 348.10128 | 350.10738 | 114.04296 | 2.00610  | 108031    | 1       | 1    | <a href="#">12</a> |
| 173 | 466.48 | 394.14419 | 396.15015 | 160.08587 | 2.00596  | 555063    | 1       | 1    | <a href="#">35</a> |
| 174 | 470.91 | 450.16884 | 452.17380 | 216.11052 | 2.00496  | 15625     | 1       | 1    | <a href="#">15</a> |
| 175 | 471.48 | 600.20092 | 602.20808 | 366.14260 | 2.00716  | 17388     | 1       | 1    | <a href="#">12</a> |
| 176 | 473.45 | 463.23755 | 465.24337 | 229.17923 | 2.00581  | 32647     | 1       | 1    | <a href="#">2</a>  |
| 177 | 474.92 | 539.21007 | 541.21466 | 305.15175 | 2.00459  | 9565      | 1       | 1    | <a href="#">8</a>  |
| 178 | 478.71 | 436.15412 | 438.15983 | 202.09580 | 2.00571  | 15388     | 1       | 1    | <a href="#">19</a> |
| 179 | 479.43 | 436.22513 | 438.23001 | 202.16681 | 2.00488  | 10288     | 1       | 1    | <a href="#">3</a>  |
| 180 | 483.12 | 351.13712 | 353.14330 | 117.07880 | 2.00618  | 30788     | 1       | 1    | <a href="#">38</a> |
| 181 | 493.83 | 483.14478 | 485.14973 | 249.08646 | 2.00496  | 20163     | 1       | 1    | <a href="#">41</a> |
| 182 | 496.63 | 431.17472 | 433.18042 | 197.11640 | 2.00570  | 12825     | 1       | 1    | <a href="#">3</a>  |
| 183 | 500.00 | 413.11983 | 415.12594 | 179.06151 | 2.00611  | 37131     | 1       | 1    | <a href="#">11</a> |
| 184 | 504.20 | 406.14277 | 408.14745 | 172.08445 | 2.00468  | 28370     | 1       | 1    | <a href="#">9</a>  |
| 185 | 505.02 | 337.12174 | 339.12804 | 103.06342 | 2.00631  | 53450     | 1       | 1    | <a href="#">45</a> |
| 186 | 508.30 | 353.11728 | 355.12351 | 119.05896 | 2.00623  | 416250    | 1       | 1    | <a href="#">35</a> |
| 187 | 509.37 | 361.19461 | 363.20096 | 127.13629 | 2.00635  | 96453     | 1       | 1    | <a href="#">1</a>  |
| 188 | 510.88 | 587.12257 | 589.13433 | 353.06425 | 2.01176  | 8330      | 1       | 1    | <a href="#">28</a> |

| #   | RT (s) | mz_light  | mz_heavy  | mz        | distance | int_light | nCharge | nTag | Possible hits      |
|-----|--------|-----------|-----------|-----------|----------|-----------|---------|------|--------------------|
| 189 | 511.82 | 531.14922 | 533.15339 | 297.09090 | 2.00418  | 12890     | 1       | 1    | <a href="#">10</a> |
| 190 | 512.08 | 478.16402 | 480.17014 | 244.10570 | 2.00611  | 19550     | 1       | 1    | <a href="#">15</a> |
| 191 | 512.43 | 367.13185 | 369.13840 | 133.07353 | 2.00655  | 16581     | 1       | 1    | <a href="#">40</a> |
| 192 | 514.37 | 392.16390 | 394.17012 | 158.10558 | 2.00622  | 30991     | 1       | 1    | <a href="#">6</a>  |
| 193 | 516.31 | 503.19628 | 505.20026 | 269.13796 | 2.00398  | 10105     | 1       | 1    | <a href="#">8</a>  |
| 194 | 516.31 | 395.12676 | 397.13366 | 161.06844 | 2.00690  | 13638     | 1       | 1    | <a href="#">46</a> |
| 195 | 523.10 | 625.19991 | 627.20721 | 391.14159 | 2.00730  | 12050     | 1       | 1    | <a href="#">22</a> |
| 196 | 523.74 | 476.22200 | 478.22800 | 242.16368 | 2.00600  | 20650     | 1       | 1    | <a href="#">4</a>  |
| 197 | 523.80 | 450.16974 | 452.17552 | 216.11142 | 2.00578  | 14538     | 1       | 1    | <a href="#">15</a> |
| 198 | 526.08 | 406.14310 | 408.14897 | 172.08478 | 2.00587  | 42838     | 1       | 1    | <a href="#">9</a>  |
| 199 | 526.29 | 408.15879 | 410.16518 | 174.10047 | 2.00639  | 85094     | 1       | 1    | <a href="#">35</a> |
| 200 | 528.64 | 351.13765 | 353.14416 | 117.07933 | 2.00651  | 221750    | 1       | 1    | <a href="#">38</a> |
| 201 | 528.76 | 587.12950 | 589.13479 | 353.07118 | 2.00529  | 24994     | 1       | 1    | <a href="#">6</a>  |
| 202 | 530.33 | 381.11275 | 383.11933 | 147.05443 | 2.00658  | 1034250   | 1       | 1    | <a href="#">55</a> |
| 203 | 532.04 | 503.19910 | 505.20247 | 269.14078 | 2.00337  | 12200     | 1       | 1    | <a href="#">1</a>  |
| 204 | 532.98 | 363.10161 | 365.10799 | 129.04329 | 2.00637  | 4520000   | 1       | 1    | <a href="#">28</a> |
| 205 | 535.65 | 517.14990 | 519.15657 | 283.09158 | 2.00667  | 18878     | 1       | 1    | <a href="#">38</a> |
| 206 | 539.26 | 450.17027 | 452.17599 | 216.11195 | 2.00573  | 21500     | 1       | 1    | <a href="#">15</a> |
| 207 | 541.82 | 578.21176 | 580.21804 | 344.15344 | 2.00629  | 26750     | 1       | 1    | <a href="#">1</a>  |
| 208 | 542.90 | 478.12954 | 480.13613 | 244.07122 | 2.00659  | 2737188   | 1       | 1    | <a href="#">31</a> |
| 209 | 543.40 | 366.10158 | 368.10735 | 132.04326 | 2.00578  | 128463    | 1       | 1    | <a href="#">69</a> |
| 210 | 547.71 | 502.13779 | 504.14503 | 268.07947 | 2.00724  | 16053     | 1       | 1    | <a href="#">20</a> |
| 211 | 547.86 | 535.17745 | 537.18634 | 301.11913 | 2.00889  | 14325     | 1       | 1    | <a href="#">15</a> |
| 212 | 547.94 | 385.10861 | 387.11500 | 151.05029 | 2.00639  | 732813    | 1       | 1    | <a href="#">11</a> |

| #   | RT (s) | mz_light  | mz_heavy  | mz        | distance | int_light | nCharge | nTag | Possible hits      |
|-----|--------|-----------|-----------|-----------|----------|-----------|---------|------|--------------------|
| 213 | 552.27 | 587.12946 | 589.13574 | 353.07114 | 2.00628  | 156000    | 1       | 1    | <a href="#">4</a>  |
| 214 | 553.31 | 344.10654 | 346.11273 | 110.04822 | 2.00619  | 56450     | 1       | 1    | <a href="#">8</a>  |
| 215 | 554.14 | 558.19607 | 560.20463 | 324.13775 | 2.00856  | 10245     | 1       | 1    | <a href="#">5</a>  |
| 216 | 555.42 | 367.13277 | 369.13812 | 133.07445 | 2.00535  | 16944     | 1       | 1    | <a href="#">40</a> |
| 217 | 556.07 | 363.10205 | 365.10843 | 129.04373 | 2.00638  | 6634063   | 1       | 1    | <a href="#">28</a> |
| 218 | 558.30 | 395.12784 | 397.13457 | 161.06952 | 2.00672  | 7980000   | 1       | 1    | <a href="#">48</a> |
| 219 | 559.32 | 463.23679 | 465.24223 | 229.17847 | 2.00544  | 10650     | 1       | 1    | <a href="#">2</a>  |
| 220 | 560.51 | 513.18949 | 515.19453 | 279.13117 | 2.00504  | 11713     | 1       | 1    | <a href="#">15</a> |
| 221 | 561.38 | 362.11731 | 364.12320 | 128.05899 | 2.00589  | 138625    | 1       | 1    | <a href="#">16</a> |
| 222 | 563.01 | 732.33810 | 734.34289 | 498.27978 | 2.00480  | 17800     | 1       | 1    | <a href="#">33</a> |
| 223 | 564.36 | 549.19295 | 551.19793 | 315.13463 | 2.00498  | 11139     | 1       | 1    | <a href="#">13</a> |
| 224 | 565.43 | 309.12698 | 311.13281 | 75.06866  | 2.00583  | 35750     | 1       | 1    | <a href="#">13</a> |
| 225 | 574.29 | 321.09117 | 323.09805 | 87.03285  | 2.00688  | 24000     | 1       | 1    | <a href="#">18</a> |
| 226 | 579.10 | 438.16918 | 440.17402 | 204.11086 | 2.00484  | 8060      | 1       | 1    | <a href="#">11</a> |
| 227 | 579.77 | 363.10184 | 365.10809 | 129.04352 | 2.00625  | 4109891   | 1       | 1    | <a href="#">28</a> |
| 228 | 581.51 | 551.17596 | 553.18254 | 317.11764 | 2.00659  | 99375     | 1       | 1    | <a href="#">3</a>  |
| 229 | 584.85 | 476.18510 | 478.19128 | 242.12678 | 2.00618  | 141875    | 1       | 1    | <a href="#">6</a>  |
| 230 | 584.94 | 569.17431 | 571.17938 | 335.11599 | 2.00507  | 13688     | 1       | 1    | <a href="#">9</a>  |
| 231 | 585.03 | 578.21321 | 580.21622 | 344.15489 | 2.00300  | 11700     | 1       | 1    | <a href="#">1</a>  |
| 232 | 588.15 | 436.20103 | 438.20623 | 202.14271 | 2.00520  | 94138     | 1       | 1    | <a href="#">4</a>  |
| 233 | 592.53 | 453.16876 | 455.17427 | 219.11044 | 2.00551  | 11355     | 1       | 1    | <a href="#">18</a> |
| 234 | 594.09 | 691.16617 | 695.17843 | 224.05683 | 4.01226  | 12338     | 1       | 2    | <a href="#">2</a>  |
| 235 | 594.61 | 363.10185 | 365.10838 | 129.04353 | 2.00652  | 6160379   | 1       | 1    | <a href="#">28</a> |
| 236 | 595.81 | 481.08373 | 483.08967 | 247.02541 | 2.00594  | 11970     | 1       | 1    | <a href="#">3</a>  |

| #   | RT (s) | mz_light  | mz_heavy  | mz        | distance | int_light | nCharge | nTag | Possible hits      |
|-----|--------|-----------|-----------|-----------|----------|-----------|---------|------|--------------------|
| 237 | 596.07 | 478.20075 | 480.20758 | 244.14243 | 2.00682  | 25897     | 1       | 1    | <a href="#">6</a>  |
| 238 | 598.45 | 671.24212 | 673.24947 | 437.18380 | 2.00734  | 34500     | 1       | 1    | <a href="#">2</a>  |
| 239 | 599.55 | 376.17954 | 378.18633 | 142.12122 | 2.00679  | 29025     | 1       | 1    | <a href="#">2</a>  |
| 240 | 603.78 | 460.11871 | 462.12532 | 226.06039 | 2.00661  | 2648125   | 1       | 1    | <a href="#">26</a> |
| 241 | 606.93 | 540.13514 | 542.14105 | 306.07682 | 2.00591  | 16914     | 1       | 1    | <a href="#">4</a>  |
| 242 | 607.40 | 337.12161 | 339.12866 | 103.06329 | 2.00705  | 30138     | 1       | 1    | <a href="#">45</a> |
| 243 | 608.13 | 420.15869 | 422.16536 | 186.10037 | 2.00667  | 36350     | 1       | 1    | <a href="#">15</a> |
| 244 | 608.53 | 379.13319 | 381.13957 | 145.07487 | 2.00638  | 4882500   | 1       | 1    | <a href="#">54</a> |
| 245 | 613.48 | 366.10172 | 368.10709 | 132.04340 | 2.00537  | 36813     | 1       | 1    | <a href="#">69</a> |
| 246 | 614.16 | 438.16979 | 440.17505 | 204.11147 | 2.00526  | 32606     | 1       | 1    | <a href="#">11</a> |
| 247 | 614.43 | 346.08759 | 348.09384 | 224.05853 | 2.00625  | 12625     | 2       | 2    | <a href="#">3</a>  |
| 248 | 617.42 | 478.19988 | 480.20616 | 244.14156 | 2.00628  | 65075     | 1       | 1    | <a href="#">6</a>  |
| 249 | 618.81 | 334.12196 | 336.12847 | 100.06364 | 2.00651  | 39788     | 1       | 1    | <a href="#">3</a>  |
| 250 | 618.83 | 398.12742 | 400.13418 | 164.06910 | 2.00676  | 15704     | 1       | 1    | <a href="#">74</a> |
| 251 | 621.05 | 550.19827 | 552.20489 | 316.13995 | 2.00662  | 214214    | 1       | 1    | <a href="#">4</a>  |
| 252 | 625.50 | 321.12682 | 323.13226 | 87.06850  | 2.00544  | 61700     | 1       | 1    | <a href="#">29</a> |
| 253 | 625.72 | 571.20509 | 573.21510 | 337.14677 | 2.01001  | 25078     | 1       | 1    | <a href="#">7</a>  |
| 254 | 628.03 | 558.19572 | 560.20162 | 324.13740 | 2.00590  | 17055     | 1       | 1    | <a href="#">5</a>  |
| 255 | 628.59 | 399.12352 | 401.13031 | 165.06520 | 2.00679  | 28125     | 1       | 1    | <a href="#">36</a> |
| 256 | 629.05 | 355.09357 | 357.10015 | 242.07050 | 2.00658  | 848267    | 2       | 2    | <a href="#">11</a> |
| 257 | 630.08 | 628.22743 | 630.23068 | 394.16911 | 2.00324  | 14600     | 1       | 1    | <a href="#">4</a>  |
| 258 | 631.62 | 506.17530 | 508.18207 | 272.11698 | 2.00677  | 14688     | 1       | 1    | <a href="#">10</a> |
| 259 | 634.25 | 550.19819 | 552.20519 | 316.13987 | 2.00700  | 364500    | 1       | 1    | <a href="#">4</a>  |
| 260 | 634.62 | 540.13524 | 542.14216 | 306.07692 | 2.00692  | 52522     | 1       | 1    | <a href="#">4</a>  |

| #   | RT (s) | mz_light  | mz_heavy  | mz        | distance | int_light | nCharge | nTag | Possible hits      |
|-----|--------|-----------|-----------|-----------|----------|-----------|---------|------|--------------------|
| 261 | 637.92 | 409.14260 | 411.14805 | 175.08428 | 2.00545  | 14850     | 1       | 1    | <a href="#">41</a> |
| 262 | 638.36 | 820.31584 | 822.32288 | 586.25752 | 2.00704  | 12800     | 1       | 1    | <a href="#">8</a>  |
| 263 | 639.06 | 427.13570 | 429.14172 | 193.07738 | 2.00602  | 23281     | 1       | 1    | <a href="#">7</a>  |
| 264 | 639.25 | 376.13238 | 378.13899 | 142.07406 | 2.00661  | 50213     | 1       | 1    | <a href="#">13</a> |
| 265 | 643.67 | 355.09417 | 357.09975 | 242.07170 | 2.00558  | 153213    | 2       | 2    | <a href="#">7</a>  |
| 266 | 648.89 | 578.21120 | 580.21766 | 344.15288 | 2.00646  | 24962     | 1       | 1    | <a href="#">1</a>  |
| 267 | 650.67 | 370.09800 | 372.10423 | 136.03968 | 2.00623  | 7773750   | 1       | 1    | <a href="#">10</a> |
| 268 | 650.67 | 603.14825 | 605.15460 | 369.08993 | 2.00635  | 82197     | 1       | 1    | <a href="#">7</a>  |
| 269 | 651.38 | 428.13809 | 430.14467 | 194.07977 | 2.00658  | 6630      | 1       | 1    | <a href="#">33</a> |
| 270 | 656.17 | 805.32125 | 807.32686 | 571.26293 | 2.00561  | 16900     | 1       | 1    | <a href="#">4</a>  |
| 271 | 657.15 | 563.21558 | 565.22122 | 329.15726 | 2.00565  | 14823     | 1       | 1    | <a href="#">3</a>  |
| 272 | 659.53 | 349.12263 | 351.12898 | 115.06431 | 2.00635  | 11411250  | 1       | 1    | <a href="#">33</a> |
| 273 | 661.17 | 477.16393 | 479.16971 | 243.10561 | 2.00578  | 2880000   | 1       | 1    | <a href="#">1</a>  |
| 274 | 661.65 | 629.21084 | 633.22356 | 162.10150 | 4.01272  | 46294     | 1       | 2    | <a href="#">15</a> |
| 275 | 662.03 | 496.13527 | 498.14096 | 524.15389 | 2.00570  | 8080      | 2       | 2    | <a href="#">1</a>  |
| 276 | 666.62 | 515.13002 | 519.14308 | 48.02068  | 4.01305  | 33563     | 1       | 2    | <a href="#">18</a> |
| 277 | 668.38 | 513.11465 | 517.13032 | 46.00531  | 4.01567  | 12400     | 1       | 2    | <a href="#">20</a> |
| 278 | 671.02 | 362.10080 | 364.10711 | 256.08497 | 2.00631  | 7163      | 2       | 2    | <a href="#">3</a>  |
| 279 | 672.40 | 599.22560 | 601.23295 | 365.16728 | 2.00736  | 87600     | 1       | 1    | <a href="#">19</a> |
| 280 | 674.19 | 550.19817 | 552.20432 | 316.13985 | 2.00614  | 55000     | 1       | 1    | <a href="#">4</a>  |
| 281 | 676.19 | 649.25401 | 651.25491 | 415.19569 | 2.00090  | 11700     | 1       | 1    | <a href="#">5</a>  |
| 282 | 677.13 | 570.21298 | 572.22247 | 336.15466 | 2.00949  | 11800     | 1       | 1    | <a href="#">8</a>  |
| 283 | 678.30 | 515.13076 | 519.14331 | 48.02142  | 4.01255  | 36200     | 1       | 2    | <a href="#">18</a> |
| 284 | 678.75 | 678.25991 | 680.26688 | 444.20159 | 2.00697  | 43325     | 1       | 1    | <a href="#">1</a>  |

| #   | RT (s) | mz_light  | mz_heavy  | mz        | distance | int_light | nCharge | nTag | Possible hits      |
|-----|--------|-----------|-----------|-----------|----------|-----------|---------|------|--------------------|
| 285 | 680.35 | 420.15876 | 422.16564 | 186.10044 | 2.00688  | 63300     | 1       | 1    | <a href="#">15</a> |
| 286 | 680.64 | 380.16324 | 382.16945 | 146.10492 | 2.00621  | 23225     | 1       | 1    | <a href="#">23</a> |
| 287 | 681.13 | 447.10422 | 449.10983 | 426.09179 | 2.00562  | 97300     | 2       | 2    | <a href="#">9</a>  |
| 288 | 681.48 | 408.15890 | 410.16512 | 174.10058 | 2.00622  | 147438    | 1       | 1    | <a href="#">35</a> |
| 289 | 682.61 | 695.34016 | 697.34159 | 461.28184 | 2.00143  | 7380      | 1       | 1    | <a href="#">10</a> |
| 290 | 682.80 | 622.22753 | 624.23503 | 388.16921 | 2.00751  | 24450     | 1       | 1    | <a href="#">1</a>  |
| 291 | 685.20 | 335.14252 | 337.14806 | 101.08420 | 2.00554  | 79800     | 1       | 1    | <a href="#">20</a> |
| 292 | 685.64 | 376.13304 | 378.13938 | 142.07472 | 2.00634  | 181500    | 1       | 1    | <a href="#">13</a> |
| 293 | 687.98 | 805.32424 | 807.33089 | 571.26592 | 2.00665  | 115225    | 1       | 1    | <a href="#">3</a>  |
| 294 | 688.41 | 486.16893 | 488.17453 | 252.11061 | 2.00560  | 13500     | 1       | 1    | <a href="#">9</a>  |
| 295 | 691.52 | 351.13804 | 353.14453 | 117.07972 | 2.00649  | 4883750   | 1       | 1    | <a href="#">38</a> |
| 296 | 693.11 | 578.21074 | 580.21793 | 344.15242 | 2.00719  | 15550     | 1       | 1    | <a href="#">1</a>  |
| 297 | 694.42 | 792.31510 | 794.32160 | 558.25678 | 2.00650  | 38200     | 1       | 1    | <a href="#">12</a> |
| 298 | 696.70 | 337.12183 | 339.12738 | 103.06351 | 2.00555  | 71066     | 1       | 1    | <a href="#">45</a> |
| 299 | 697.36 | 706.27382 | 708.27929 | 472.21550 | 2.00547  | 31391     | 1       | 1    | <a href="#">2</a>  |
| 300 | 698.11 | 605.15542 | 607.16323 | 371.09710 | 2.00781  | 7215      | 1       | 1    | <a href="#">9</a>  |
| 301 | 698.99 | 601.14498 | 603.15104 | 367.08666 | 2.00605  | 16688     | 1       | 1    | <a href="#">8</a>  |
| 302 | 701.87 | 654.25767 | 656.26397 | 420.19935 | 2.00630  | 22788     | 1       | 1    | <a href="#">2</a>  |
| 303 | 701.98 | 383.11071 | 385.11669 | 149.05239 | 2.00598  | 3057500   | 1       | 1    | <a href="#">9</a>  |
| 304 | 703.45 | 578.22115 | 580.22578 | 344.16283 | 2.00463  | 11800     | 1       | 1    | <a href="#">9</a>  |
| 305 | 703.73 | 346.08617 | 348.09312 | 112.02785 | 2.00696  | 589969    | 1       | 1    | <a href="#">10</a> |
| 306 | 704.92 | 691.26804 | 693.27476 | 457.20972 | 2.00672  | 8290      | 1       | 1    | <a href="#">11</a> |
| 307 | 705.57 | 351.13814 | 353.14451 | 117.07982 | 2.00637  | 5506875   | 1       | 1    | <a href="#">38</a> |
| 308 | 709.16 | 657.24312 | 659.25336 | 423.18480 | 2.01024  | 9410      | 1       | 1    | <a href="#">6</a>  |



| #   | RT (s) | mz_light  | mz_heavy  | mz        | distance | int_light | nCharge | nTag | Possible hits      |
|-----|--------|-----------|-----------|-----------|----------|-----------|---------|------|--------------------|
| 309 | 711.08 | 447.10361 | 449.11050 | 213.04529 | 2.00689  | 39900     | 1       | 1    | <a href="#">4</a>  |
| 310 | 713.17 | 599.22892 | 601.23610 | 365.17060 | 2.00718  | 19250     | 1       | 1    | <a href="#">19</a> |
| 311 | 713.83 | 321.09108 | 323.09733 | 87.03276  | 2.00625  | 99513     | 1       | 1    | <a href="#">18</a> |
| 312 | 721.17 | 614.23327 | 616.23907 | 380.17495 | 2.00580  | 9450      | 1       | 1    | <a href="#">9</a>  |
| 313 | 722.45 | 660.14851 | 662.15682 | 426.09019 | 2.00831  | 6610      | 1       | 1    | <a href="#">8</a>  |
| 314 | 724.12 | 335.14244 | 337.14875 | 101.08412 | 2.00632  | 49275     | 1       | 1    | <a href="#">20</a> |
| 315 | 726.66 | 367.07878 | 369.08469 | 133.02046 | 2.00591  | 185845    | 1       | 1    | <a href="#">4</a>  |
| 316 | 727.18 | 447.10405 | 449.11097 | 426.09146 | 2.00692  | 877000    | 2       | 2    | <a href="#">9</a>  |
| 317 | 727.46 | 783.17843 | 785.18340 | 549.12011 | 2.00498  | 6100      | 1       | 1    | <a href="#">2</a>  |
| 318 | 727.51 | 578.21502 | 580.21962 | 344.15670 | 2.00460  | 13280     | 1       | 1    | <a href="#">2</a>  |
| 319 | 728.14 | 377.10763 | 379.11261 | 286.09863 | 2.00498  | 6090      | 2       | 2    | <a href="#">12</a> |
| 320 | 730.10 | 457.16462 | 459.17205 | 223.10630 | 2.00743  | 30800     | 1       | 1    | <a href="#">20</a> |
| 321 | 730.32 | 641.25014 | 643.25686 | 407.19182 | 2.00671  | 46400     | 1       | 1    | <a href="#">4</a>  |
| 322 | 734.50 | 409.14398 | 411.15035 | 175.08566 | 2.00638  | 834750    | 1       | 1    | <a href="#">41</a> |
| 323 | 734.70 | 527.19868 | 529.20534 | 293.14036 | 2.00666  | 91413     | 1       | 1    | <a href="#">10</a> |
| 324 | 736.07 | 508.18198 | 510.18851 | 274.12366 | 2.00652  | 139066    | 1       | 1    | <a href="#">1</a>  |
| 325 | 736.41 | 335.14219 | 337.14889 | 101.08387 | 2.00669  | 50306     | 1       | 1    | <a href="#">20</a> |
| 326 | 736.76 | 585.21978 | 587.22641 | 351.16146 | 2.00663  | 507248    | 1       | 1    | <a href="#">3</a>  |
| 327 | 737.72 | 422.17337 | 424.18035 | 188.11505 | 2.00698  | 27056     | 1       | 1    | <a href="#">23</a> |
| 328 | 738.87 | 641.25814 | 643.26461 | 407.19982 | 2.00647  | 11100     | 1       | 1    | <a href="#">1</a>  |
| 329 | 739.11 | 469.15806 | 471.16534 | 470.19948 | 2.00728  | 9060      | 2       | 2    | <a href="#">5</a>  |
| 330 | 739.75 | 367.07858 | 369.08466 | 133.02026 | 2.00608  | 194884    | 1       | 1    | <a href="#">4</a>  |
| 331 | 740.65 | 479.17446 | 481.18111 | 245.11614 | 2.00665  | 9580      | 1       | 1    | <a href="#">7</a>  |
| 332 | 740.86 | 395.12823 | 397.13450 | 161.06991 | 2.00627  | 423375    | 1       | 1    | <a href="#">48</a> |

| #   | RT (s) | mz_light  | mz_heavy  | mz        | distance | int_light | nCharge | nTag | Possible hits      |
|-----|--------|-----------|-----------|-----------|----------|-----------|---------|------|--------------------|
| 333 | 741.29 | 447.10423 | 449.11084 | 426.09182 | 2.00661  | 337000    | 2       | 2    | <a href="#">9</a>  |
| 334 | 742.78 | 676.27248 | 678.27837 | 442.21416 | 2.00590  | 96675     | 1       | 1    | <a href="#">3</a>  |
| 335 | 742.80 | 448.10391 | 450.11023 | 428.09119 | 2.00631  | 76550     | 2       | 2    | <a href="#">2</a>  |
| 336 | 747.39 | 438.14918 | 440.15526 | 204.09086 | 2.00608  | 369203    | 1       | 1    | <a href="#">11</a> |
| 337 | 747.69 | 415.11075 | 417.11678 | 362.10486 | 2.00603  | 9695      | 2       | 2    | <a href="#">3</a>  |
| 338 | 747.78 | 396.13705 | 398.14364 | 324.15746 | 2.00659  | 3176922   | 2       | 2    | <a href="#">9</a>  |
| 339 | 748.20 | 397.13817 | 399.14448 | 326.15970 | 2.00630  | 713000    | 2       | 2    | <a href="#">2</a>  |
| 340 | 748.48 | 629.21024 | 633.22259 | 162.10090 | 4.01235  | 28744     | 1       | 2    | <a href="#">15</a> |
| 341 | 750.37 | 614.23032 | 616.23736 | 380.17200 | 2.00704  | 29297     | 1       | 1    | <a href="#">12</a> |
| 342 | 750.43 | 376.13226 | 378.13863 | 142.07394 | 2.00637  | 26238     | 1       | 1    | <a href="#">13</a> |
| 343 | 754.58 | 508.18119 | 510.18854 | 274.12287 | 2.00735  | 16000     | 1       | 1    | <a href="#">2</a>  |
| 344 | 755.02 | 812.33035 | 814.33889 | 578.27203 | 2.00854  | 8675      | 1       | 1    | <a href="#">1</a>  |
| 345 | 755.28 | 400.08638 | 402.09188 | 166.02806 | 2.00550  | 44934     | 1       | 1    | <a href="#">18</a> |
| 346 | 756.50 | 362.10149 | 364.10718 | 256.08635 | 2.00569  | 7800      | 2       | 2    | <a href="#">11</a> |
| 347 | 757.00 | 547.14276 | 549.14991 | 313.08444 | 2.00715  | 11715     | 1       | 1    | <a href="#">11</a> |
| 348 | 762.09 | 335.14241 | 337.14891 | 101.08409 | 2.00651  | 70341     | 1       | 1    | <a href="#">20</a> |
| 349 | 762.22 | 624.25196 | 626.25838 | 390.19364 | 2.00643  | 12300     | 1       | 1    | <a href="#">4</a>  |
| 350 | 763.81 | 456.15706 | 458.16104 | 222.09874 | 2.00399  | 12300     | 1       | 1    | <a href="#">23</a> |
| 351 | 764.25 | 464.17393 | 466.17955 | 230.11561 | 2.00562  | 12400     | 1       | 1    | <a href="#">9</a>  |
| 352 | 765.75 | 381.14841 | 383.15460 | 147.09009 | 2.00618  | 207281    | 1       | 1    | <a href="#">39</a> |
| 353 | 766.89 | 319.11190 | 321.11744 | 85.05358  | 2.00553  | 112100    | 1       | 1    | <a href="#">16</a> |
| 354 | 768.19 | 477.18137 | 479.18770 | 243.12305 | 2.00634  | 54691     | 1       | 1    | <a href="#">8</a>  |
| 355 | 768.40 | 526.16437 | 528.17133 | 292.10605 | 2.00695  | 20563     | 1       | 1    | <a href="#">14</a> |
| 356 | 772.95 | 452.18433 | 454.19186 | 218.12601 | 2.00752  | 12081     | 1       | 1    | <a href="#">6</a>  |

| #   | RT (s) | mz_light  | mz_heavy  | mz        | distance | int_light | nCharge | nTag | Possible hits      |
|-----|--------|-----------|-----------|-----------|----------|-----------|---------|------|--------------------|
| 357 | 776.08 | 527.19909 | 529.20616 | 293.14077 | 2.00707  | 13200     | 1       | 1    | <a href="#">5</a>  |
| 358 | 776.15 | 454.19720 | 456.20543 | 220.13888 | 2.00823  | 10549     | 1       | 1    | <a href="#">1</a>  |
| 359 | 778.61 | 409.14393 | 411.15026 | 175.08561 | 2.00633  | 5070000   | 1       | 1    | <a href="#">41</a> |
| 360 | 781.51 | 860.38274 | 862.39057 | 626.32442 | 2.00783  | 6760      | 1       | 1    | <a href="#">7</a>  |
| 361 | 781.90 | 335.14242 | 337.14930 | 101.08410 | 2.00688  | 99600     | 1       | 1    | <a href="#">20</a> |
| 362 | 782.16 | 477.18115 | 479.18681 | 243.12283 | 2.00566  | 11300     | 1       | 1    | <a href="#">8</a>  |
| 363 | 784.30 | 469.18384 | 471.18967 | 470.25104 | 2.00582  | 5370      | 2       | 2    | <a href="#">8</a>  |
| 364 | 784.41 | 321.11600 | 323.12256 | 174.11536 | 2.00656  | 726929    | 2       | 2    | <a href="#">5</a>  |
| 365 | 784.70 | 426.12069 | 428.12700 | 192.06237 | 2.00631  | 30900     | 1       | 1    | <a href="#">36</a> |
| 366 | 785.16 | 393.13701 | 395.14349 | 318.15739 | 2.00648  | 287482    | 2       | 2    | <a href="#">3</a>  |
| 367 | 788.47 | 452.18432 | 454.19119 | 218.12600 | 2.00687  | 31444     | 1       | 1    | <a href="#">6</a>  |
| 368 | 790.21 | 458.07414 | 460.07965 | 224.01582 | 2.00552  | 8630      | 1       | 1    | <a href="#">3</a>  |
| 369 | 792.25 | 680.06674 | 682.07652 | 446.00842 | 2.00978  | 23000     | 1       | 1    | <a href="#">3</a>  |
| 370 | 792.72 | 448.19043 | 450.19675 | 214.13211 | 2.00632  | 14950     | 1       | 1    | <a href="#">7</a>  |
| 371 | 793.25 | 351.10226 | 353.11063 | 117.04394 | 2.00837  | 17700     | 1       | 1    | <a href="#">1</a>  |
| 372 | 795.39 | 392.12912 | 394.13686 | 316.14159 | 2.00774  | 39000     | 2       | 2    | <a href="#">3</a>  |
| 373 | 796.29 | 592.22619 | 594.23353 | 358.16787 | 2.00734  | 17900     | 1       | 1    | <a href="#">1</a>  |
| 374 | 797.27 | 383.12959 | 385.13434 | 149.07127 | 2.00475  | 26300     | 1       | 1    | <a href="#">7</a>  |
| 375 | 798.45 | 458.17665 | 460.18294 | 224.11833 | 2.00630  | 23025     | 1       | 1    | <a href="#">10</a> |
| 376 | 799.33 | 335.14272 | 337.14927 | 101.08440 | 2.00655  | 11100     | 1       | 1    | <a href="#">20</a> |
| 377 | 802.46 | 360.10231 | 362.11009 | 126.04399 | 2.00778  | 1398938   | 1       | 1    | <a href="#">14</a> |
| 378 | 802.61 | 311.08412 | 313.09081 | 154.05160 | 2.00669  | 625969    | 2       | 2    | <a href="#">2</a>  |
| 379 | 805.99 | 371.63317 | 373.64010 | 275.14970 | 2.00693  | 24234     | 2       | 2    | <a href="#">13</a> |
| 380 | 807.82 | 399.13874 | 401.14507 | 165.08042 | 2.00633  | 6773984   | 1       | 1    | <a href="#">48</a> |

| #   | RT (s) | mz_light  | mz_heavy  | mz        | distance | int_light | nCharge | nTag | Possible hits      |
|-----|--------|-----------|-----------|-----------|----------|-----------|---------|------|--------------------|
| 381 | 810.68 | 592.22670 | 594.23280 | 358.16838 | 2.00611  | 18078     | 1       | 1    | <a href="#">2</a>  |
| 382 | 819.61 | 453.13465 | 455.13834 | 219.07633 | 2.00369  | 13650     | 1       | 1    | <a href="#">41</a> |
| 383 | 821.19 | 365.15396 | 367.16031 | 131.09564 | 2.00635  | 7231250   | 1       | 1    | <a href="#">36</a> |
| 384 | 827.89 | 815.30511 | 817.31591 | 581.24679 | 2.01080  | 14550     | 1       | 1    | <a href="#">19</a> |
| 385 | 828.22 | 731.28506 | 733.29231 | 497.22674 | 2.00726  | 14700     | 1       | 1    | <a href="#">1</a>  |
| 386 | 828.28 | 727.25793 | 731.27375 | 260.14859 | 4.01582  | 12700     | 1       | 2    | <a href="#">1</a>  |
| 387 | 829.56 | 729.27325 | 733.28755 | 262.16391 | 4.01430  | 16200     | 1       | 2    | <a href="#">2</a>  |
| 388 | 829.88 | 377.11666 | 379.12301 | 143.05834 | 2.00635  | 101000    | 1       | 1    | <a href="#">25</a> |
| 389 | 837.18 | 365.15381 | 367.16020 | 131.09549 | 2.00640  | 11103628  | 1       | 1    | <a href="#">36</a> |
| 390 | 843.36 | 392.14721 | 394.15303 | 316.17778 | 2.00582  | 12500     | 2       | 2    | <a href="#">3</a>  |
| 391 | 843.55 | 423.15840 | 425.16419 | 189.10008 | 2.00580  | 15175     | 1       | 1    | <a href="#">28</a> |
| 392 | 846.22 | 381.09418 | 383.10011 | 147.03586 | 2.00593  | 173772    | 1       | 1    | <a href="#">4</a>  |
| 393 | 849.58 | 681.31077 | 683.31661 | 447.25245 | 2.00583  | 13700     | 1       | 1    | <a href="#">7</a>  |
| 394 | 861.13 | 307.11155 | 309.11857 | 73.05323  | 2.00702  | 486000    | 1       | 1    | <a href="#">18</a> |
| 395 | 862.24 | 377.10525 | 379.11226 | 286.09386 | 2.00701  | 34981     | 2       | 2    | <a href="#">9</a>  |
| 396 | 862.62 | 397.12573 | 399.13122 | 163.06741 | 2.00550  | 15900     | 1       | 1    | <a href="#">5</a>  |
| 397 | 862.65 | 403.14363 | 405.15039 | 338.17063 | 2.00676  | 45588     | 2       | 2    | <a href="#">7</a>  |
| 398 | 862.94 | 612.26765 | 616.28052 | 145.15831 | 4.01287  | 55600     | 1       | 2    | <a href="#">3</a>  |
| 399 | 864.42 | 539.19087 | 541.19735 | 305.13255 | 2.00648  | 28775     | 1       | 1    | <a href="#">7</a>  |
| 400 | 866.68 | 335.10656 | 337.11286 | 101.04824 | 2.00630  | 172125    | 1       | 1    | <a href="#">29</a> |
| 401 | 867.32 | 597.11651 | 599.12135 | 363.05819 | 2.00484  | 37600     | 1       | 1    | <a href="#">24</a> |
| 402 | 867.40 | 626.28276 | 630.29547 | 159.17342 | 4.01272  | 6790      | 1       | 2    | <a href="#">2</a>  |
| 403 | 867.75 | 322.07429 | 324.08036 | 88.01597  | 2.00607  | 19650     | 1       | 1    | <a href="#">30</a> |
| 404 | 870.47 | 442.16381 | 444.17074 | 208.10549 | 2.00692  | 19975     | 1       | 1    | <a href="#">3</a>  |

| #   | RT (s) | mz_light  | mz_heavy  | mz        | distance | int_light | nCharge | nTag | Possible hits      |
|-----|--------|-----------|-----------|-----------|----------|-----------|---------|------|--------------------|
| 405 | 871.61 | 300.08643 | 302.09315 | 132.05623 | 2.00671  | 9500      | 2       | 2    | <a href="#">8</a>  |
| 406 | 872.61 | 309.58359 | 311.58829 | 151.05055 | 2.00469  | 13000     | 2       | 2    | <a href="#">11</a> |
| 407 | 873.34 | 549.16267 | 551.16896 | 315.10435 | 2.00628  | 10920     | 1       | 1    | <a href="#">21</a> |
| 408 | 873.43 | 344.14207 | 346.14833 | 110.08375 | 2.00627  | 31025     | 1       | 1    | <a href="#">3</a>  |
| 409 | 875.13 | 404.19996 | 406.20562 | 170.14164 | 2.00566  | 38622     | 1       | 1    | <a href="#">4</a>  |
| 410 | 876.59 | 320.65375 | 322.66024 | 173.19086 | 2.00649  | 39325     | 2       | 2    | <a href="#">3</a>  |
| 411 | 876.64 | 531.15325 | 533.16055 | 297.09493 | 2.00730  | 10400     | 1       | 1    | <a href="#">8</a>  |
| 412 | 876.80 | 373.62652 | 375.63122 | 279.13640 | 2.00471  | 16400     | 2       | 2    | <a href="#">1</a>  |
| 413 | 881.41 | 531.16020 | 533.16827 | 297.10188 | 2.00807  | 146000    | 1       | 1    | <a href="#">3</a>  |
| 414 | 882.64 | 532.20464 | 534.21182 | 298.14632 | 2.00718  | 14425     | 1       | 1    | <a href="#">2</a>  |
| 415 | 883.24 | 555.15155 | 557.15731 | 321.09323 | 2.00576  | 231500    | 1       | 1    | <a href="#">1</a>  |
| 416 | 883.89 | 641.33796 | 643.34475 | 407.27964 | 2.00679  | 389486    | 1       | 1    | <a href="#">4</a>  |
| 417 | 886.90 | 311.14183 | 313.14841 | 77.08351  | 2.00658  | 32300     | 1       | 1    | <a href="#">6</a>  |
| 418 | 887.71 | 577.15819 | 579.16426 | 343.09987 | 2.00606  | 28050     | 1       | 1    | <a href="#">15</a> |
| 419 | 888.22 | 416.11709 | 418.12230 | 182.05877 | 2.00521  | 12350     | 1       | 1    | <a href="#">45</a> |
| 420 | 892.63 | 612.26689 | 616.27972 | 145.15755 | 4.01283  | 15275     | 1       | 2    | <a href="#">3</a>  |
| 421 | 892.89 | 629.21068 | 633.22377 | 162.10134 | 4.01309  | 43625     | 1       | 2    | <a href="#">15</a> |
| 422 | 893.52 | 547.15553 | 549.16331 | 313.09721 | 2.00778  | 113909    | 1       | 1    | <a href="#">1</a>  |
| 423 | 893.58 | 462.20597 | 464.21145 | 228.14765 | 2.00548  | 21413     | 1       | 1    | <a href="#">3</a>  |
| 424 | 894.27 | 575.15253 | 577.15904 | 341.09421 | 2.00651  | 157531    | 1       | 1    | <a href="#">17</a> |
| 425 | 898.52 | 307.09538 | 309.10136 | 146.07412 | 2.00598  | 37775     | 2       | 2    | <a href="#">10</a> |
| 426 | 898.76 | 296.09557 | 298.10130 | 62.03725  | 2.00573  | 36038     | 1       | 1    | <a href="#">19</a> |
| 427 | 901.44 | 355.07114 | 357.07674 | 242.02564 | 2.00560  | 25100     | 2       | 2    | <a href="#">1</a>  |
| 428 | 901.65 | 377.10569 | 379.11283 | 286.09474 | 2.00714  | 14888     | 2       | 2    | <a href="#">3</a>  |

| #   | RT (s) | mz_light  | mz_heavy  | mz        | distance | int_light | nCharge | nTag | Possible hits      |
|-----|--------|-----------|-----------|-----------|----------|-----------|---------|------|--------------------|
| 429 | 902.66 | 577.16032 | 579.16296 | 343.10200 | 2.00264  | 22900     | 1       | 1    | <a href="#">16</a> |
| 430 | 902.75 | 354.07128 | 356.07781 | 240.02593 | 2.00653  | 182000    | 2       | 2    | <a href="#">3</a>  |
| 431 | 903.66 | 547.15317 | 549.16149 | 313.09485 | 2.00832  | 25900     | 1       | 1    | <a href="#">7</a>  |
| 432 | 905.14 | 553.14761 | 555.15005 | 319.08929 | 2.00244  | 36900     | 1       | 1    | <a href="#">8</a>  |
| 433 | 905.49 | 387.10050 | 389.10642 | 153.04218 | 2.00592  | 48838     | 1       | 1    | <a href="#">20</a> |
| 434 | 905.67 | 630.22134 | 632.22736 | 396.16302 | 2.00602  | 7580      | 1       | 1    | <a href="#">16</a> |
| 435 | 905.90 | 408.19522 | 410.20151 | 174.13690 | 2.00629  | 32319     | 1       | 1    | <a href="#">9</a>  |
| 436 | 905.98 | 363.13816 | 365.14459 | 129.07984 | 2.00643  | 3792500   | 1       | 1    | <a href="#">30</a> |
| 437 | 909.12 | 385.12002 | 387.12659 | 151.06170 | 2.00657  | 239100    | 1       | 1    | <a href="#">1</a>  |
| 438 | 911.64 | 612.26781 | 616.28023 | 145.15847 | 4.01241  | 50188     | 1       | 2    | <a href="#">3</a>  |
| 439 | 911.76 | 549.16349 | 551.16956 | 315.10517 | 2.00607  | 36300     | 1       | 1    | <a href="#">25</a> |
| 440 | 913.07 | 375.60561 | 377.61117 | 283.09459 | 2.00556  | 145594    | 2       | 2    | <a href="#">5</a>  |
| 441 | 913.71 | 311.08429 | 313.09097 | 154.05195 | 2.00668  | 564250    | 2       | 2    | <a href="#">2</a>  |
| 442 | 914.91 | 368.11636 | 370.12331 | 268.11608 | 2.00695  | 29650     | 2       | 2    | <a href="#">11</a> |
| 443 | 915.53 | 419.10733 | 421.11317 | 185.04901 | 2.00583  | 19150     | 1       | 1    | <a href="#">1</a>  |
| 444 | 918.93 | 553.14887 | 555.15162 | 319.09055 | 2.00274  | 15400     | 1       | 1    | <a href="#">8</a>  |
| 445 | 920.46 | 547.15576 | 549.16231 | 313.09744 | 2.00655  | 51000     | 1       | 1    | <a href="#">1</a>  |
| 446 | 922.46 | 377.10491 | 379.11250 | 286.09318 | 2.00759  | 28931     | 2       | 2    | <a href="#">9</a>  |
| 447 | 922.66 | 581.14068 | 585.15624 | 114.03134 | 4.01556  | 6650      | 1       | 2    | <a href="#">28</a> |
| 448 | 927.44 | 502.09665 | 504.10388 | 268.03833 | 2.00723  | 19863     | 1       | 1    | <a href="#">8</a>  |
| 449 | 928.09 | 496.18981 | 498.19654 | 262.13149 | 2.00673  | 18156     | 1       | 1    | <a href="#">6</a>  |
| 450 | 929.06 | 393.14769 | 395.15427 | 159.08937 | 2.00658  | 33403     | 1       | 1    | <a href="#">42</a> |
| 451 | 931.87 | 335.62226 | 337.62879 | 203.12789 | 2.00653  | 24719     | 2       | 2    | <a href="#">11</a> |
| 452 | 931.97 | 431.12581 | 433.13110 | 197.06749 | 2.00529  | 20250     | 1       | 1    | <a href="#">39</a> |

| #   | RT (s) | mz_light  | mz_heavy  | mz        | distance | int_light | nCharge | nTag | Possible hits      |
|-----|--------|-----------|-----------|-----------|----------|-----------|---------|------|--------------------|
| 453 | 932.57 | 349.61986 | 351.62644 | 231.12307 | 2.00659  | 39338     | 2       | 2    | <a href="#">5</a>  |
| 454 | 938.40 | 411.10457 | 413.11191 | 177.04625 | 2.00734  | 8470      | 1       | 1    | <a href="#">16</a> |
| 455 | 938.70 | 330.12701 | 332.13301 | 96.06869  | 2.00601  | 38466     | 1       | 1    | <a href="#">7</a>  |
| 456 | 938.75 | 369.10803 | 371.11399 | 270.09942 | 2.00596  | 15325     | 2       | 2    | <a href="#">2</a>  |
| 457 | 939.31 | 531.15215 | 533.15871 | 297.09383 | 2.00656  | 28613     | 1       | 1    | <a href="#">5</a>  |
| 458 | 940.82 | 502.09687 | 504.10423 | 268.03855 | 2.00736  | 17363     | 1       | 1    | <a href="#">8</a>  |
| 459 | 946.26 | 588.11535 | 590.12096 | 354.05703 | 2.00561  | 22850     | 1       | 1    | <a href="#">4</a>  |
| 460 | 946.41 | 376.11681 | 378.12213 | 284.11699 | 2.00532  | 5010      | 2       | 2    | <a href="#">2</a>  |
| 461 | 948.03 | 612.26605 | 616.27923 | 145.15671 | 4.01318  | 11100     | 1       | 2    | <a href="#">3</a>  |
| 462 | 949.05 | 354.10245 | 356.10966 | 240.08827 | 2.00720  | 5845      | 2       | 2    | <a href="#">5</a>  |
| 463 | 949.68 | 396.19421 | 398.20137 | 162.13589 | 2.00716  | 14300     | 1       | 1    | <a href="#">5</a>  |
| 464 | 949.91 | 351.13795 | 353.14454 | 117.07963 | 2.00659  | 612125    | 1       | 1    | <a href="#">38</a> |
| 465 | 951.93 | 473.13769 | 475.14418 | 239.07937 | 2.00649  | 62000     | 1       | 1    | <a href="#">17</a> |
| 466 | 952.27 | 395.10982 | 397.11534 | 161.05150 | 2.00552  | 177273    | 1       | 1    | <a href="#">4</a>  |
| 467 | 952.50 | 373.62452 | 375.63130 | 279.13240 | 2.00677  | 17275     | 2       | 2    | <a href="#">15</a> |
| 468 | 952.81 | 531.15248 | 533.15894 | 297.09416 | 2.00647  | 19200     | 1       | 1    | <a href="#">5</a>  |
| 469 | 954.46 | 975.42724 | 977.43386 | 741.36892 | 2.00663  | 66403     | 1       | 1    | <a href="#">1</a>  |
| 470 | 954.70 | 410.21035 | 412.21610 | 176.15203 | 2.00575  | 16000     | 1       | 1    | <a href="#">3</a>  |
| 471 | 957.72 | 350.64614 | 352.65257 | 233.17564 | 2.00643  | 42431     | 2       | 2    | <a href="#">2</a>  |
| 472 | 961.60 | 336.09837 | 338.10343 | 204.08010 | 2.00506  | 12000     | 2       | 2    | <a href="#">2</a>  |
| 473 | 961.72 | 384.14912 | 386.15526 | 300.18161 | 2.00614  | 26781     | 2       | 2    | <a href="#">1</a>  |
| 474 | 962.70 | 547.15402 | 549.16222 | 313.09570 | 2.00820  | 16863     | 1       | 1    | <a href="#">5</a>  |
| 475 | 963.36 | 406.16400 | 408.17079 | 344.21136 | 2.00679  | 10100     | 2       | 2    | <a href="#">1</a>  |
| 476 | 964.43 | 652.27057 | 654.27866 | 418.21225 | 2.00809  | 85325     | 1       | 1    | <a href="#">6</a>  |

| #   | RT (s) | mz_light  | mz_heavy  | mz        | distance | int_light | nCharge | nTag | Possible hits      |
|-----|--------|-----------|-----------|-----------|----------|-----------|---------|------|--------------------|
| 477 | 965.82 | 549.16203 | 551.16848 | 315.10371 | 2.00645  | 12750     | 1       | 1    | <a href="#">22</a> |
| 478 | 965.91 | 638.28272 | 640.28315 | 404.22440 | 2.00042  | 14600     | 1       | 1    | <a href="#">3</a>  |
| 479 | 966.44 | 423.16065 | 425.16662 | 189.10233 | 2.00597  | 941125    | 1       | 1    | <a href="#">2</a>  |
| 480 | 966.80 | 468.21629 | 470.22236 | 234.15797 | 2.00607  | 17025     | 1       | 1    | <a href="#">3</a>  |
| 481 | 966.82 | 501.11493 | 505.12830 | 34.00559  | 4.01336  | 60559     | 1       | 2    | <a href="#">8</a>  |
| 482 | 966.88 | 368.09964 | 370.10638 | 268.08265 | 2.00673  | 61681     | 2       | 2    | <a href="#">19</a> |
| 483 | 967.62 | 288.57292 | 290.57910 | 109.02919 | 2.00618  | 8278      | 2       | 2    | <a href="#">1</a>  |
| 484 | 967.71 | 369.10361 | 371.11033 | 270.09058 | 2.00672  | 16900     | 2       | 2    | <a href="#">9</a>  |
| 485 | 967.73 | 658.32700 | 660.32767 | 424.26868 | 2.00067  | 8040      | 1       | 1    | <a href="#">13</a> |
| 486 | 967.86 | 413.15322 | 415.16196 | 179.09490 | 2.00874  | 26650     | 1       | 1    | <a href="#">27</a> |
| 487 | 969.36 | 405.13650 | 407.14416 | 342.15636 | 2.00766  | 6730      | 2       | 2    | <a href="#">10</a> |
| 488 | 970.53 | 439.13607 | 441.14411 | 205.07775 | 2.00804  | 19925     | 1       | 1    | <a href="#">9</a>  |
| 489 | 971.73 | 311.59287 | 313.59969 | 155.06910 | 2.00682  | 77994     | 2       | 2    | <a href="#">14</a> |
| 490 | 972.10 | 652.28883 | 654.29284 | 418.23051 | 2.00402  | 9550      | 1       | 1    | <a href="#">2</a>  |
| 491 | 972.44 | 680.28829 | 682.29486 | 446.22997 | 2.00657  | 50625     | 1       | 1    | <a href="#">6</a>  |
| 492 | 975.74 | 371.63248 | 373.63850 | 275.14832 | 2.00602  | 10238     | 2       | 2    | <a href="#">10</a> |
| 493 | 976.01 | 547.15392 | 549.16252 | 313.09560 | 2.00860  | 13400     | 1       | 1    | <a href="#">5</a>  |
| 494 | 976.26 | 654.31392 | 658.32739 | 187.20458 | 4.01347  | 15910     | 1       | 2    | <a href="#">3</a>  |
| 495 | 977.06 | 342.63030 | 344.63687 | 217.14397 | 2.00657  | 14375     | 2       | 2    | <a href="#">6</a>  |
| 496 | 978.92 | 656.31406 | 658.32610 | 422.25574 | 2.01205  | 11700     | 1       | 1    | <a href="#">5</a>  |
| 497 | 980.38 | 346.09891 | 348.10579 | 224.08118 | 2.00688  | 10500     | 2       | 2    | <a href="#">36</a> |
| 498 | 980.97 | 300.10391 | 302.11049 | 132.09119 | 2.00657  | 40300     | 2       | 2    | <a href="#">17</a> |
| 499 | 984.42 | 421.15291 | 423.16061 | 187.09459 | 2.00770  | 14750     | 1       | 1    | <a href="#">7</a>  |
| 500 | 986.49 | 659.25008 | 661.25609 | 425.19176 | 2.00602  | 25250     | 1       | 1    | <a href="#">11</a> |



| #   | RT (s)  | mz_light  | mz_heavy  | mz        | distance | int_light | nCharge | nTag | Possible hits      |
|-----|---------|-----------|-----------|-----------|----------|-----------|---------|------|--------------------|
| 501 | 987.45  | 494.68875 | 496.69480 | 521.26086 | 2.00605  | 6890      | 2       | 2    | <a href="#">8</a>  |
| 502 | 990.39  | 395.12300 | 397.13138 | 322.12937 | 2.00837  | 7260      | 2       | 2    | <a href="#">8</a>  |
| 503 | 993.03  | 553.14345 | 555.14980 | 319.08513 | 2.00635  | 12250     | 1       | 1    | <a href="#">4</a>  |
| 504 | 994.46  | 297.57796 | 299.58451 | 127.03929 | 2.00654  | 27500     | 2       | 2    | <a href="#">6</a>  |
| 505 | 995.99  | 322.11739 | 324.12401 | 176.11815 | 2.00661  | 10248     | 2       | 2    | <a href="#">1</a>  |
| 506 | 1001.48 | 488.17759 | 490.18306 | 254.11927 | 2.00548  | 33175     | 1       | 1    | <a href="#">5</a>  |
| 507 | 1004.47 | 445.15332 | 447.16018 | 211.09500 | 2.00686  | 19300     | 1       | 1    | <a href="#">29</a> |
| 508 | 1004.84 | 407.16383 | 409.17006 | 173.10551 | 2.00623  | 44875     | 1       | 1    | <a href="#">29</a> |
| 509 | 1005.29 | 379.16895 | 381.17392 | 145.11063 | 2.00498  | 26941     | 1       | 1    | <a href="#">19</a> |
| 510 | 1006.47 | 363.61797 | 365.62474 | 259.11930 | 2.00677  | 8575      | 2       | 2    | <a href="#">12</a> |
| 511 | 1006.92 | 372.09032 | 374.09661 | 138.03200 | 2.00629  | 106109    | 1       | 1    | <a href="#">19</a> |
| 512 | 1014.64 | 441.14752 | 443.15374 | 207.08920 | 2.00623  | 35781     | 1       | 1    | <a href="#">25</a> |
| 513 | 1016.48 | 427.13226 | 429.13809 | 193.07394 | 2.00583  | 18200     | 1       | 1    | <a href="#">24</a> |
| 514 | 1019.82 | 312.08485 | 314.09115 | 156.05306 | 2.00630  | 839000    | 2       | 2    | <a href="#">17</a> |
| 515 | 1020.29 | 311.08446 | 313.09110 | 154.05228 | 2.00663  | 6781875   | 2       | 2    | <a href="#">1</a>  |
| 516 | 1022.50 | 308.11324 | 310.11967 | 148.10984 | 2.00643  | 904500    | 2       | 2    | <a href="#">2</a>  |
| 517 | 1026.08 | 457.14136 | 459.14810 | 223.08304 | 2.00675  | 15000     | 1       | 1    | <a href="#">28</a> |
| 518 | 1028.54 | 407.16419 | 409.17041 | 173.10587 | 2.00622  | 146750    | 1       | 1    | <a href="#">29</a> |
| 519 | 1030.24 | 760.26788 | 762.27474 | 526.20956 | 2.00686  | 84600     | 1       | 1    | <a href="#">3</a>  |
| 520 | 1034.98 | 413.15418 | 415.16000 | 179.09586 | 2.00581  | 573781    | 1       | 1    | <a href="#">27</a> |
| 521 | 1037.61 | 347.11234 | 349.11957 | 226.10804 | 2.00724  | 13122     | 2       | 2    | <a href="#">12</a> |
| 522 | 1038.06 | 485.17523 | 487.18131 | 251.11691 | 2.00608  | 8820      | 1       | 1    | <a href="#">5</a>  |
| 523 | 1038.57 | 738.22036 | 740.22077 | 504.16204 | 2.00042  | 12800     | 1       | 1    | <a href="#">2</a>  |
| 524 | 1039.57 | 367.60760 | 369.61494 | 267.09855 | 2.00734  | 318000    | 2       | 2    | <a href="#">45</a> |

| #   | RT (s)  | mz_light  | mz_heavy  | mz        | distance | int_light | nCharge | nTag | Possible hits      |
|-----|---------|-----------|-----------|-----------|----------|-----------|---------|------|--------------------|
| 525 | 1041.76 | 320.63544 | 322.64184 | 173.15424 | 2.00640  | 22450     | 2       | 2    | <a href="#">5</a>  |
| 526 | 1042.57 | 356.09962 | 358.10434 | 244.08259 | 2.00472  | 7290      | 2       | 2    | <a href="#">13</a> |
| 527 | 1043.27 | 355.62002 | 357.62708 | 243.12339 | 2.00706  | 10045     | 2       | 2    | <a href="#">8</a>  |
| 528 | 1045.56 | 477.21655 | 479.22447 | 243.15823 | 2.00793  | 19638     | 1       | 1    | <a href="#">2</a>  |
| 529 | 1047.28 | 375.60520 | 377.61174 | 283.09376 | 2.00654  | 88753     | 2       | 2    | <a href="#">40</a> |
| 530 | 1048.45 | 409.12535 | 411.13071 | 175.06703 | 2.00536  | 65332     | 1       | 1    | <a href="#">6</a>  |
| 531 | 1048.79 | 366.10141 | 368.10676 | 132.04309 | 2.00535  | 34500     | 1       | 1    | <a href="#">69</a> |
| 532 | 1056.57 | 444.15898 | 446.16564 | 210.10066 | 2.00666  | 13613     | 1       | 1    | <a href="#">23</a> |
| 533 | 1058.57 | 355.63779 | 357.64365 | 243.15894 | 2.00585  | 23969     | 2       | 2    | <a href="#">2</a>  |
| 534 | 1059.90 | 424.22565 | 426.23126 | 190.16733 | 2.00561  | 10000     | 1       | 1    | <a href="#">1</a>  |
| 535 | 1060.28 | 652.29872 | 656.31119 | 185.18938 | 4.01247  | 50459     | 1       | 2    | <a href="#">1</a>  |
| 536 | 1061.25 | 728.24226 | 730.24889 | 494.18394 | 2.00663  | 198156    | 1       | 1    | <a href="#">3</a>  |
| 537 | 1061.46 | 347.14263 | 349.14677 | 113.08431 | 2.00415  | 7780      | 1       | 1    | <a href="#">16</a> |
| 538 | 1063.17 | 379.16995 | 381.17633 | 145.11163 | 2.00639  | 2143750   | 1       | 1    | <a href="#">19</a> |
| 539 | 1063.71 | 341.11110 | 343.11957 | 214.10556 | 2.00847  | 21950     | 2       | 2    | <a href="#">1</a>  |
| 540 | 1066.14 | 389.12813 | 391.13395 | 155.06981 | 2.00582  | 90838     | 1       | 1    | <a href="#">14</a> |
| 541 | 1067.29 | 312.59492 | 314.60143 | 157.07320 | 2.00651  | 563481    | 2       | 2    | <a href="#">28</a> |
| 542 | 1069.45 | 934.41386 | 936.42235 | 700.35554 | 2.00849  | 5980      | 1       | 1    | <a href="#">5</a>  |
| 543 | 1070.30 | 299.09585 | 301.10258 | 130.07506 | 2.00673  | 22216     | 2       | 2    | <a href="#">18</a> |
| 544 | 1070.56 | 339.09654 | 341.10372 | 210.07643 | 2.00718  | 11269     | 2       | 2    | <a href="#">16</a> |
| 545 | 1077.06 | 455.16362 | 457.16953 | 221.10530 | 2.00591  | 26306     | 1       | 1    | <a href="#">16</a> |
| 546 | 1077.31 | 347.08938 | 349.09607 | 226.06212 | 2.00670  | 667375    | 2       | 2    | <a href="#">11</a> |
| 547 | 1078.28 | 356.09410 | 358.10140 | 244.07156 | 2.00729  | 28069     | 2       | 2    | <a href="#">32</a> |
| 548 | 1083.48 | 348.11498 | 350.11959 | 228.11331 | 2.00461  | 7400      | 2       | 2    | <a href="#">2</a>  |

| #   | RT (s)  | mz_light  | mz_heavy  | mz        | distance | int_light | nCharge | nTag | Possible hits      |
|-----|---------|-----------|-----------|-----------|----------|-----------|---------|------|--------------------|
| 549 | 1086.58 | 382.10946 | 384.11536 | 296.10227 | 2.00590  | 7533      | 2       | 2    | <a href="#">18</a> |
| 550 | 1091.08 | 429.15197 | 431.15815 | 195.09365 | 2.00618  | 17263     | 1       | 1    | <a href="#">1</a>  |
| 551 | 1093.29 | 411.14110 | 413.14666 | 177.08278 | 2.00556  | 130438    | 1       | 1    | <a href="#">6</a>  |
| 552 | 1093.63 | 389.11939 | 391.12549 | 310.12215 | 2.00609  | 6790      | 2       | 2    | <a href="#">6</a>  |
| 553 | 1094.23 | 372.17318 | 374.18009 | 138.11486 | 2.00691  | 11744     | 1       | 1    | <a href="#">3</a>  |
| 554 | 1096.58 | 341.64071 | 343.64715 | 215.16477 | 2.00644  | 17750     | 2       | 2    | <a href="#">5</a>  |
| 555 | 1097.31 | 487.15238 | 489.15885 | 253.09406 | 2.00647  | 16150     | 1       | 1    | <a href="#">9</a>  |
| 556 | 1097.57 | 761.31529 | 763.32157 | 527.25697 | 2.00629  | 5790      | 1       | 1    | <a href="#">12</a> |
| 557 | 1098.63 | 759.30885 | 761.31309 | 525.25053 | 2.00424  | 21400     | 1       | 1    | <a href="#">7</a>  |
| 558 | 1098.67 | 541.14297 | 543.14710 | 307.08465 | 2.00413  | 9710      | 1       | 1    | <a href="#">14</a> |
| 559 | 1100.11 | 356.09358 | 358.10081 | 244.07053 | 2.00723  | 40294     | 2       | 2    | <a href="#">29</a> |
| 560 | 1100.38 | 298.08804 | 300.09521 | 128.05945 | 2.00717  | 538375    | 2       | 2    | <a href="#">16</a> |
| 561 | 1104.59 | 335.10835 | 337.11448 | 202.10007 | 2.00612  | 16400     | 2       | 2    | <a href="#">1</a>  |
| 562 | 1107.66 | 421.17993 | 423.18596 | 187.12161 | 2.00603  | 299000    | 1       | 1    | <a href="#">22</a> |
| 563 | 1109.55 | 466.17945 | 468.18461 | 232.12113 | 2.00516  | 11031     | 1       | 1    | <a href="#">6</a>  |
| 564 | 1110.73 | 356.09422 | 358.10090 | 244.07180 | 2.00668  | 248125    | 2       | 2    | <a href="#">32</a> |
| 565 | 1117.69 | 328.13365 | 330.14152 | 188.15066 | 2.00786  | 9650      | 2       | 2    | <a href="#">4</a>  |
| 566 | 1124.66 | 423.14240 | 425.14653 | 189.08408 | 2.00414  | 8380      | 1       | 1    | <a href="#">1</a>  |
| 567 | 1128.03 | 326.63526 | 328.64112 | 185.15387 | 2.00586  | 13700     | 2       | 2    | <a href="#">2</a>  |
| 568 | 1129.61 | 321.16280 | 323.16964 | 87.10448  | 2.00684  | 148638    | 1       | 1    | <a href="#">10</a> |
| 569 | 1130.88 | 348.11413 | 350.12264 | 228.11163 | 2.00850  | 32100     | 2       | 2    | <a href="#">8</a>  |
| 570 | 1134.33 | 328.11714 | 330.12356 | 188.11764 | 2.00643  | 57016     | 2       | 2    | <a href="#">24</a> |
| 571 | 1140.53 | 386.10673 | 388.11380 | 152.04841 | 2.00707  | 8720      | 1       | 1    | <a href="#">31</a> |
| 572 | 1143.63 | 528.16246 | 532.17549 | 61.05312  | 4.01303  | 52644     | 1       | 2    | <a href="#">15</a> |

| #   | RT (s)  | mz_light  | mz_heavy  | mz        | distance | int_light | nCharge | nTag | Possible hits      |
|-----|---------|-----------|-----------|-----------|----------|-----------|---------|------|--------------------|
| 573 | 1145.62 | 321.10926 | 323.11535 | 174.10188 | 2.00609  | 35200     | 2       | 2    | <a href="#">35</a> |
| 574 | 1146.24 | 532.24870 | 534.25537 | 298.19038 | 2.00667  | 15350     | 1       | 1    | <a href="#">18</a> |
| 575 | 1148.74 | 349.15752 | 351.16314 | 115.09920 | 2.00562  | 10925     | 1       | 1    | <a href="#">21</a> |
| 576 | 1150.70 | 336.11439 | 338.12125 | 204.11214 | 2.00686  | 7110      | 2       | 2    | <a href="#">11</a> |
| 577 | 1153.10 | 292.10594 | 294.11229 | 116.09524 | 2.00635  | 41381     | 2       | 2    | <a href="#">9</a>  |
| 578 | 1153.63 | 379.16944 | 381.17540 | 145.11112 | 2.00596  | 379156    | 1       | 1    | <a href="#">19</a> |
| 579 | 1156.45 | 487.09989 | 489.10508 | 253.04157 | 2.00519  | 20350     | 1       | 1    | <a href="#">3</a>  |
| 580 | 1161.51 | 368.10170 | 370.10507 | 268.08675 | 2.00337  | 83175     | 2       | 2    | <a href="#">9</a>  |
| 581 | 1161.60 | 353.09554 | 355.10164 | 119.03722 | 2.00610  | 35100     | 1       | 1    | <a href="#">7</a>  |
| 582 | 1176.41 | 335.64035 | 337.64751 | 203.16406 | 2.00716  | 56400     | 2       | 2    | <a href="#">4</a>  |
| 583 | 1176.71 | 338.08845 | 340.09375 | 104.03013 | 2.00530  | 9610      | 1       | 1    | <a href="#">3</a>  |
| 584 | 1183.58 | 693.16709 | 697.18175 | 226.05775 | 4.01466  | 12700     | 1       | 2    | <a href="#">18</a> |
| 585 | 1187.80 | 346.08548 | 348.09120 | 112.02716 | 2.00572  | 32000     | 1       | 1    | <a href="#">9</a>  |
| 586 | 1190.73 | 711.13194 | 715.14952 | 244.02260 | 4.01758  | 10500     | 1       | 2    | <a href="#">2</a>  |
| 587 | 1190.80 | 311.08533 | 313.09345 | 154.05402 | 2.00812  | 1102188   | 2       | 2    | <a href="#">1</a>  |
| 588 | 1196.40 | 427.16945 | 429.17523 | 193.11113 | 2.00578  | 371219    | 1       | 1    | <a href="#">13</a> |
| 589 | 1197.20 | 472.22522 | 474.23277 | 238.16690 | 2.00755  | 7365      | 1       | 1    | <a href="#">1</a>  |
| 590 | 1197.95 | 343.08621 | 345.09177 | 109.02789 | 2.00556  | 12800     | 1       | 1    | <a href="#">3</a>  |
| 591 | 1198.60 | 359.10529 | 361.11103 | 125.04697 | 2.00575  | 39700     | 1       | 1    | <a href="#">15</a> |
| 592 | 1199.57 | 335.16715 | 337.17351 | 202.21767 | 2.00635  | 20450     | 2       | 2    | <a href="#">1</a>  |
| 593 | 1202.35 | 327.09071 | 329.09775 | 186.06478 | 2.00705  | 36100     | 2       | 2    | <a href="#">16</a> |
| 594 | 1203.83 | 397.15846 | 399.16358 | 163.10014 | 2.00512  | 11875     | 1       | 1    | <a href="#">16</a> |
| 595 | 1204.07 | 355.06430 | 357.07099 | 242.01196 | 2.00668  | 12953     | 2       | 2    | <a href="#">7</a>  |
| 596 | 1215.62 | 403.14390 | 405.15022 | 169.08558 | 2.00633  | 11850     | 1       | 1    | <a href="#">11</a> |

| #   | RT (s)  | mz_light  | mz_heavy  | mz        | distance | int_light | nCharge | nTag | Possible hits      |
|-----|---------|-----------|-----------|-----------|----------|-----------|---------|------|--------------------|
| 597 | 1219.76 | 355.06379 | 357.07005 | 242.01094 | 2.00626  | 8680      | 2       | 2    | <a href="#">7</a>  |
| 598 | 1225.89 | 325.09802 | 327.10475 | 182.07941 | 2.00673  | 661500    | 2       | 2    | <a href="#">35</a> |
| 599 | 1226.60 | 324.59677 | 326.60342 | 181.07691 | 2.00665  | 5635547   | 2       | 2    | <a href="#">4</a>  |
| 600 | 1227.31 | 414.12389 | 416.13048 | 180.06557 | 2.00658  | 35853     | 1       | 1    | <a href="#">10</a> |
| 601 | 1229.02 | 373.08570 | 375.09071 | 139.02738 | 2.00501  | 15050     | 1       | 1    | <a href="#">9</a>  |
| 602 | 1229.78 | 386.10619 | 388.11146 | 152.04787 | 2.00527  | 26500     | 1       | 1    | <a href="#">31</a> |
| 603 | 1237.79 | 363.17355 | 365.17966 | 129.11523 | 2.00611  | 30328     | 1       | 1    | <a href="#">10</a> |
| 604 | 1238.67 | 335.17841 | 337.18567 | 101.12009 | 2.00726  | 444575    | 1       | 1    | <a href="#">1</a>  |
| 605 | 1239.81 | 515.21134 | 517.21741 | 562.30605 | 2.00607  | 9200      | 2       | 2    | <a href="#">1</a>  |
| 606 | 1240.64 | 800.38542 | 802.39352 | 566.32710 | 2.00810  | 15000     | 1       | 1    | <a href="#">4</a>  |
| 607 | 1243.70 | 378.08280 | 380.08899 | 144.02448 | 2.00619  | 27225     | 1       | 1    | <a href="#">1</a>  |
| 608 | 1249.23 | 363.17292 | 365.17969 | 129.11460 | 2.00677  | 13150     | 1       | 1    | <a href="#">10</a> |
| 609 | 1252.74 | 335.17933 | 337.18635 | 101.12101 | 2.00702  | 576656    | 1       | 1    | <a href="#">1</a>  |
| 610 | 1263.07 | 437.17342 | 439.18081 | 203.11510 | 2.00739  | 30275     | 1       | 1    | <a href="#">22</a> |
| 611 | 1263.47 | 335.17842 | 337.18496 | 101.12010 | 2.00653  | 57878     | 1       | 1    | <a href="#">1</a>  |
| 612 | 1269.01 | 373.12257 | 375.12872 | 278.12850 | 2.00615  | 17950     | 2       | 2    | <a href="#">17</a> |
| 613 | 1278.93 | 681.29384 | 683.29907 | 447.23552 | 2.00523  | 16313     | 1       | 1    | <a href="#">6</a>  |
| 614 | 1280.03 | 345.62470 | 347.63089 | 223.13277 | 2.00619  | 11600     | 2       | 2    | <a href="#">2</a>  |
| 615 | 1281.84 | 690.79093 | 692.79794 | 913.46522 | 2.00701  | 26420     | 2       | 2    | <a href="#">1</a>  |
| 616 | 1282.81 | 275.08522 | 277.09202 | 82.05380  | 2.00680  | 16538     | 2       | 2    | <a href="#">4</a>  |
| 617 | 1282.90 | 690.45901 | 692.46494 | 456.40069 | 2.00593  | 30138     | 1       | 1    | <a href="#">12</a> |
| 618 | 1284.23 | 598.10105 | 600.10475 | 364.04273 | 2.00370  | 11340     | 1       | 1    | <a href="#">6</a>  |
| 619 | 1286.04 | 331.56011 | 333.56734 | 195.00358 | 2.00723  | 10300     | 2       | 2    | <a href="#">3</a>  |
| 620 | 1289.10 | 327.10907 | 329.11622 | 186.10150 | 2.00715  | 19775     | 2       | 2    | <a href="#">15</a> |

| #   | RT (s)  | mz_light  | mz_heavy  | mz        | distance | int_light | nCharge | nTag | Possible hits      |
|-----|---------|-----------|-----------|-----------|----------|-----------|---------|------|--------------------|
| 621 | 1294.28 | 321.12757 | 323.13420 | 174.13850 | 2.00663  | 143875    | 2       | 2    | <a href="#">9</a>  |
| 622 | 1298.78 | 302.07811 | 304.08615 | 136.03958 | 2.00803  | 6970      | 2       | 2    | <a href="#">10</a> |
| 623 | 1302.79 | 356.59542 | 358.60206 | 245.07421 | 2.00664  | 159528    | 2       | 2    | <a href="#">6</a>  |
| 624 | 1303.75 | 357.59491 | 359.60199 | 247.07317 | 2.00708  | 17300     | 2       | 2    | <a href="#">1</a>  |
| 625 | 1306.20 | 435.19433 | 437.20016 | 201.13601 | 2.00583  | 23763     | 1       | 1    | <a href="#">12</a> |
| 626 | 1308.32 | 354.11613 | 356.12235 | 120.05781 | 2.00622  | 190583    | 1       | 1    | <a href="#">13</a> |
| 627 | 1310.36 | 331.60383 | 333.61060 | 195.09102 | 2.00677  | 50994     | 2       | 2    | <a href="#">30</a> |
| 628 | 1310.46 | 367.14712 | 369.15390 | 133.08880 | 2.00678  | 14675     | 1       | 1    | <a href="#">6</a>  |
| 629 | 1311.31 | 488.15178 | 490.15874 | 254.09346 | 2.00696  | 21775     | 1       | 1    | <a href="#">8</a>  |
| 630 | 1313.29 | 325.60921 | 327.61556 | 183.10179 | 2.00634  | 26088     | 2       | 2    | <a href="#">8</a>  |
| 631 | 1314.07 | 284.60082 | 286.60668 | 101.08500 | 2.00586  | 10300     | 2       | 2    | <a href="#">20</a> |
| 632 | 1315.72 | 973.28293 | 975.28353 | 739.22461 | 2.00060  | 10300     | 1       | 1    | <a href="#">1</a>  |
| 633 | 1320.01 | 354.11670 | 356.12358 | 120.05838 | 2.00689  | 821875    | 1       | 1    | <a href="#">13</a> |
| 634 | 1325.81 | 338.59329 | 340.60018 | 209.06993 | 2.00689  | 24400     | 2       | 2    | <a href="#">42</a> |
| 635 | 1331.07 | 345.60138 | 347.60789 | 223.08612 | 2.00652  | 34638     | 2       | 2    | <a href="#">30</a> |
| 636 | 1332.36 | 527.25500 | 529.26273 | 293.19668 | 2.00772  | 22566     | 1       | 1    | <a href="#">7</a>  |
| 637 | 1333.22 | 515.13009 | 519.14304 | 48.02075  | 4.01294  | 10443     | 1       | 2    | <a href="#">18</a> |
| 638 | 1335.09 | 573.24449 | 575.25077 | 339.18617 | 2.00628  | 10400     | 1       | 1    | <a href="#">1</a>  |
| 639 | 1336.96 | 349.19354 | 351.19983 | 115.13522 | 2.00630  | 22750     | 1       | 1    | <a href="#">1</a>  |
| 640 | 1337.59 | 630.93376 | 632.93945 | 793.75088 | 2.00569  | 9965      | 2       | 2    | <a href="#">1</a>  |
| 641 | 1343.16 | 631.09962 | 633.10616 | 794.08261 | 2.00654  | 30003     | 2       | 2    | <a href="#">1</a>  |
| 642 | 1346.90 | 353.07408 | 355.08062 | 238.03152 | 2.00655  | 12300     | 2       | 2    | <a href="#">11</a> |
| 643 | 1349.36 | 630.93330 | 632.93979 | 793.74996 | 2.00649  | 58481     | 2       | 2    | <a href="#">1</a>  |
| 644 | 1350.47 | 331.60387 | 333.61080 | 195.09110 | 2.00693  | 344250    | 2       | 2    | <a href="#">30</a> |

| #   | RT (s)  | mz_light  | mz_heavy  | mz         | distance | int_light | nCharge | nTag | Possible hits      |
|-----|---------|-----------|-----------|------------|----------|-----------|---------|------|--------------------|
| 645 | 1352.47 | 297.59040 | 299.59735 | 127.06417  | 2.00694  | 57313     | 2       | 2    | <a href="#">20</a> |
| 646 | 1353.41 | 577.15698 | 581.16941 | 110.04764  | 4.01243  | 21538     | 1       | 2    | <a href="#">8</a>  |
| 647 | 1357.84 | 886.24530 | 888.25468 | 1304.37397 | 2.00938  | 7980      | 2       | 2    | <a href="#">2</a>  |
| 648 | 1358.13 | 352.60937 | 354.61549 | 237.10210  | 2.00612  | 28288     | 2       | 2    | <a href="#">11</a> |
| 649 | 1359.12 | 994.27031 | 996.27870 | 760.21199  | 2.00839  | 11500     | 1       | 1    | <a href="#">1</a>  |
| 650 | 1361.39 | 588.26278 | 590.26994 | 354.20446  | 2.00716  | 14938     | 1       | 1    | <a href="#">10</a> |
| 651 | 1361.52 | 287.08075 | 289.08682 | 106.04486  | 2.00607  | 7935      | 2       | 2    | <a href="#">1</a>  |
| 652 | 1362.27 | 308.58151 | 310.58939 | 149.04638  | 2.00788  | 29494     | 2       | 2    | <a href="#">17</a> |
| 653 | 1363.36 | 313.59304 | 315.59988 | 159.06944  | 2.00684  | 37797     | 2       | 2    | <a href="#">10</a> |
| 654 | 1364.45 | 305.57144 | 307.57810 | 143.02623  | 2.00666  | 152469    | 2       | 2    | <a href="#">2</a>  |
| 655 | 1367.48 | 577.15696 | 581.17035 | 110.04762  | 4.01339  | 27553     | 1       | 2    | <a href="#">8</a>  |
| 656 | 1375.96 | 344.10595 | 346.11224 | 110.04763  | 2.00629  | 33750     | 1       | 1    | <a href="#">8</a>  |
| 657 | 1378.47 | 328.13459 | 330.14174 | 188.15255  | 2.00715  | 9450      | 2       | 2    | <a href="#">4</a>  |
| 658 | 1379.15 | 504.18334 | 506.18996 | 270.12502  | 2.00662  | 19950     | 1       | 1    | <a href="#">11</a> |
| 659 | 1385.41 | 302.07785 | 304.08488 | 136.03906  | 2.00703  | 36913     | 2       | 2    | <a href="#">10</a> |
| 660 | 1388.40 | 772.32794 | 774.33575 | 538.26962  | 2.00781  | 28100     | 1       | 1    | <a href="#">7</a>  |
| 661 | 1388.47 | 515.13085 | 519.14448 | 48.02151   | 4.01363  | 304875    | 1       | 2    | <a href="#">18</a> |
| 662 | 1394.29 | 847.32132 | 851.34155 | 380.21198  | 4.02023  | 2096563   | 1       | 2    | <a href="#">4</a>  |
| 663 | 1394.42 | 612.26697 | 616.28060 | 145.15763  | 4.01364  | 55681     | 1       | 2    | <a href="#">3</a>  |
| 664 | 1398.37 | 454.24100 | 456.24746 | 220.18268  | 2.00645  | 222864    | 1       | 1    | <a href="#">3</a>  |
| 665 | 1400.16 | 826.36916 | 828.37345 | 592.31084  | 2.00429  | 7090      | 1       | 1    | <a href="#">5</a>  |
| 666 | 1405.36 | 363.21032 | 365.21693 | 129.15200  | 2.00661  | 383521    | 1       | 1    | <a href="#">1</a>  |
| 667 | 1408.01 | 331.08998 | 333.09706 | 194.06333  | 2.00708  | 10671     | 2       | 2    | <a href="#">1</a>  |
| 668 | 1412.89 | 620.24786 | 622.25051 | 386.18954  | 2.00265  | 24200     | 1       | 1    | <a href="#">5</a>  |

| #   | RT (s)  | mz_light  | mz_heavy  | mz        | distance | int_light | nCharge | nTag | Possible hits      |
|-----|---------|-----------|-----------|-----------|----------|-----------|---------|------|--------------------|
| 669 | 1414.54 | 947.22806 | 949.23212 | 713.16974 | 2.00406  | 11600     | 1       | 1    | <a href="#">3</a>  |
| 670 | 1415.41 | 297.08133 | 299.08729 | 126.04601 | 2.00597  | 34594     | 2       | 2    | <a href="#">3</a>  |
| 671 | 1416.03 | 338.61192 | 340.61882 | 209.10720 | 2.00690  | 359375    | 2       | 2    | <a href="#">18</a> |
| 672 | 1418.70 | 760.13421 | 762.14043 | 526.07589 | 2.00622  | 23725     | 1       | 1    | <a href="#">2</a>  |
| 673 | 1418.87 | 760.33615 | 762.34165 | 526.27783 | 2.00550  | 14600     | 1       | 1    | <a href="#">17</a> |
| 674 | 1419.44 | 950.41676 | 952.42586 | 716.35844 | 2.00909  | 16750     | 1       | 1    | <a href="#">2</a>  |
| 675 | 1420.81 | 573.47092 | 575.47781 | 678.82520 | 2.00689  | 57300     | 2       | 2    | <a href="#">1</a>  |
| 676 | 1422.21 | 757.34630 | 759.35453 | 523.28798 | 2.00823  | 6500      | 1       | 1    | <a href="#">9</a>  |
| 677 | 1422.72 | 479.20212 | 481.20688 | 245.14380 | 2.00476  | 8210      | 1       | 1    | <a href="#">1</a>  |
| 678 | 1422.84 | 908.41991 | 910.42194 | 674.36159 | 2.00203  | 6650      | 1       | 1    | <a href="#">5</a>  |
| 679 | 1422.91 | 573.21914 | 575.22804 | 339.16082 | 2.00891  | 42200     | 1       | 1    | <a href="#">2</a>  |
| 680 | 1425.70 | 323.60645 | 325.61317 | 179.09626 | 2.00672  | 12753     | 2       | 2    | <a href="#">27</a> |
| 681 | 1427.03 | 327.12655 | 329.13383 | 186.13647 | 2.00728  | 28450     | 2       | 2    | <a href="#">4</a>  |
| 682 | 1427.52 | 331.08949 | 333.09666 | 194.06234 | 2.00718  | 19534     | 2       | 2    | <a href="#">5</a>  |
| 683 | 1436.73 | 426.17300 | 428.17975 | 192.11468 | 2.00674  | 83602     | 1       | 1    | <a href="#">10</a> |
| 684 | 1437.72 | 319.57332 | 321.57954 | 171.03000 | 2.00622  | 42131     | 2       | 2    | <a href="#">2</a>  |
| 685 | 1439.19 | 361.07257 | 363.07864 | 254.02849 | 2.00607  | 36500     | 2       | 2    | <a href="#">5</a>  |
| 686 | 1442.11 | 623.22074 | 625.22677 | 389.16242 | 2.00603  | 61775     | 1       | 1    | <a href="#">23</a> |
| 687 | 1443.07 | 293.59553 | 295.60257 | 119.07442 | 2.00704  | 20775     | 2       | 2    | <a href="#">11</a> |
| 688 | 1446.23 | 822.36222 | 824.36827 | 588.30390 | 2.00605  | 55663     | 1       | 1    | <a href="#">8</a>  |
| 689 | 1449.13 | 832.23448 | 834.23320 | 598.17616 | 1.99872  | 25500     | 1       | 1    | <a href="#">4</a>  |
| 690 | 1449.94 | 854.21634 | 856.21590 | 620.15802 | 1.99956  | 18700     | 1       | 1    | <a href="#">1</a>  |
| 691 | 1461.50 | 483.26699 | 485.27431 | 249.20867 | 2.00732  | 35800     | 1       | 1    | <a href="#">1</a>  |
| 692 | 1465.87 | 865.19813 | 867.20610 | 631.13981 | 2.00797  | 7260      | 1       | 1    | <a href="#">1</a>  |



| #   | RT (s)  | mz_light  | mz_heavy  | mz        | distance | int_light | nCharge | nTag | Possible hits       |
|-----|---------|-----------|-----------|-----------|----------|-----------|---------|------|---------------------|
| 693 | 1469.02 | 620.23595 | 622.24172 | 386.17763 | 2.00577  | 30000     | 1       | 1    | <a href="#">15</a>  |
| 694 | 1469.04 | 923.42970 | 925.43666 | 689.37138 | 2.00696  | 40225     | 1       | 1    | <a href="#">3</a>   |
| 695 | 1472.09 | 623.22101 | 625.22737 | 389.16269 | 2.00636  | 109919    | 1       | 1    | <a href="#">14</a>  |
| 696 | 1474.50 | 826.36430 | 828.37156 | 592.30598 | 2.00726  | 7655      | 1       | 1    | <a href="#">3</a>   |
| 697 | 1476.06 | 621.15781 | 625.17156 | 154.04847 | 4.01374  | 21375     | 1       | 2    | <a href="#">12</a>  |
| 698 | 1483.37 | 792.31717 | 794.31760 | 558.25885 | 2.00043  | 8260      | 1       | 1    | <a href="#">12</a>  |
| 699 | 1484.39 | 578.23513 | 580.24152 | 344.17681 | 2.00638  | 53263     | 1       | 1    | <a href="#">1</a>   |
| 700 | 1486.25 | 669.32514 | 673.33790 | 202.21580 | 4.01276  | 15800     | 1       | 2    | <a href="#">1</a>   |
| 701 | 1486.89 | 570.29100 | 572.29316 | 336.23268 | 2.00216  | 11450     | 1       | 1    | <a href="#">100</a> |
| 702 | 1492.33 | 485.21034 | 487.21635 | 251.15202 | 2.00602  | 47225     | 1       | 1    | <a href="#">5</a>   |
| 703 | 1493.26 | 685.32688 | 687.33352 | 451.26856 | 2.00664  | 11730     | 1       | 1    | <a href="#">24</a>  |
| 704 | 1497.86 | 456.21945 | 458.22670 | 222.16113 | 2.00725  | 52984     | 1       | 1    | <a href="#">2</a>   |
| 705 | 1500.28 | 403.06362 | 405.06748 | 169.00530 | 2.00387  | 41691     | 1       | 1    | <a href="#">9</a>   |
| 706 | 1506.00 | 468.21979 | 470.22597 | 234.16147 | 2.00618  | 18230     | 1       | 1    | <a href="#">4</a>   |
| 707 | 1506.67 | 584.30725 | 586.30957 | 350.24893 | 2.00232  | 9120      | 1       | 1    | <a href="#">59</a>  |
| 708 | 1506.92 | 759.35082 | 761.35516 | 525.29250 | 2.00434  | 15900     | 1       | 1    | <a href="#">9</a>   |
| 709 | 1511.93 | 757.34615 | 759.35216 | 523.28783 | 2.00601  | 36700     | 1       | 1    | <a href="#">9</a>   |
| 710 | 1513.80 | 735.34388 | 737.35017 | 501.28556 | 2.00629  | 94963     | 1       | 1    | <a href="#">28</a>  |
| 711 | 1516.31 | 556.27458 | 558.27698 | 322.21626 | 2.00240  | 9940      | 1       | 1    | <a href="#">53</a>  |
| 712 | 1520.00 | 865.19981 | 867.20924 | 631.14149 | 2.00943  | 14050     | 1       | 1    | <a href="#">1</a>   |
| 713 | 1521.27 | 759.35280 | 761.35771 | 525.29448 | 2.00491  | 24800     | 1       | 1    | <a href="#">8</a>   |
| 714 | 1523.31 | 711.34181 | 713.35179 | 477.28349 | 2.00998  | 7930      | 1       | 1    | <a href="#">25</a>  |
| 715 | 1525.89 | 598.32315 | 600.32440 | 364.26483 | 2.00125  | 9490      | 1       | 1    | <a href="#">37</a>  |
| 716 | 1527.21 | 348.11694 | 350.12275 | 228.11724 | 2.00582  | 27250     | 2       | 2    | <a href="#">2</a>   |

| #   | RT (s)  | mz_light  | mz_heavy  | mz        | distance | int_light | nCharge | nTag | Possible hits      |
|-----|---------|-----------|-----------|-----------|----------|-----------|---------|------|--------------------|
| 717 | 1529.00 | 482.23612 | 484.24262 | 248.17780 | 2.00650  | 239048    | 1       | 1    | <a href="#">1</a>  |
| 718 | 1531.21 | 584.18886 | 586.19478 | 350.13054 | 2.00592  | 65250     | 1       | 1    | <a href="#">15</a> |
| 719 | 1531.63 | 440.22542 | 442.23200 | 206.16710 | 2.00658  | 289097    | 1       | 1    | <a href="#">1</a>  |
| 720 | 1532.61 | 761.35818 | 763.36785 | 527.29986 | 2.00967  | 13400     | 1       | 1    | <a href="#">16</a> |
| 721 | 1543.21 | 519.28734 | 521.29393 | 285.22902 | 2.00659  | 23750     | 1       | 1    | <a href="#">6</a>  |
| 722 | 1549.90 | 533.33992 | 535.34661 | 299.28160 | 2.00669  | 57257     | 1       | 1    | <a href="#">14</a> |
| 723 | 1553.12 | 669.35654 | 671.36305 | 435.29822 | 2.00651  | 6390      | 1       | 1    | <a href="#">17</a> |
| 724 | 1566.31 | 535.35505 | 537.36188 | 301.29673 | 2.00683  | 21875     | 1       | 1    | <a href="#">8</a>  |
| 725 | 1568.14 | 547.35599 | 549.36172 | 313.29767 | 2.00573  | 14800     | 1       | 1    | <a href="#">10</a> |
| 726 | 1569.01 | 454.23984 | 456.24643 | 220.18152 | 2.00659  | 60752     | 1       | 1    | <a href="#">3</a>  |
| 727 | 1569.71 | 417.12120 | 419.12817 | 183.06288 | 2.00697  | 60613     | 1       | 1    | <a href="#">15</a> |
| 728 | 1569.99 | 666.36798 | 668.37369 | 432.30966 | 2.00571  | 13950     | 1       | 1    | <a href="#">4</a>  |
| 729 | 1574.10 | 489.31422 | 491.32056 | 255.25590 | 2.00634  | 104750    | 1       | 1    | <a href="#">2</a>  |
| 730 | 1580.99 | 515.32889 | 517.33456 | 281.27057 | 2.00567  | 7580      | 1       | 1    | <a href="#">4</a>  |
| 731 | 1582.57 | 455.13753 | 457.14468 | 221.07921 | 2.00715  | 512983    | 1       | 1    | <a href="#">4</a>  |
| 732 | 1602.43 | 687.34515 | 689.35050 | 453.28683 | 2.00535  | 6765      | 1       | 1    | <a href="#">22</a> |
| 733 | 1619.19 | 713.35902 | 715.36405 | 479.30070 | 2.00503  | 21000     | 1       | 1    | <a href="#">27</a> |
| 734 | 1620.14 | 517.34507 | 519.35134 | 283.28675 | 2.00627  | 73725     | 1       | 1    | <a href="#">10</a> |
| 735 | 1631.72 | 713.35865 | 715.36492 | 479.30033 | 2.00626  | 19620     | 1       | 1    | <a href="#">27</a> |
| 736 | 1634.05 | 575.35016 | 577.35687 | 341.29184 | 2.00671  | 32300     | 1       | 1    | <a href="#">16</a> |
| 737 | 1689.44 | 671.34698 | 673.35294 | 437.28866 | 2.00596  | 7760      | 1       | 1    | <a href="#">9</a>  |
| 738 | 1707.69 | 671.34857 | 673.35182 | 437.29025 | 2.00325  | 7600      | 1       | 1    | <a href="#">9</a>  |
| 739 | 1707.69 | 697.36235 | 699.37029 | 463.30403 | 2.00794  | 5620      | 1       | 1    | <a href="#">19</a> |

**Table S2.** List of the compounds presented in Figure 4 of these nine metabolic pathways.

| KEGG ID | Compound name           | KEGG ID | Compound name               |
|---------|-------------------------|---------|-----------------------------|
| C00010  | Coenzyme A              | C00011  | Carbon dioxide              |
| C00012  | Peptide                 | C00014  | Ammonia                     |
| C00015  | Uridine 5'-diphosphate  | C00019  | S-Adenosylmethionine        |
| C00020  | Adenosine monophosphate | C00022  | Pyruvic acid                |
| C00024  | Acetyl-CoA              | C00025  | L-Glutamic acid             |
| C00026  | Oxoglutaric acid        | C00029  | Uridine diphosphate glucose |
| C00033  | Acetic acid             | C00036  | Oxalacetic acid             |
| C00037  | Glycine                 | C00039  | DNA                         |
| C00041  | L-Alanine               | C00042  | Succinic acid               |
| C00046  | RNA                     | C00048  | Glyoxylic acid              |
| C00049  | L-Aspartic acid         | C00054  | Adenosine 3',5'-diphosphate |
| C00055  | Cytidine monophosphate  | C00058  | Formic acid                 |
| C00062  | L-Arginine              | C00063  | Cytidine triphosphate       |
| C00064  | L-Glutamine             | C00068  | Thiamine pyrophosphate      |
| C00075  | Uridine triphosphate    | C00077  | Ornithine                   |
| C00078  | L-Tryptophan            | C00079  | L-Phenylalanine             |
| C00082  | L-Tyrosine              | C00083  | Malonyl-CoA                 |
| C00086  | Urea                    | C00088  | Nitrite                     |
| C00094  | Sulfite                 | C00097  | L-Cysteine                  |
| C00099  | Beta-Alanine            | C00100  | Propionyl-CoA               |

| KEGG ID | Compound name                  | KEGG ID | Compound name              |
|---------|--------------------------------|---------|----------------------------|
| C00105  | Uridine 5'-monophosphate       | C00106  | Uracil                     |
| C00108  | 2-Aminobenzoic acid            | C00112  | CDP                        |
| C00119  | Phosphoribosyl pyrophosphate   | C00122  | Fumaric acid               |
| C00134  | Putrescine                     | C00135  | L-Histidine                |
| C00136  | Butanoyl-CoA                   | C00141  | Alpha-ketoisovaleric acid  |
| C00148  | L-Proline                      | C00152  | L-Asparagine               |
| C00155  | L-Homocysteine                 | C00164  | Acetoacetic acid           |
| C00169  | Carbamoylphosphate             | C00178  | Thymine                    |
| C00179  | Agmatine                       | C00183  | L-Valine                   |
| C00187  | Cholesterol                    | C00192  | Hydroxylamine              |
| C00213  | Sarcosine                      | C00214  | Thymidine                  |
| C00222  | Malonic semialdehyde           | C00227  | Acetylphosphate            |
| C00229  | Acyl-carrier protein           | C00232  | Succinic acid semialdehyde |
| C00239  | dCMP                           | C00241  | Amide                      |
| C00244  | Nitrate                        | C00245  | Taurine                    |
| C00246  | Butyric acid                   | C00295  | Orotic acid                |
| C00299  | Uridine                        | C00300  | Creatine                   |
| C00315  | Spermidine                     | C00327  | Citrulline                 |
| C00332  | Acetoacetyl-CoA                | C00334  | Gamma-Aminobutyric acid    |
| C00337  | 4,5-Dihydroorotic acid         | C00342  | Thioredoxin                |
| C00343  | Thioredoxin disulfide          | C00352  | Glucosamine 6-phosphate    |
| C00356  | 3-Hydroxy-3-methylglutaryl-CoA | C00363  | dTDP                       |
| C00364  | 5-Thymidylic acid              | C00365  | dUMP                       |

| KEGG ID | Compound name             | KEGG ID | Compound name             |
|---------|---------------------------|---------|---------------------------|
| C00380  | Cytosine                  | C00383  | Malonic acid              |
| C00386  | Carnosine                 | C00402  | D-Aspartic acid           |
| C00429  | Dihydrouracil             | C00431  | 5-Aminopentanoic acid     |
| C00433  | 2,5-Dioxopentanoate       | C00436  | N-Carbamoylputrescine     |
| C00437  | N-Acetylornithine         | C00438  | Ureidosuccinic acid       |
| C00458  | dCTP                      | C00459  | Thymidine 5'-triphosphate |
| C00460  | Deoxyuridine triphosphate | C00475  | Cytidine                  |
| C00488  | Formamide                 | C00497  | (R)-Malate                |
| C00506  | Cysteic acid              | C00519  | Hypotaurine               |
| C00522  | (R)-Pantoate              | C00526  | Deoxyuridine              |
| C00533  | Nitric oxide              | C00542  | Allocystathionine         |
| C00555  | 4-Aminobutyraldehyde      | C00581  | Guanidoacetic acid        |
| C00593  | Sulfoacetaldehyde         | C00606  | 3-Sulfinioalanine         |
| C00624  | N-Acetyl-L-alanine        | C00672  | Deoxyribose 1-phosphate   |
| C00695  | Cholic acid               | C00697  | Nitrogen                  |
| C00705  | dCDP                      | C00706  | Amine                     |
| C00726  | Nitrile                   | C00741  | Diacetyl                  |
| C00750  | Spermine                  | C00763  | D-Proline                 |
| C00791  | Creatinine                | C00804  | Propynoic acid            |
| C00810  | (R)-Acetoin               | C00813  | Barbiturate               |
| C00831  | Pantetheine               | C00864  | Pantothenic acid          |
| C00877  | Crotonoyl-CoA             | C00881  | Deoxycytidine             |
| C00882  | Dephospho-CoA             | C00884  | Homocarnosine             |

| KEGG ID | Compound name               | KEGG ID | Compound name                           |
|---------|-----------------------------|---------|-----------------------------------------|
| C00887  | Nitrous oxide               | C00894  | Acrylyl-CoA                             |
| C00900  | 2-Acetolactate              | C00906  | Dihydrothymine                          |
| C00940  | 2-Keto-glutaramic acid      | C00966  | 2-Dehydropantoate                       |
| C00986  | 1,3-Diaminopropane          | C00989  | 4-Hydroxybutyric acid                   |
| C01010  | Urea-1-carboxylate          | C01013  | Hydroxypropionic acid                   |
| C01035  | 4-Guanidinobutanoic acid    | C01042  | N-Acetyl-L-aspartic acid                |
| C01043  | N-Carbamoylsarcosine        | C01053  | (R)-4-Dehydropantoate                   |
| C01073  | N-Acetyl-beta-alanine       | C01088  | (R)-3,3-Dimethylmalate                  |
| C01089  | (R)-3-Hydroxybutyric acid   | C01103  | Orotidylic acid                         |
| C01110  | 5-Amino-2-oxopentanoic acid | C01134  | Pantetheine 4'-phosphate                |
| C01137  | S-Adenosylmethioninamine    | C01144  | (S)-3-Hydroxybutanoyl-CoA               |
| C01157  | Hydroxyproline              | C01165  | L-Glutamic-gamma-semialdehyde           |
| C01168  | Pseudouridine 5'-phosphate  | C01250  | N-Acetyl-L-glutamate 5-semialdehyde     |
| C01262  | Anserine                    | C01301  | 3a,7a,12a-Trihydroxy-5b-cholestan-26-al |
| C01346  | dUDP                        | C01353  | Carbonic acid                           |
| C01358  | NH <sub>4</sub> OH          | C01368  | 3'-UMP                                  |
| C01384  | Maleic acid                 | C01412  | Butanal                                 |
| C01417  | Cyanate                     | C01563  | Carbamic acid                           |
| C01678  | Cysteamine                  | C01682  | Nopaline                                |
| C01769  | (S)-Acetoin                 | C01794  | Choloyl-CoA                             |
| C01837  | Nitroethane                 | C01877  | 4-Oxoproline                            |
| C01921  | Glycocholic acid            | C01959  | Taurocyamine                            |
| C02067  | Pseudouridine               | C02170  | Methylmalonic acid                      |

| KEGG ID | Compound name                    | KEGG ID | Compound name                       |
|---------|----------------------------------|---------|-------------------------------------|
| C02291  | L-Cystathionine                  | C02305  | Phosphocreatine                     |
| C02331  | Vinylacetyl-CoA                  | C02335  | Beta-Alanyl-CoA                     |
| C02354  | 2',3'-Cyclic CMP                 | C02355  | 2',3'-Cyclic UMP                    |
| C02362  | 2-Oxosuccinamate                 | C02376  | 5-Methylcytosine                    |
| C02411  | Glutaconyl-1-CoA                 | C02466  | Trimetaphosphate                    |
| C02527  | Butanoylphosphate                | C02528  | Chenodeoxycholic acid               |
| C02565  | N-Methylhydantoin                | C02630  | 2-Hydroxyglutarate                  |
| C02642  | Ureidopropionic acid             | C02647  | 4-Guanidinobutanal                  |
| C02714  | N-Acetylputrescine               | C02946  | 4-Acetamidobutanoic acid            |
| C03044  | (R,R)-Butane-2,3-diol            | C03046  | (S,S)-Butane-2,3-diol               |
| C03058  | 2-Hydroxyglutaryl-CoA            | C03078  | 4-Guanidinobutanamide               |
| C03090  | 5-Phosphoribosylamine            | C03149  | N-Phosphotaurocyamine               |
| C03166  | Phosphoguanidinoacetate          | C03287  | L-Glutamic acid 5-phosphate         |
| C03296  | N2-Succinyl-L-arginine           | C03406  | Argininosuccinic acid               |
| C03415  | N2-Succinyl-L-ornithine          | C03440  | cis-4-Hydroxy-D-proline             |
| C03492  | D-4'-Phosphopantothenate         | C03561  | 3-Hydroxybutyryl-CoA                |
| C03564  | 1-Pyrroline-2-carboxylic acid    | C03594  | 7a-Hydroxycholesterol               |
| C03618  | L-threo-3-Methylaspartate        | C03688  | Apo-[acyl-carrier-protein]          |
| C03771  | 5-Guanidino-2-oxopentanoate      | C03794  | Adenylsuccinic acid                 |
| C03912  | (S)-1-Pyrroline-5-carboxylate    | C03997  | 5-Hydroxymethyldeoxycytidylate      |
| C04039  | 2,3-Dihydroxy-3-methylbutanoate  | C04079  | D-Pantothenoyl-L-cysteine           |
| C04133  | N-Acetyl-L-glutamyl 5-phosphate  | C04137  | N2-(D-1-Carboxyethyl)-L-arginine    |
| C04281  | Pyrroline hydroxycarboxylic acid | C04282  | 1-Pyrroline-4-hydroxy-2-carboxylate |

| KEGG ID | Compound name                                          | KEGG ID | Compound name                                  |
|---------|--------------------------------------------------------|---------|------------------------------------------------|
| C04352  | 4-Phosphopantothenoylcysteine                          | C04546  | (R)-3-((R)-3-Hydroxybutanoyloxy)butanoate      |
| C04554  | 3alpha,7alpha-Dihydroxy-5beta-cholestanate             | C04722  | 3a,7a,12a-Trihydroxy-5b-cholestanic acid       |
| C05100  | Ureidoisobutyric acid                                  | C05122  | Taurocholic acid                               |
| C05123  | 2-Hydroxyethanesulfonate                               | C05125  | 2-(alpha-Hydroxyethyl)thiamine diphosphate     |
| C05145  | 3-Aminoisobutanoic acid                                | C05167  | alpha-Amino acid                               |
| C05281  | 5-Methylbarbiturate                                    | C05337  | Chenodeoxycholoyl-CoA                          |
| C05340  | beta-Alanyl-L-arginine                                 | C05341  | beta-Alanyl-L-lysine                           |
| C05444  | 3alpha,7alpha,26-Trihydroxy-5beta-cholestane           | C05445  | 3a,7a-Dihydroxy-5b-cholestan-26-al             |
| C05446  | 3alpha,7alpha,12alpha,26-Tetrahydroxy-5beta-cholestane | C05447  | 3a,7a-Dihydroxy-5b-cholest-24-enoyl-CoA        |
| C05448  | 3a,7a,12a-Trihydroxy-5b-cholestanoyl-CoA               | C05449  | 3a,7a-Dihydroxy-5b-24-oxocholestanoyl-CoA      |
| C05450  | 3a,7a,12a,24-Tetrahydroxy-5b-cholestanoyl-CoA          | C05451  | 7a-Hydroxy-5b-cholestan-3-one                  |
| C05452  | 3a,7a-Dihydroxy-5b-cholestanane                        | C05453  | 7a,12a-Dihydroxy-5b-cholestan-3-one            |
| C05454  | 5-b-Cholestane-3a,7a,12a-triol                         | C05455  | 7a-Hydroxy-cholestene-3-one                    |
| C05460  | 3a,7a,12a-Trihydroxy-5b-cholest-24-enoyl-CoA           | C05465  | Taurochenodesoxycholic acid                    |
| C05466  | Chenodeoxycholic acid glycine conjugate                | C05467  | 3a,7a,12a-Trihydroxy-5b-24-oxocholestanoyl-CoA |
| C05468  | 5b-Cyprinol sulfate                                    | C05665  | 3-Aminopropionaldehyde                         |
| C05668  | 3-Hydroxypropionyl-CoA                                 | C05822  | 3'-CMP                                         |
| C05844  | 5-L-Glutamyl-taurine                                   | C05931  | N-Succinyl-L-glutamate                         |
| C05932  | N2-Succinyl-L-glutamic acid 5-semialdehyde             | C05933  | N-(o)-Hydroxyarginine                          |
| C05936  | N4-Acetylaminobutanal                                  | C05938  | L-4-Hydroxyglutamate semialdehyde              |
| C05939  | Linatine                                               | C05941  | 2-Oxo-4-hydroxy-5-aminovalerate                |
| C05942  | Pyrrole-2-carboxylic                                   | C05944  | Pantothenol                                    |



| KEGG ID | Compound name                                                     | KEGG ID | Compound name                                                     |
|---------|-------------------------------------------------------------------|---------|-------------------------------------------------------------------|
| C05945  | L-Arginine phosphate                                              | C05946  | D-4-Hydroxy-2-oxoglutarate                                        |
| C05947  | L-erythro-4-Hydroxyglutamate                                      | C06059  | Cyclic amidines                                                   |
| C06060  | Amidines                                                          | C06142  | 1-Butanol                                                         |
| C06143  | Poly-beta-hydroxybutyrate                                         | C06144  | 3-Butynoate                                                       |
| C06145  | 3-Butyn-1-al                                                      | C06146  | 3-Butyn-1-ol                                                      |
| C06198  | P1,P4-Bis(5'-uridyl) tetraphosphate                               | C06341  | 7-a,27-dihydroxycholesterol                                       |
| C06735  | Aminoacetaldehyde                                                 | C11038  | 2'-Deoxy-5-hydroxymethylcytidine-5'-diphosphate                   |
| C11039  | 2'-Deoxy-5-hydroxymethylcytidine-5'-triphosphate                  | C13550  | 24-Hydroxycholesterol                                             |
| C14179  | Sulfoacetate                                                      | C15518  | (24S)-Cholest-5-ene-3beta,7alpha,24-triol                         |
| C15519  | 25-Hydroxycholesterol                                             | C15520  | 7-a,25-Dihydroxycholesterol                                       |
| C15607  | 3-Oxo-3-ureidopropanoate                                          | C15610  | Cholest-5-ene-3beta,26-diol                                       |
| C15613  | (25R)-3alpha,7alpha,12alpha-Trihydroxy-5beta-cholestan-26-oyl-CoA | C15699  | Gamma-glutamyl-L-putrescine                                       |
| C15700  | gamma-Glutamyl-gamma-aminobutyraldehyde                           | C15767  | 4-(Glutamylamino) butanoate                                       |
| C17331  | 7alpha,24-Dihydroxy-4-cholesten-3-one                             | C17332  | alpha,25-Dihydroxy-4-cholesten-3-one                              |
| C17333  | 3 beta-Hydroxy-5-cholestenoate                                    | C17335  | 3 beta,7 alpha-Dihydroxy-5-cholestenoate                          |
| C17336  | 7 alpha,26-Dihydroxy-4-cholesten-3-one                            | C17337  | 7 alpha-Hydroxy-3-oxo-4-cholestenoate                             |
| C17339  | 4-Cholesten-7alpha,12alpha-diol-3-one                             | C17343  | (25S)-3alpha,7alpha,12alpha-Trihydroxy-5beta-cholestan-26-oyl-CoA |
| C17345  | (25R)-3alpha,7alpha-Dihydroxy-5beta-cholestanoyl-CoA              | C17346  | (25S)-3alpha,7alpha-Dihydroxy-5beta-cholestanoyl-CoA              |
| C18091  | Ethylnitronate                                                    |         |                                                                   |
