# Supplementary material for: The Impact of GFP Reporter Gene Transduction and Expression on Metabolomics of Placental Mesenchymal Stem Cells Determined by UHPLC-Q/TOF-MS
Source: Stem Cells Int. 2017 Nov 5;2017:3167985. doi: 10.1155/2017/3167985 (PMC5694582; doi:10.1155/2017/3167985)
Supplement: Supplementary file 3 [file 3167985.f3.xlsx]

## Sheet: T-S1-A
Supplemental Table S1A. Identification of cellular metabolites based on the mass and retention time matches against the dansyl standard library.
#	Input mass	Input RT(min)	Calibrated RT (min)	HMDB.No.	Name	Accurate mass	mz_light	library RT	Mass error ( Da)	RT error (min)
1	375.08	3.08	1.8	HMDB00224	O-Phosphoethanolamine	141.019	375.077	2.02	0.0026	0.22
2	359.074	3.35	1.95	HMDB00251	Taurine	125.015	359.073	2.24	0.0005	0.29
3	388.108	3.48	2.03	HMDB00157	Hypoxanthine + H2O	136.038	388.11	2.12	0.0018	0.09
4	517.15	3.57	2.09	HMDB00133	Guanosine	283.092	517.15	2.22	0.0005	0.13
5	359.074	3.59	2.09	HMDB00251	Taurine	125.015	359.073	2.24	0.0005	0.15
6	517.151	3.78	2.21	HMDB00133	Guanosine	283.092	517.15	2.22	0.0006	0.01
7	517.15	3.99	2.33	HMDB00133	Guanosine	283.092	517.15	2.22	0.0002	0.11
8	408.171	4.03	2.35	HMDB00517	L-Arginine	174.112	408.17	2.44	0.0009	0.09
9	403.143	4.19	2.45	HMDB00001	1-Methylhistidine	169.085	403.143	2.17	0.0007	0.28
10	403.143	4.19	2.45	HMDB00479	3-methyl-histidine	169.085	403.143	2.01	0.0007	0.44
11	408.171	4.37	2.73	HMDB00517	L-Arginine	174.112	408.17	2.44	0.0005	0.29
12	366.113	4.45	2.87	HMDB00168	L-Asparagine	132.054	366.112	3	0.0007	0.13
13	380.128	4.91	3.63	HMDB00641	L-Glutamine	146.069	380.127	3.32	0.0004	0.31
14	380.128	4.91	3.63	HMDB03423	D-Glutamine	146.069	380.127	3.32	0.0004	0.31
15	399.104	5.14	4	HMDB02005	Methionine Sulfoxide	165.046	399.104	3.72	0.0001	0.28
16	399.104	5.14	4	HMDB02005	Methionine Sulfoxide - Isomer	165.046	399.104	4.2	0.0001	0.2
17	353.117	5.23	4.15	HMDB00719	L-Homoserine	119.058	353.117	4.05	0	0.1
18	339.103	5.23	4.15	HMDB00187	L-Serine	105.043	339.101	4.4	0.0021	0.25
19	399.105	5.41	4.44	HMDB02005	Methionine Sulfoxide - Isomer	165.046	399.104	4.2	0.0003	0.24
20	353.116	5.47	4.5	HMDB00719	L-Homoserine	119.058	353.117	4.05	0.0009	0.45
21	339.102	5.58	4.61	HMDB00187	L-Serine	105.043	339.101	4.4	0.0007	0.21
22	381.112	5.61	4.63	HMDB00148	L-Glutamic Acid	147.053	381.111	5.05	0.0007	0.42
23	367.099	5.66	4.68	HMDB00191	L-Aspartic Acid	133.037	367.096	5.16	0.0033	0.48
24	365.119	5.68	4.7	HMDB00725	Trans-4-Hydroxyl-L-Proline	131.058	365.117	5.17	0.002	0.47
25	365.119	5.86	4.87	HMDB00725	Trans-4-Hydroxyl-L-Proline	131.058	365.117	5.17	0.0021	0.3
26	365.118	6.06	5.06	HMDB00725	Trans-4-Hydroxyl-L-Proline	131.058	365.117	5.17	0.0017	0.11
27	381.113	6.12	5.12	HMDB00148	L-Glutamic Acid	147.053	381.111	5.05	0.001	0.07
28	365.118	6.25	5.24	HMDB00725	Trans-4-Hydroxyl-L-Proline	131.058	365.117	5.17	0.0009	0.07
29	353.118	6.31	5.3	HMDB00167	L-Threonine	119.058	353.117	5.79	0.001	0.49
30	353.118	6.62	5.59	HMDB00167	L-Threonine	119.058	353.117	5.79	0.0012	0.2
31	353.118	6.92	5.94	HMDB00167	L-Threonine	119.058	353.117	5.79	0.001	0.15
32	295.112	7.02	6.09	HMDB00149	Ethanolamine	61.0528	295.111	6	0.0005	0.09
33	395.127	7.07	6.18	HMDB00510	Aminoadipic acid	161.069	395.127	5.97	0.0003	0.21
34	309.091	7.14	6.29	HMDB00123	Glycine	75.032	309.09	6.59	0.001	0.3
35	323.107	7.54	6.94	HMDB00056	Beta-Alanine	89.0477	323.106	7.24	0.0006	0.3
36	323.107	7.91	7.55	HMDB00056	Beta-Alanine	89.0477	323.106	7.24	0.0009	0.31
37	323.107	7.91	7.55	HMDB00161	L-Alanine	89.0477	323.106	7.57	0.0009	0.02
38	323.107	8.36	7.97	HMDB00161	L-Alanine	89.0477	323.106	7.57	0.0013	0.4
39	337.122	8.42	8.03	HMDB00112	Gamma-Aminobutyric acid	103.063	337.122	7.79	0.0001	0.24
40	337.124	8.62	8.21	HMDB00112	Gamma-Aminobutyric acid	103.063	337.122	7.79	0.0027	0.42
41	337.124	8.62	8.21	HMDB03911	3-Aminoisobutanoic acid	103.063	337.122	8.67	0.0027	0.46
42	351.138	8.81	8.39	HMDB03355	5-Aminopentanoic acid	117.079	351.137	8.68	0.0004	0.29
43	363.102	9.66	9.16	HMDB00148	L-Glutamic Acid - H2O	147.053	363.101	9.46	0.0009	0.3
44	337.123	9.78	9.27	HMDB00452	L-Alpha-aminobutyric acid	103.063	337.122	9.13	0.0018	0.14
45	337.123	9.78	9.27	HMDB00650	D-Alpha-aminobutyric acid	103.063	337.122	9.23	0.0018	0.04
46	337.123	9.78	9.27	HMDB01906	2-Aminoisobutyric acid	103.063	337.122	8.91	0.0018	0.36
47	370.099	9.88	9.36	HMDB00157	Hypoxanthine - Isomer	136.038	370.097	9.65	0.0023	0.29
48	363.102	9.91	9.39	HMDB00148	L-Glutamic Acid - H2O	147.053	363.101	9.46	0.001	0.07
49	337.123	9.96	9.43	HMDB00452	L-Alpha-aminobutyric acid	103.063	337.122	9.13	0.0017	0.3
50	337.123	9.96	9.43	HMDB00650	D-Alpha-aminobutyric acid	103.063	337.122	9.23	0.0017	0.2
51	337.122	10.12	9.58	HMDB00452	L-Alpha-aminobutyric acid	103.063	337.122	9.13	0	0.45
52	337.122	10.12	9.58	HMDB00650	D-Alpha-aminobutyric acid	103.063	337.122	9.23	0	0.35
53	399.123	10.48	9.9	HMDB00897	7-Methylguanine	165.065	399.123	10.32	0.0001	0.42
54	399.123	10.48	9.9	HMDB03282	1-Methylguanine	165.065	399.123	9.57	0.0001	0.33
55	349.123	10.64	10.05	HMDB00162	L-Proline	115.063	349.122	10.18	0.0013	0.13
56	349.123	10.99	10.35	HMDB00162	L-Proline	115.063	349.122	10.18	0.001	0.17
57	422.17	11.29	10.59	HMDB28844	Glycyl-Isoleucine	188.116	422.174	10.78	0.0041	0.19
58	351.138	11.53	10.78	HMDB00883	L-Valine	117.079	351.137	10.81	0.0007	0.03
59	383.111	11.7	10.92	HMDB00696	L-Methionine	149.051	383.109	10.89	0.0013	0.03
60	346.086	11.73	10.95	HMDB00300	Uracil	112.027	346.086	11.34	0.0006	0.39
61	351.138	11.76	10.98	HMDB00883	L-Valine	117.079	351.137	10.81	0.0008	0.17
62	422.173	12.3	11.54	HMDB00759	Glycyl-L-Leucine	188.116	422.174	11.22	0.001	0.32
63	438.149	12.46	11.71	HMDB00929	L-Tryptophan	204.09	438.148	11.44	0.001	0.27
64	456.157	12.73	12	HMDB28848	Glycyl-Phenylalanine	222.1	456.159	11.65	0.0017	0.35
65	383.13	13.29	12.59	HMDB02099	6-Methyladenine	149.07	383.128	12.22	0.0011	0.37
66	383.13	13.29	12.59	HMDB02099	6-Methyladenine - Isomer	149.07	383.128	12.74	0.0011	0.15
67	399.139	13.46	12.77	HMDB00159	L-Phenylalanine	165.079	399.137	12.74	0.0014	0.03
68	365.154	13.69	12.96	HMDB00172	L-Isoleucine	131.095	365.153	13.06	0.0011	0.1
69	365.154	13.69	12.96	HMDB00557	L-Alloisoleucine	131.095	365.153	13.2	0.0011	0.24
70	365.154	13.69	12.96	HMDB00687	L-leucine	131.095	365.153	13.36	0.0011	0.4
71	365.154	13.95	13.18	HMDB00172	L-Isoleucine	131.095	365.153	13.06	0.0009	0.12
72	365.154	13.95	13.18	HMDB00557	L-Alloisoleucine	131.095	365.153	13.2	0.0009	0.02
73	365.154	13.95	13.18	HMDB00687	L-leucine	131.095	365.153	13.36	0.0009	0.18
74	364.626	14.16	13.36	HMDB04987	Alpha-Aspartyl-lysine	261.132	364.625	13.61	0.0014	0.25
75	365.149	14.24	13.42	HMDB00172	L-Isoleucine	131.095	365.153	13.06	0.0034	0.36
76	365.149	14.24	13.42	HMDB00557	L-Alloisoleucine	131.095	365.153	13.2	0.0034	0.22
77	365.149	14.24	13.42	HMDB00687	L-leucine	131.095	365.153	13.36	0.0034	0.06
78	345.093	14.65	13.77	HMDB00099	L-Cystathionine	222.067	345.092	13.34	0.0012	0.43
79	345.093	14.65	13.77	HMDB00099	L-Cystathionine - Isomer	222.067	345.092	13.69	0.0012	0.08
80	345.093	14.65	13.77	HMDB00455	Allocystathionine	222.067	345.092	13.33	0.0012	0.44
81	345.093	14.65	13.77	HMDB00455	Allocystathionine - Isomer	222.067	345.092	13.61	0.0012	0.16
82	416.117	14.8	13.9	HMDB00755	Hydroxyphenyllactici acid	182.058	416.116	14.39	0.0009	0.49
83	354.071	15.05	14.11	HMDB00192	L-Cystine	240.024	354.07	14.11	0.0011	0
84	300.104	16.35	16.29	HMDB00214	Ornithine	132.09	300.103	16.58	0.0006	0.29
85	307.113	17.06	17.47	HMDB00182	L-Lysine	146.106	307.111	17.47	0.0017	0
86	389.128	17.77	18.56	HMDB00177	L-Histidine	155.07	389.128	18.09	0.0003	0.47
87	324.597	20.44	22.66	HMDB00158	L-Tyrosine	181.074	324.595	22.65	0.0015	0.01
88	324.597	20.44	22.66	HMDB06050	o-Tyrosine	181.074	324.595	22.38	0.0015	0.28
89	289.078	24.19	26.41	HMDB00957	pyrocatechol	110.037	289.077	26.7	0.001	0.29

## Sheet: T-S1-B
Supplemental Table S1B. Identification of cellular metabolites by searching the accurate mass of the peak pairs against the HMDB library.
#	RT (s)	mz_light	mz_heavy	mz	distance	int_light	nCharge	nTag	Possible hits
1	128.55	375.078	377.085	141.02	2.00648	1090000	1	1	1
2	130.55	367.096	369.104	133.038	2.0073	1100000	1	1	3
3	135.604	449.114	451.119	215.056	2.005	29175	1	1	1
4	135.825	381.111	383.117	147.053	2.00552	14850	1	1	6
5	136.16	366.112	368.119	132.054	2.00653	3630000	1	1	4
6	151.91	380.128	382.135	146.07	2.00631	5385000	1	1	4
7	152.991	280.101	282.107	46.0422	2.0065	533125	1	1	1
8	154.6	449.115	451.121	215.057	2.00594	295375	1	1	1
9	167.814	449.115	451.121	215.057	2.00571	358969	1	1	1
10	182.6	366.113	368.119	132.054	2.00641	4930000	1	1	4
11	184.5	389.127	391.134	155.069	2.00672	18850	1	1	1
12	185.255	381.111	383.116	147.053	2.00485	30650	1	1	6
13	197.885	389.128	391.133	155.069	2.00546	14900	1	1	1
14	200.895	359.073	361.078	125.015	2.00497	150650	1	1	1
15	211.31	389.128	391.133	155.069	2.00552	23100	1	1	1
16	212.64	380.129	382.135	146.07	2.00634	7150000	1	1	4
17	214.391	517.15	519.157	283.092	2.00626	57237.5	1	1	2
18	215.346	359.074	361.079	125.015	2.00569	257066	1	1	1
19	220.65	339.102	341.108	105.043	2.00651	947000	1	1	2
20	227.007	517.151	519.156	283.092	2.0053	40500	1	1	2
21	230.26	365.117	367.124	131.059	2.00628	3980000	1	1	8
22	239.272	517.15	519.157	283.092	2.00655	123781	1	1	2
23	241.67	408.171	410.177	174.113	2.0064	422000	1	1	2
24	243.67	339.102	341.108	105.043	2.0064	716000	1	1	2
25	245.841	293.106	295.113	59.0482	2.00611	36718.8	1	1	1
26	245.963	380.129	382.135	146.07	2.00619	1151250	1	1	4
27	251.502	403.143	405.149	169.084	2.00611	18700	1	1	2
28	252.68	485.158	487.164	251.1	2.00618	10600	1	1	3
29	253.98	397.125	399.131	163.066	2.00602	70800	1	1	1
30	259.28	381.111	383.117	147.053	2.00611	98400	1	1	6
31	261.28	424.117	426.124	190.059	2.00624	12200	1	1	1
32	262.059	408.171	410.177	174.112	2.00664	910375	1	1	2
33	262.595	414.122	416.127	180.063	2.00516	14375	1	1	17
34	263.633	509.169	511.175	275.111	2.00592	10886.2	1	1	2
35	267.298	366.112	368.119	132.054	2.00658	2732500	1	1	4
36	270.46	502.139	504.144	268.08	2.00544	48378.1	1	1	4
37	274.871	414.122	416.128	180.063	2.00602	25618.8	1	1	17
38	275.78	501.115	505.128	34.0056	4.0133	8610	1	2	1
39	278.7	365.118	367.124	131.059	2.00638	5270000	1	1	8
40	288.823	502.139	504.145	268.081	2.00625	67812.5	1	1	4
41	294.79	380.128	382.135	146.07	2.00668	8270000	1	1	4
42	303.29	422.21	424.215	188.151	2.00555	12800	1	1	1
43	307.52	367.096	369.102	133.038	2.00571	73800	1	1	3
44	308.558	399.104	401.11	165.046	2.00562	87137.5	1	1	1
45	313.948	353.117	355.123	119.058	2.00647	17095.3	1	1	3
46	315.354	422.21	424.214	188.151	2.00433	18800	1	1	1
47	323.31	515.173	517.176	281.115	2.00267	16400	1	1	4
48	324.664	399.105	401.111	165.046	2.00591	108188	1	1	1
49	328.265	353.116	355.123	119.057	2.00706	29639.8	1	1	3
50	329.506	436.201	438.207	202.143	2.00603	152100	1	1	2
51	334.983	339.102	341.108	105.043	2.00642	4.45733e+06	1	1	2
52	336.704	381.112	383.119	147.054	2.00639	4248125	1	1	6
53	341.05	485.159	487.166	251.1	2.00704	5730	1	1	3
54	342.771	501.156	503.163	267.097	2.00736	757001	1	1	3
55	348.058	399.105	401.11	165.046	2.00563	88741.5	1	1	1
56	348.184	436.202	438.208	202.144	2.00585	303438	1	1	2
57	356.79	309.091	311.097	75.0326	2.00628	4960000	1	1	1
58	357.739	403.144	405.15	169.086	2.00581	281438	1	1	2
59	367.311	381.112	383.119	147.054	2.00633	5.60973e+06	1	1	6
60	374.814	365.117	367.124	131.059	2.00639	4.22941e+06	1	1	8
61	378.655	353.118	355.124	119.059	2.00633	2.99281e+06	1	1	3
62	381.462	348.102	350.109	114.044	2.00662	725734	1	1	2
63	388.1	462.169	464.176	228.111	2.00663	12300	1	1	1
64	388.719	519.191	521.197	285.132	2.006	22687.5	1	1	1
65	397.926	348.102	350.109	114.044	2.00653	541836	1	1	2
66	399.928	379.133	381.139	145.074	2.00641	215625	1	1	6
67	402.543	422.186	424.191	188.127	2.00553	11240	1	1	1
68	407.85	387.122	389.129	153.064	2.00664	26000	1	1	1
69	408.687	519.191	521.196	285.133	2.00495	21717	1	1	1
70	415.477	353.118	355.124	119.059	2.00668	2.72906e+06	1	1	3
71	421.024	295.112	297.118	61.0533	2.00658	5.78844e+06	1	1	1
72	421.375	462.17	464.177	228.112	2.00668	296900	1	1	1
73	424.37	395.127	397.133	161.069	2.0058	20125	1	1	1
74	424.86	323.106	325.113	89.0477	2.00657	39700	1	1	4
75	445.301	362.118	364.126	128.06	2.00834	1.00174e+06	1	1	1
76	447.566	462.17	464.177	228.112	2.00678	545286	1	1	1
77	449.16	279.08	281.086	45.0217	2.00643	57400	1	1	1
78	452.34	323.107	325.113	89.0483	2.00611	208720	1	1	4
79	453.95	350.153	352.16	116.095	2.00684	269000	1	1	1
80	455.152	422.186	424.192	188.128	2.00576	216875	1	1	1
81	462.691	348.101	350.107	114.043	2.0061	108031	1	1	2
82	466.476	394.144	396.15	160.086	2.00596	555062	1	1	1
83	483.121	351.137	353.143	117.079	2.00618	30787.5	1	1	5
84	493.827	483.145	485.15	249.086	2.00496	20162.5	1	1	2
85	504.203	406.143	408.147	172.084	2.00468	28370.3	1	1	2
86	505.015	337.122	339.128	103.063	2.00631	53450	1	1	8
87	508.299	353.117	355.124	119.059	2.00623	416250	1	1	3
88	511.822	531.149	533.153	297.091	2.00418	12890	1	1	1
89	516.314	395.127	397.134	161.068	2.0069	13637.5	1	1	1
90	526.083	406.143	408.149	172.085	2.00587	42837.5	1	1	2
91	526.286	408.159	410.165	174.1	2.00639	85093.8	1	1	1
92	528.636	351.138	353.144	117.079	2.00651	221750	1	1	5
93	530.327	381.113	383.119	147.054	2.00658	1034250	1	1	6
94	532.98	363.102	365.108	129.043	2.00637	4520000	1	1	5
95	535.646	517.15	519.157	283.092	2.00667	18878.1	1	1	2
96	542.904	478.13	480.136	244.071	2.00659	2.73719e+06	1	1	3
97	543.404	366.102	368.107	132.043	2.00578	128462	1	1	7
98	547.624	457.089	459.096	446.062	2.00691	26746.9	2	2	1
99	547.705	502.138	504.145	268.079	2.00724	16052.5	1	1	4
100	547.937	385.109	387.115	151.05	2.00639	732812	1	1	3
101	553.307	344.107	346.113	110.048	2.00619	56450	1	1	1
102	556.072	363.102	365.108	129.044	2.00638	6.63406e+06	1	1	5
103	558.3	395.128	397.135	161.07	2.00672	7980000	1	1	1
104	561.378	362.117	364.123	128.059	2.00589	138625	1	1	1
105	562.505	457.09	459.096	446.063	2.00598	11015	2	2	1
106	565.43	309.127	311.133	75.0687	2.00583	35750	1	1	2
107	574.29	321.091	323.098	87.0329	2.00688	24000	1	1	1
108	579.766	363.102	365.108	129.044	2.00625	4.10989e+06	1	1	5
109	588.149	436.201	438.206	202.143	2.0052	94137.5	1	1	2
110	592.53	453.169	455.174	219.11	2.00551	11355	1	1	2
111	594.606	363.102	365.108	129.044	2.00652	6.16038e+06	1	1	5
112	595.805	481.084	483.09	247.025	2.00594	11970	1	1	1
113	603.778	460.119	462.125	226.06	2.00661	2648125	1	1	1
114	607.404	337.122	339.129	103.063	2.00705	30137.5	1	1	8
115	608.531	379.133	381.14	145.075	2.00638	4882500	1	1	6
116	613.476	366.102	368.107	132.043	2.00537	36812.5	1	1	7
117	618.832	398.127	400.134	164.069	2.00676	15703.8	1	1	6
118	625.495	321.127	323.132	87.0685	2.00544	61700	1	1	1
119	628.587	399.124	401.13	165.065	2.00679	28125	1	1	4
120	634.505	523.159	525.166	289.101	2.00676	10650	1	1	1
121	637.92	409.143	411.148	175.084	2.00545	14850	1	1	1
122	650.672	370.098	372.104	136.04	2.00623	7773750	1	1	1
123	651.38	428.138	430.145	194.08	2.00658	6630	1	1	1
124	659.526	349.123	351.129	115.064	2.00635	11411250	1	1	2
125	661.17	477.164	479.17	243.106	2.00577	2880000	1	1	1
126	661.651	629.211	633.224	162.101	4.01272	46293.8	1	2	1
127	668.38	513.115	517.13	46.0053	4.01567	12400	1	2	1
128	680.638	380.163	382.169	146.105	2.00621	23225	1	1	4
129	681.13	447.104	449.11	426.092	2.00562	97300	2	2	1
130	681.485	408.159	410.165	174.101	2.00622	147438	1	1	1
131	691.524	351.138	353.145	117.08	2.00649	4883750	1	1	5
132	694.42	792.315	794.322	558.257	2.0065	38200	1	1	1
133	696.704	337.122	339.127	103.064	2.00555	71065.6	1	1	8
134	701.98	383.111	385.117	149.052	2.00598	3057500	1	1	1
135	703.727	346.086	348.093	112.028	2.00696	589969	1	1	1
136	705.574	351.138	353.145	117.08	2.00637	5506875	1	1	5
137	713.827	321.091	323.097	87.0328	2.00625	99512.5	1	1	1
138	722.45	660.149	662.157	426.09	2.00831	6610	1	1	1
139	727.18	447.104	449.111	426.091	2.00692	877000	2	2	1
140	728.14	377.108	379.113	286.099	2.00498	6090	2	2	1
141	734.502	409.144	411.15	175.086	2.00638	834750	1	1	1
142	736.067	508.182	510.189	274.124	2.00652	139066	1	1	1
143	737.725	422.173	424.18	188.115	2.00698	27056.2	1	1	3
144	740.86	395.128	397.134	161.07	2.00627	423375	1	1	1
145	741.29	447.104	449.111	426.092	2.00661	337000	2	2	1
146	747.395	438.149	440.155	204.091	2.00608	369203	1	1	1
147	748.479	629.21	633.223	162.101	4.01235	28743.8	1	2	1
148	754.577	508.181	510.189	274.123	2.00735	16000	1	1	1
149	755.279	400.086	402.092	166.028	2.0055	44934.4	1	1	3
150	766.89	319.112	321.117	85.0536	2.00553	112100	1	1	1
151	778.605	409.144	411.15	175.086	2.00633	5070000	1	1	1
152	784.406	321.116	323.123	174.115	2.00656	726929	2	2	1
153	784.7	426.121	428.127	192.062	2.00631	30900	1	1	1
154	792.715	448.19	450.197	214.132	2.00632	14950	1	1	1
155	797.265	383.13	385.134	149.071	2.00475	26300	1	1	4
156	802.456	360.102	362.11	126.044	2.00778	1.39894e+06	1	1	2
157	805.989	371.633	373.64	275.15	2.00693	24234.1	2	2	2
158	807.822	399.139	401.145	165.08	2.00633	6.77398e+06	1	1	4
159	821.188	365.154	367.16	131.096	2.00635	7231250	1	1	6
160	829.88	377.117	379.123	143.058	2.00635	101000	1	1	1
161	837.178	365.154	367.16	131.095	2.0064	1.11036e+07	1	1	6
162	861.13	307.112	309.119	73.0532	2.00702	486000	1	1	3
163	862.62	397.126	399.131	163.067	2.0055	15900	1	1	1
164	862.942	612.268	616.281	145.158	4.01287	55600	1	2	1
165	867.32	597.117	599.121	363.058	2.00484	37600	1	1	2
166	867.4	626.283	630.295	159.173	4.01272	6790	1	2	1
167	867.75	322.074	324.08	88.016	2.00607	19650	1	1	2
168	871.61	300.086	302.093	132.056	2.00671	9500	2	2	1
169	872.61	309.584	311.588	151.051	2.00469	13000	2	2	3
170	878.838	345.093	347.1	222.07	2.00692	37000	2	2	1
171	883.235	555.152	557.157	321.093	2.00576	231500	1	1	1
172	888.217	416.117	418.122	182.059	2.00521	12350	1	1	6
173	892.63	612.267	616.28	145.158	4.01283	15275	1	2	1
174	892.893	629.211	633.224	162.101	4.01309	43625	1	2	1
175	893.58	462.206	464.211	228.148	2.00548	21412.5	1	1	2
176	902.75	354.071	356.078	240.026	2.00653	182000	2	2	1
177	905.492	387.101	389.106	153.042	2.00592	48837.5	1	1	2
178	905.979	363.138	365.145	129.08	2.00643	3792500	1	1	4
179	911.641	612.268	616.28	145.158	4.01241	50187.5	1	2	1
180	927.44	502.097	504.104	268.038	2.00723	19862.5	1	1	1
181	928.087	496.19	498.197	262.131	2.00673	18156.2	1	1	2
182	929.061	393.148	395.154	159.089	2.00658	33403.1	1	1	6
183	931.965	431.126	433.131	197.067	2.00529	20250	1	1	2
184	938.4	411.105	413.112	177.046	2.00734	8470	1	1	1
185	940.815	502.097	504.104	268.039	2.00736	17362.5	1	1	1
186	948.03	612.266	616.279	145.157	4.01318	11100	1	2	1
187	949.914	351.138	353.145	117.08	2.00659	612125	1	1	5
188	957.72	350.646	352.653	233.176	2.00643	42431.2	2	2	1
189	966.82	501.115	505.128	34.0056	4.01336	60559.4	1	2	1
190	966.877	368.1	370.106	268.083	2.00673	61681.2	2	2	3
191	967.855	413.153	415.162	179.095	2.00874	26650	1	1	2
192	971.727	311.593	313.6	155.069	2.00682	77993.8	2	2	1
193	975.735	371.632	373.639	275.148	2.00602	10237.5	2	2	2
194	977.062	342.63	344.637	217.144	2.00657	14375	2	2	1
195	980.38	346.099	348.106	224.081	2.00688	10500	2	2	3
196	980.965	300.104	302.11	132.091	2.00657	40300	2	2	2
197	987.45	494.689	496.695	521.261	2.00605	6890	2	2	1
198	1004.84	407.164	409.17	173.106	2.00623	44875	1	1	4
199	1005.29	379.169	381.174	145.111	2.00498	26940.6	1	1	1
200	1006.92	372.09	374.097	138.032	2.00629	106109	1	1	4
201	1014.64	441.148	443.154	207.089	2.00623	35781.2	1	1	3
202	1016.48	427.132	429.138	193.074	2.00583	18200	1	1	3
203	1019.82	312.085	314.091	156.053	2.0063	839000	2	2	3
204	1026.08	457.141	459.148	223.083	2.00675	15000	1	1	1
205	1028.54	407.164	409.17	173.106	2.00622	146750	1	1	4
206	1034.98	413.154	415.16	179.096	2.00581	573781	1	1	2
207	1037.61	347.112	349.12	226.108	2.00724	13122.2	2	2	1
208	1039.57	367.608	369.615	267.099	2.00734	318000	2	2	2
209	1042.57	356.1	358.104	244.083	2.00472	7290	2	2	1
210	1047.28	375.605	377.612	283.094	2.00654	88753.1	2	2	2
211	1048.79	366.101	368.107	132.043	2.00535	34500	1	1	7
212	1063.17	379.17	381.176	145.112	2.00639	2143750	1	1	1
213	1066.14	389.128	391.134	155.07	2.00582	90837.5	1	1	1
214	1067.29	312.595	314.601	157.073	2.00651	563481	2	2	2
215	1070.56	339.097	341.104	210.076	2.00718	11268.8	2	2	1
216	1078.28	356.094	358.101	244.072	2.00729	28068.8	2	2	3
217	1086.58	382.109	384.115	296.102	2.0059	7532.5	2	2	1
218	1093.63	389.119	391.125	310.122	2.00609	6790	2	2	1
219	1097.31	487.152	489.159	253.094	2.00647	16150	1	1	1
220	1098.67	541.143	543.147	307.085	2.00413	9710	1	1	1
221	1100.11	356.094	358.101	244.071	2.00723	40293.8	2	2	2
222	1100.38	298.088	300.095	128.059	2.00717	538375	2	2	1
223	1109.55	466.179	468.185	232.121	2.00516	11031.2	1	1	1
224	1110.73	356.094	358.101	244.072	2.00668	248125	2	2	3
225	1117.69	328.134	330.142	188.151	2.00786	9650	2	2	1
226	1124.66	423.142	425.147	189.084	2.00414	8380	1	1	1
227	1130.88	348.114	350.123	228.112	2.0085	32100	2	2	1
228	1134.33	328.117	330.124	188.118	2.00643	57015.6	2	2	3
229	1140.53	386.107	388.114	152.048	2.00707	8720	1	1	9
230	1143.63	528.162	532.175	61.0531	4.01303	52643.8	1	2	1
231	1145.62	321.109	323.115	174.102	2.00609	35200	2	2	1
232	1153.1	292.106	294.112	116.095	2.00635	41381.2	2	2	1
233	1153.63	379.169	381.175	145.111	2.00596	379156	1	1	1
234	1183.58	693.167	697.182	226.058	4.01466	12700	1	2	1
235	1187.8	346.085	348.091	112.027	2.00572	32000	1	1	1
236	1196.4	427.169	429.175	193.111	2.00578	371219	1	1	2
237	1199.57	335.167	337.174	202.218	2.00635	20450	2	2	1
238	1215.62	403.144	405.15	169.086	2.00632	11850	1	1	2
239	1225.89	325.098	327.105	182.079	2.00673	661500	2	2	4
240	1227.31	414.124	416.13	180.066	2.00658	35853.1	1	1	3
241	1229.02	373.086	375.091	139.027	2.00501	15050	1	1	2
242	1229.78	386.106	388.111	152.048	2.00527	26500	1	1	9
243	1263.07	437.173	439.181	203.115	2.00739	30275	1	1	1
244	1269.01	373.123	375.129	278.129	2.00615	17950	2	2	3
245	1284.22	598.101	600.105	364.043	2.0037	11340	1	1	1
246	1298.78	302.078	304.086	136.04	2.00803	6970	2	2	1
247	1306.2	435.194	437.2	201.136	2.00583	23762.5	1	1	1
248	1308.32	354.116	356.122	120.058	2.00622	190583	1	1	2
249	1320.01	354.117	356.124	120.058	2.00689	821875	1	1	2
250	1325.81	338.593	340.6	209.07	2.00689	24400	2	2	1
251	1331.07	345.601	347.608	223.086	2.00652	34637.5	2	2	1
252	1352.47	297.59	299.597	127.064	2.00694	57312.5	2	2	2
253	1353.41	577.157	581.169	110.048	4.01243	21537.5	1	2	1
254	1362.27	308.582	310.589	149.046	2.00788	29494	2	2	1
255	1363.36	313.593	315.6	159.069	2.00684	37796.9	2	2	1
256	1367.48	577.157	581.17	110.048	4.01339	27553.1	1	2	1
257	1375.96	344.106	346.112	110.048	2.00629	33750	1	1	1
258	1378.47	328.135	330.142	188.153	2.00714	9450	2	2	1
259	1385.41	302.078	304.085	136.039	2.00703	36912.5	2	2	1
260	1394.42	612.267	616.281	145.158	4.01364	55681.2	1	2	1
261	1425.7	323.606	325.613	179.096	2.00672	12752.5	2	2	2
262	1486.25	669.325	673.338	202.216	4.01276	15800	1	2	1
263	1486.88	570.291	572.293	336.233	2.00216	11450	1	1	22
264	1493.26	685.327	687.334	451.269	2.00664	11730	1	1	2
265	1499.84	320.067	322.073	172.018	2.00601	1060000	2	2	1
266	1500.01	319.067	321.073	170.016	2.00673	2.62333e+06	2	2	1
267	1500.28	403.064	405.067	169.005	2.00387	41690.6	1	1	1
268	1506.67	584.307	586.31	350.249	2.00231	9120	1	1	5
269	1513.8	735.344	737.35	501.286	2.00629	94962.5	1	1	5
270	1523.31	711.342	713.352	477.283	2.00998	7930	1	1	2
271	1532.61	761.358	763.368	527.3	2.00967	13400	1	1	4
272	1541.38	470.236	472.242	236.177	2.00621	69206.2	1	1	1
273	1549.9	533.34	535.347	299.282	2.00669	57257	1	1	3
274	1566.31	535.355	537.362	301.297	2.00683	21875	1	1	1
275	1574.1	489.314	491.321	255.256	2.00634	104750	1	1	1
276	1580.99	515.329	517.335	281.271	2.00567	7580	1	1	1
277	1602.43	687.345	689.35	453.287	2.00535	6765	1	1	2
278	1619.19	713.359	715.364	479.301	2.00503	21000	1	1	4
279	1631.72	713.359	715.365	479.3	2.00626	19620	1	1	4
280	1689.44	671.347	673.353	437.289	2.00596	7760	1	1	1
281	1707.69	671.349	673.352	437.29	2.00325	7600	1	1	1

## Sheet: T-S1-C
Supplemental Table S1C. Identification of cellular metabolites by searching the accurate mass of the peak pairs against the EML library with one reaction in MCID.
#	RT (s)	mz_light	mz_heavy	mz	distance	int_light	nCharge	nTag	Possible hits
1	125.47	425.185	427.191	191.127	2.00625	94200	1	1	2
2	126.55	426.169	428.176	192.11	2.00687	15700	1	1	4
3	128.55	375.078	377.085	141.02	2.00648	1090000	1	1	6
4	130.55	367.096	369.104	133.038	2.0073	1100000	1	1	28
5	134.16	411.169	413.175	177.111	2.00641	30500	1	1	4
6	135.604	449.114	451.119	215.056	2.005	29175	1	1	4
7	135.825	381.111	383.117	147.053	2.00552	14850	1	1	51
8	136.16	366.112	368.119	132.054	2.00653	3630000	1	1	12
9	150.91	675.241	677.249	441.183	2.0076	11385	1	1	7
10	151.91	380.128	382.135	146.07	2.00631	5385000	1	1	29
11	152.991	280.101	282.107	46.0422	2.0065	533125	1	1	20
12	154.6	449.115	451.121	215.057	2.00594	295375	1	1	4
13	157.452	474.143	476.15	240.085	2.00708	11725	1	1	25
14	166.464	675.242	677.249	441.184	2.0064	30723.8	1	1	7
15	167.814	449.115	451.121	215.057	2.00571	358969	1	1	4
16	170.328	474.144	476.15	240.085	2.00676	13441.2	1	1	29
17	182.087	573.132	575.138	339.074	2.00561	121653	1	1	4
18	182.6	366.113	368.119	132.054	2.00641	4930000	1	1	12
19	182.932	589.126	591.131	355.068	2.00548	13293.8	1	1	8
20	184.5	389.127	391.134	155.069	2.00672	18850	1	1	14
21	185.255	381.111	383.116	147.053	2.00485	30650	1	1	51
22	187.53	410.175	412.182	176.117	2.00655	8520	1	1	12
23	193.022	675.243	677.248	441.185	2.00498	13243.8	1	1	7
24	197.885	389.128	391.133	155.069	2.00546	14900	1	1	14
25	200.895	359.073	361.078	125.015	2.00497	150650	1	1	5
26	201.63	535.172	537.178	301.114	2.00597	17100	1	1	10
27	201.9	582.259	584.266	348.201	2.00657	15100	1	1	1
28	206.7	675.242	677.248	441.183	2.0067	13200	1	1	7
29	208.773	388.108	390.114	154.05	2.00638	591812	1	1	11
30	211.31	389.128	391.133	155.069	2.00552	23100	1	1	14
31	212.64	380.129	382.135	146.07	2.00634	7150000	1	1	29
32	214.391	517.15	519.157	283.092	2.00626	57237.5	1	1	38
33	215.346	359.074	361.079	125.015	2.00569	257066	1	1	5
34	216.543	513.189	515.195	279.131	2.00566	16439.4	1	1	15
35	218.285	675.244	677.249	441.186	2.0047	17150	1	1	7
36	220.65	339.102	341.108	105.043	2.00651	947000	1	1	21
37	223.22	389.093	391.1	155.035	2.00666	185500	1	1	5
38	227.007	517.151	519.156	283.092	2.0053	40500	1	1	39
39	230.26	365.117	367.124	131.059	2.00628	3980000	1	1	60
40	231.94	715.248	717.252	481.19	2.00418	7860	1	1	6
41	235.66	783.236	785.241	549.178	2.00474	42800	1	1	2
42	239.272	517.15	519.157	283.092	2.00655	123781	1	1	38
43	241.67	408.171	410.177	174.113	2.0064	422000	1	1	6
44	243.67	339.102	341.108	105.043	2.0064	716000	1	1	21
45	245.841	293.106	295.113	59.0482	2.00611	36718.8	1	1	1
46	245.963	380.129	382.135	146.07	2.00619	1151250	1	1	29
47	246.455	463.13	465.136	229.072	2.00599	21056.2	1	1	8
48	251.502	403.143	405.149	169.084	2.00611	18700	1	1	11
49	252.68	485.158	487.164	251.1	2.00618	10600	1	1	39
50	253.98	397.125	399.131	163.066	2.00602	70800	1	1	5
51	256.274	675.243	677.249	441.184	2.00649	48893.8	1	1	7
52	257.355	380.131	382.137	146.073	2.00627	1395000	1	1	10
53	258.354	513.189	515.194	279.131	2.00476	9205	1	1	16
54	259.28	381.111	383.117	147.053	2.00611	98400	1	1	51
55	261.28	424.117	426.124	190.059	2.00624	12200	1	1	15
56	262.059	408.171	410.177	174.112	2.00664	910375	1	1	6
57	262.205	493.174	495.179	259.115	2.00544	11975	1	1	10
58	262.595	414.122	416.127	180.063	2.00516	14375	1	1	87
59	263.633	509.169	511.175	275.111	2.00592	10886.2	1	1	16
60	265.42	417.158	419.165	183.1	2.00654	18737.5	1	1	8
61	267.298	366.112	368.119	132.054	2.00658	2732500	1	1	12
62	267.96	587.146	589.151	353.087	2.00492	7780	1	1	6
63	270.46	502.139	504.144	268.08	2.00544	48378.1	1	1	23
64	270.7	535.183	537.186	301.124	2.00362	11400	1	1	2
65	273.53	675.242	677.249	441.184	2.00656	57500	1	1	7
66	274.195	657.232	659.238	423.173	2.00592	14500	1	1	14
67	274.205	513.186	515.196	279.127	2.0103	11050	1	1	3
68	274.871	414.122	416.128	180.063	2.00602	25618.8	1	1	87
69	275.233	489.133	491.139	255.074	2.00621	89125	1	1	16
70	275.78	501.115	505.128	34.0056	4.0133	8610	1	2	8
71	277.526	417.159	419.164	183.101	2.0051	38134.4	1	1	8
72	278.7	365.118	367.124	131.059	2.00638	5270000	1	1	60
73	283.745	702.253	704.259	468.194	2.00652	6130	1	1	5
74	287.549	408.172	410.178	174.114	2.00618	1.51665e+06	1	1	3
75	288.823	502.139	504.145	268.081	2.00625	67812.5	1	1	23
76	290.72	479.16	481.166	245.101	2.00667	10735	1	1	14
77	294.79	380.128	382.135	146.07	2.00668	8270000	1	1	29
78	297.757	702.253	704.26	468.195	2.0067	14100	1	1	5
79	300.73	535.181	537.186	301.123	2.00444	24900	1	1	2
80	303.29	422.21	424.215	188.151	2.00555	12800	1	1	4
81	304.277	489.133	491.139	255.074	2.00633	119188	1	1	16
82	305.876	513.189	515.194	279.13	2.00521	21137.5	1	1	16
83	307.52	367.096	369.102	133.038	2.00571	73800	1	1	28
84	308.558	399.104	401.11	165.046	2.00562	87137.5	1	1	7
85	312.66	587.13	589.136	353.072	2.00566	39200	1	1	6
86	313.948	353.117	355.123	119.058	2.00647	17095.3	1	1	35
87	315.354	422.21	424.214	188.151	2.00433	18800	1	1	4
88	316.466	372.148	374.155	138.09	2.00638	18000	1	1	3
89	319.306	381.114	383.119	147.056	2.00459	1200625	1	1	4
90	323.31	515.173	517.176	281.115	2.00267	16400	1	1	32
91	324.577	436.153	438.159	202.095	2.00549	15250	1	1	19
92	324.664	399.105	401.111	165.046	2.00591	108188	1	1	7
93	326.59	535.173	537.179	301.114	2.00598	13145	1	1	10
94	326.75	499.175	501.18	265.117	2.00433	22900	1	1	39
95	328.265	353.116	355.123	119.057	2.00706	29639.8	1	1	35
96	328.76	388.108	390.113	154.049	2.00574	60800	1	1	11
97	329.033	513.191	515.196	279.132	2.00544	91971.9	1	1	15
98	329.506	436.201	438.207	202.143	2.00603	152100	1	1	4
99	331.76	691.27	693.28	457.211	2.01	11200	1	1	8
100	331.76	731.215	733.223	497.156	2.00869	6310	1	1	8
101	334.983	339.102	341.108	105.043	2.00642	4.45733e+06	1	1	21
102	335.26	747.222	749.225	513.164	2.00265	18500	1	1	7
103	336.704	381.112	383.119	147.054	2.00639	4248125	1	1	55
104	338.7	769.206	771.206	535.147	1.99997	15800	1	1	2
105	341.05	485.159	487.166	251.1	2.00704	5730	1	1	39
106	341.33	436.156	438.161	202.098	2.00459	18200	1	1	1
107	342.771	501.156	503.163	267.097	2.00736	757001	1	1	50
108	348.058	399.105	401.11	165.046	2.00563	88741.5	1	1	7
109	348.184	436.202	438.208	202.144	2.00585	303438	1	1	4
110	353.42	691.273	693.28	457.214	2.00784	11950	1	1	7
111	354.245	576.211	578.216	342.153	2.00531	10695	1	1	11
112	356.79	309.091	311.097	75.0326	2.00628	4960000	1	1	21
113	357.739	403.144	405.15	169.086	2.00581	281438	1	1	11
114	358.645	438.135	440.14	204.077	2.00454	21425	1	1	5
115	364.88	587.129	589.135	353.071	2.00589	42675	1	1	4
116	367.311	381.112	383.119	147.054	2.00633	5.60973e+06	1	1	55
117	372.446	449.258	451.264	215.199	2.00621	10502.5	1	1	2
118	372.649	576.212	578.218	342.154	2.00592	13803.1	1	1	11
119	374.814	365.117	367.124	131.059	2.00639	4.22941e+06	1	1	60
120	378.655	353.118	355.124	119.059	2.00633	2.99281e+06	1	1	35
121	379.3	292.112	294.118	58.0536	2.00621	263000	1	1	1
122	379.455	478.164	480.17	244.106	2.00562	7360	1	1	15
123	381.462	348.102	350.109	114.044	2.00662	725734	1	1	12
124	388.1	462.169	464.176	228.111	2.00663	12300	1	1	8
125	388.418	417.158	419.165	183.1	2.00646	29668.8	1	1	8
126	388.719	519.191	521.197	285.132	2.006	22687.5	1	1	9
127	389.465	290.567	292.572	113.016	2.0052	15850	2	2	1
128	390.465	319.588	321.594	171.059	2.00601	18225	2	2	1
129	393.555	555.158	557.162	321.099	2.00468	27993.8	1	1	9
130	395.4	373.143	375.15	139.084	2.00728	12800	1	1	2
131	397.926	348.102	350.109	114.044	2.00653	541836	1	1	12
132	398.11	587.129	589.136	353.071	2.00681	94400	1	1	4
133	399.691	290.567	292.573	113.017	2.00619	10396.9	2	2	1
134	399.928	379.133	381.139	145.074	2.00641	215625	1	1	54
135	402.543	422.186	424.191	188.127	2.00553	11240	1	1	7
136	406.94	319.588	321.594	171.06	2.00569	12450	2	2	1
137	407.85	387.122	389.129	153.064	2.00664	26000	1	1	10
138	408.687	519.191	521.196	285.133	2.00495	21717	1	1	10
139	413.015	647.249	649.256	413.191	2.00625	8815	1	1	6
140	415.11	411.141	413.146	177.082	2.00576	27587.5	1	1	6
141	415.477	353.118	355.124	119.059	2.00668	2.72906e+06	1	1	35
142	420.863	431.174	433.18	197.116	2.0057	15037.5	1	1	3
143	421.024	295.112	297.118	61.0533	2.00658	5.78844e+06	1	1	15
144	421.375	462.17	464.177	228.112	2.00668	296900	1	1	8
145	421.46	405.159	407.165	171.1	2.00644	14600	1	1	6
146	421.873	673.26	675.271	439.202	2.01018	23475	1	1	5
147	424.37	395.127	397.133	161.069	2.0058	20125	1	1	48
148	424.86	323.106	325.113	89.0477	2.00657	39700	1	1	38
149	427.87	625.199	627.205	391.141	2.00602	12600	1	1	21
150	429.28	363.149	365.155	129.091	2.00563	298375	1	1	4
151	430.936	555.158	557.164	321.1	2.0058	13671.9	1	1	8
152	433.152	491.194	493.202	257.136	2.00792	16100	1	1	6
153	433.202	505.222	507.225	271.163	2.00336	20065.3	1	1	1
154	433.399	479.232	481.239	245.174	2.00678	245810	1	1	6
155	439.022	600.201	602.207	366.142	2.00646	10503.4	1	1	11
156	445.301	362.118	364.126	128.06	2.00834	1.00174e+06	1	1	16
157	447.566	462.17	464.177	228.112	2.00678	545286	1	1	8
158	448.02	303.116	305.123	69.0575	2.00671	9495	1	1	2
159	448.902	477.181	479.186	243.123	2.00541	33975	1	1	8
160	449.16	279.08	281.086	45.0217	2.00643	57400	1	1	8
161	450.726	334.122	336.129	100.064	2.00643	374194	1	1	3
162	452.34	323.107	325.113	89.0483	2.00611	208720	1	1	38
163	453.89	587.13	589.136	353.071	2.00602	102000	1	1	6
164	453.95	350.153	352.16	116.095	2.00684	269000	1	1	9
165	454.493	491.195	493.202	257.136	2.00703	23984.4	1	1	6
166	455.152	422.186	424.192	188.128	2.00576	216875	1	1	7
167	456.17	378.221	380.228	144.162	2.0072	28700	1	1	2
168	456.673	436.154	438.16	202.095	2.00685	11839.4	1	1	19
169	458.726	337.159	339.166	103.101	2.00657	3.25848e+06	1	1	5
170	461.159	789.309	791.313	555.25	2.00457	27581.2	1	1	3
171	462.18	787.302	789.308	553.244	2.00528	66400	1	1	4
172	462.691	348.101	350.107	114.043	2.0061	108031	1	1	12
173	466.476	394.144	396.15	160.086	2.00596	555062	1	1	35
174	470.908	450.169	452.174	216.111	2.00496	15625	1	1	15
175	471.476	600.201	602.208	366.143	2.00716	17388	1	1	12
176	473.453	463.238	465.243	229.179	2.00581	32646.9	1	1	2
177	474.923	539.21	541.215	305.152	2.00459	9565	1	1	8
178	478.709	436.154	438.16	202.096	2.00571	15387.5	1	1	19
179	479.431	436.225	438.23	202.167	2.00488	10287.5	1	1	3
180	483.121	351.137	353.143	117.079	2.00618	30787.5	1	1	38
181	493.827	483.145	485.15	249.086	2.00496	20162.5	1	1	41
182	496.625	431.175	433.18	197.116	2.0057	12825	1	1	3
183	500.002	413.12	415.126	179.062	2.00611	37131.2	1	1	11
184	504.203	406.143	408.147	172.084	2.00468	28370.3	1	1	9
185	505.015	337.122	339.128	103.063	2.00631	53450	1	1	45
186	508.299	353.117	355.124	119.059	2.00623	416250	1	1	35
187	509.366	361.195	363.201	127.136	2.00635	96453.1	1	1	1
188	510.88	587.123	589.134	353.064	2.01176	8330	1	1	28
189	511.822	531.149	533.153	297.091	2.00418	12890	1	1	10
190	512.075	478.164	480.17	244.106	2.00611	19550	1	1	15
191	512.431	367.132	369.138	133.074	2.00655	16581.2	1	1	40
192	514.374	392.164	394.17	158.106	2.00622	30990.6	1	1	6
193	516.31	503.196	505.2	269.138	2.00398	10105	1	1	8
194	516.314	395.127	397.134	161.068	2.0069	13637.5	1	1	46
195	523.1	625.2	627.207	391.142	2.0073	12050	1	1	22
196	523.742	476.222	478.228	242.164	2.006	20650	1	1	4
197	523.803	450.17	452.176	216.111	2.00578	14537.5	1	1	15
198	526.083	406.143	408.149	172.085	2.00587	42837.5	1	1	9
199	526.286	408.159	410.165	174.1	2.00639	85093.8	1	1	35
200	528.636	351.138	353.144	117.079	2.00651	221750	1	1	38
201	528.763	587.13	589.135	353.071	2.00529	24993.8	1	1	6
202	530.327	381.113	383.119	147.054	2.00658	1034250	1	1	55
203	532.04	503.199	505.202	269.141	2.00337	12200	1	1	1
204	532.98	363.102	365.108	129.043	2.00637	4520000	1	1	28
205	535.646	517.15	519.157	283.092	2.00667	18878.1	1	1	38
206	539.26	450.17	452.176	216.112	2.00572	21500	1	1	15
207	541.82	578.212	580.218	344.153	2.00629	26750	1	1	1
208	542.904	478.13	480.136	244.071	2.00659	2.73719e+06	1	1	31
209	543.404	366.102	368.107	132.043	2.00578	128462	1	1	69
210	547.705	502.138	504.145	268.079	2.00724	16052.5	1	1	20
211	547.862	535.177	537.186	301.119	2.00889	14325	1	1	15
212	547.937	385.109	387.115	151.05	2.00639	732812	1	1	11
213	552.27	587.129	589.136	353.071	2.00628	156000	1	1	4
214	553.307	344.107	346.113	110.048	2.00619	56450	1	1	8
215	554.135	558.196	560.205	324.138	2.00856	10245	1	1	5
216	555.419	367.133	369.138	133.074	2.00535	16943.8	1	1	40
217	556.072	363.102	365.108	129.044	2.00638	6.63406e+06	1	1	28
218	558.3	395.128	397.135	161.07	2.00672	7980000	1	1	48
219	559.315	463.237	465.242	229.178	2.00544	10650	1	1	2
220	560.512	513.189	515.195	279.131	2.00504	11713.1	1	1	15
221	561.378	362.117	364.123	128.059	2.00589	138625	1	1	16
222	563.01	732.338	734.343	498.28	2.0048	17800	1	1	33
223	564.362	549.193	551.198	315.135	2.00498	11138.8	1	1	13
224	565.43	309.127	311.133	75.0687	2.00583	35750	1	1	13
225	574.29	321.091	323.098	87.0329	2.00688	24000	1	1	18
226	579.1	438.169	440.174	204.111	2.00483	8060	1	1	11
227	579.766	363.102	365.108	129.044	2.00625	4.10989e+06	1	1	28
228	581.511	551.176	553.183	317.118	2.00659	99375	1	1	3
229	584.846	476.185	478.191	242.127	2.00618	141875	1	1	6
230	584.944	569.174	571.179	335.116	2.00507	13687.5	1	1	9
231	585.03	578.213	580.216	344.155	2.003	11700	1	1	1
232	588.149	436.201	438.206	202.143	2.0052	94137.5	1	1	4
233	592.53	453.169	455.174	219.11	2.00551	11355	1	1	18
234	594.085	691.166	695.178	224.057	4.01226	12337.5	1	2	2
235	594.606	363.102	365.108	129.044	2.00652	6.16038e+06	1	1	28
236	595.805	481.084	483.09	247.025	2.00594	11970	1	1	3
237	596.066	478.201	480.208	244.142	2.00682	25896.6	1	1	6
238	598.451	671.242	673.249	437.184	2.00734	34500	1	1	2
239	599.545	376.18	378.186	142.121	2.00679	29025	1	1	2
240	603.778	460.119	462.125	226.06	2.00661	2648125	1	1	26
241	606.93	540.135	542.141	306.077	2.00591	16913.8	1	1	4
242	607.404	337.122	339.129	103.063	2.00705	30137.5	1	1	45
243	608.13	420.159	422.165	186.1	2.00667	36350	1	1	15
244	608.531	379.133	381.14	145.075	2.00638	4882500	1	1	54
245	613.476	366.102	368.107	132.043	2.00537	36812.5	1	1	69
246	614.159	438.17	440.175	204.111	2.00526	32606.2	1	1	11
247	614.433	346.088	348.094	224.059	2.00625	12625	2	2	3
248	617.423	478.2	480.206	244.142	2.00628	65075	1	1	6
249	618.812	334.122	336.128	100.064	2.00651	39787.5	1	1	3
250	618.832	398.127	400.134	164.069	2.00676	15703.8	1	1	74
251	621.047	550.198	552.205	316.14	2.00662	214214	1	1	4
252	625.495	321.127	323.132	87.0685	2.00544	61700	1	1	29
253	625.724	571.205	573.215	337.147	2.01001	25078.1	1	1	7
254	628.03	558.196	560.202	324.137	2.0059	17055	1	1	5
255	628.587	399.124	401.13	165.065	2.00679	28125	1	1	36
256	629.047	355.094	357.1	242.071	2.00658	848267	2	2	11
257	630.08	628.227	630.231	394.169	2.00324	14600	1	1	4
258	631.616	506.175	508.182	272.117	2.00677	14687.5	1	1	10
259	634.25	550.198	552.205	316.14	2.007	364500	1	1	4
260	634.617	540.135	542.142	306.077	2.00692	52521.9	1	1	4
261	637.92	409.143	411.148	175.084	2.00545	14850	1	1	41
262	638.36	820.316	822.323	586.258	2.00704	12800	1	1	8
263	639.062	427.136	429.142	193.077	2.00602	23281.2	1	1	7
264	639.251	376.132	378.139	142.074	2.00661	50212.5	1	1	13
265	643.668	355.094	357.1	242.072	2.00558	153212	2	2	7
266	648.893	578.211	580.218	344.153	2.00646	24962.1	1	1	1
267	650.672	370.098	372.104	136.04	2.00623	7773750	1	1	10
268	650.672	603.148	605.155	369.09	2.00635	82196.9	1	1	7
269	651.38	428.138	430.145	194.08	2.00658	6630	1	1	33
270	656.17	805.321	807.327	571.263	2.00561	16900	1	1	4
271	657.148	563.216	565.221	329.157	2.00565	14822.5	1	1	3
272	659.526	349.123	351.129	115.064	2.00635	11411250	1	1	33
273	661.17	477.164	479.17	243.106	2.00577	2880000	1	1	1
274	661.651	629.211	633.224	162.101	4.01272	46293.8	1	2	15
275	662.03	496.135	498.141	524.154	2.0057	8080	2	2	1
276	666.624	515.13	519.143	48.0207	4.01305	33562.5	1	2	18
277	668.38	513.115	517.13	46.0053	4.01567	12400	1	2	20
278	671.018	362.101	364.107	256.085	2.00631	7162.5	2	2	3
279	672.4	599.226	601.233	365.167	2.00736	87600	1	1	19
280	674.19	550.198	552.204	316.14	2.00614	55000	1	1	4
281	676.19	649.254	651.255	415.196	2.0009	11700	1	1	5
282	677.13	570.213	572.222	336.155	2.00949	11800	1	1	8
283	678.295	515.131	519.143	48.0214	4.01255	36200	1	2	18
284	678.753	678.26	680.267	444.202	2.00697	43325	1	1	1
285	680.354	420.159	422.166	186.1	2.00688	63300	1	1	15
286	680.638	380.163	382.169	146.105	2.00621	23225	1	1	23
287	681.13	447.104	449.11	426.092	2.00562	97300	2	2	9
288	681.485	408.159	410.165	174.101	2.00622	147438	1	1	35
289	682.61	695.34	697.342	461.282	2.00143	7380	1	1	10
290	682.8	622.228	624.235	388.169	2.00751	24450	1	1	1
291	685.2	335.143	337.148	101.084	2.00554	79800	1	1	20
292	685.638	376.133	378.139	142.075	2.00634	181500	1	1	13
293	687.979	805.324	807.331	571.266	2.00665	115225	1	1	3
294	688.41	486.169	488.175	252.111	2.0056	13500	1	1	9
295	691.524	351.138	353.145	117.08	2.00649	4883750	1	1	38
296	693.11	578.211	580.218	344.152	2.00719	15550	1	1	1
297	694.42	792.315	794.322	558.257	2.0065	38200	1	1	12
298	696.704	337.122	339.127	103.064	2.00555	71065.6	1	1	45
299	697.355	706.274	708.279	472.215	2.00547	31390.9	1	1	2
300	698.11	605.155	607.163	371.097	2.00781	7215	1	1	9
301	698.986	601.145	603.151	367.087	2.00605	16687.5	1	1	8
302	701.866	654.258	656.264	420.199	2.0063	22787.5	1	1	2
303	701.98	383.111	385.117	149.052	2.00598	3057500	1	1	9
304	703.45	578.221	580.226	344.163	2.00463	11800	1	1	9
305	703.727	346.086	348.093	112.028	2.00696	589969	1	1	10
306	704.92	691.268	693.275	457.21	2.00672	8290	1	1	11
307	705.574	351.138	353.145	117.08	2.00637	5506875	1	1	38
308	709.16	657.243	659.253	423.185	2.01024	9410	1	1	6
309	711.08	447.104	449.111	213.045	2.00689	39900	1	1	4
310	713.165	599.229	601.236	365.171	2.00718	19250	1	1	19
311	713.827	321.091	323.097	87.0328	2.00625	99512.5	1	1	18
312	721.17	614.233	616.239	380.175	2.0058	9450	1	1	9
313	722.45	660.149	662.157	426.09	2.00831	6610	1	1	8
314	724.122	335.142	337.149	101.084	2.00632	49275	1	1	20
315	726.663	367.079	369.085	133.02	2.00591	185845	1	1	4
316	727.18	447.104	449.111	426.091	2.00692	877000	2	2	9
317	727.46	783.178	785.183	549.12	2.00497	6100	1	1	2
318	727.513	578.215	580.22	344.157	2.0046	13280	1	1	2
319	728.14	377.108	379.113	286.099	2.00498	6090	2	2	12
320	730.1	457.165	459.172	223.106	2.00743	30800	1	1	20
321	730.32	641.25	643.257	407.192	2.00671	46400	1	1	4
322	734.502	409.144	411.15	175.086	2.00638	834750	1	1	41
323	734.698	527.199	529.205	293.14	2.00666	91412.5	1	1	10
324	736.067	508.182	510.189	274.124	2.00652	139066	1	1	1
325	736.406	335.142	337.149	101.084	2.00669	50306.2	1	1	20
326	736.762	585.22	587.226	351.161	2.00663	507248	1	1	3
327	737.725	422.173	424.18	188.115	2.00698	27056.2	1	1	23
328	738.865	641.258	643.265	407.2	2.00647	11100	1	1	1
329	739.11	469.158	471.165	470.199	2.00727	9060	2	2	5
330	739.749	367.079	369.085	133.02	2.00608	194884	1	1	4
331	740.65	479.174	481.181	245.116	2.00665	9580	1	1	7
332	740.86	395.128	397.134	161.07	2.00627	423375	1	1	48
333	741.29	447.104	449.111	426.092	2.00661	337000	2	2	9
334	742.775	676.272	678.278	442.214	2.0059	96675	1	1	3
335	742.8	448.104	450.11	428.091	2.00631	76550	2	2	2
336	747.395	438.149	440.155	204.091	2.00608	369203	1	1	11
337	747.692	415.111	417.117	362.105	2.00603	9695	2	2	3
338	747.78	396.137	398.144	324.157	2.00659	3.17692e+06	2	2	9
339	748.2	397.138	399.144	326.16	2.0063	713000	2	2	2
340	748.479	629.21	633.223	162.101	4.01235	28743.8	1	2	15
341	750.366	614.23	616.237	380.172	2.00704	29296.9	1	1	12
342	750.432	376.132	378.139	142.074	2.00637	26237.5	1	1	13
343	754.577	508.181	510.189	274.123	2.00735	16000	1	1	2
344	755.02	812.33	814.339	578.272	2.00854	8675	1	1	1
345	755.279	400.086	402.092	166.028	2.0055	44934.4	1	1	18
346	756.495	362.101	364.107	256.086	2.00569	7800	2	2	11
347	756.999	547.143	549.15	313.084	2.00715	11715	1	1	11
348	762.092	335.142	337.149	101.084	2.00651	70340.6	1	1	20
349	762.22	624.252	626.258	390.194	2.00643	12300	1	1	4
350	763.81	456.157	458.161	222.099	2.00399	12300	1	1	23
351	764.25	464.174	466.18	230.116	2.00562	12400	1	1	9
352	765.755	381.148	383.155	147.09	2.00618	207281	1	1	39
353	766.89	319.112	321.117	85.0536	2.00553	112100	1	1	16
354	768.187	477.181	479.188	243.123	2.00634	54691.4	1	1	8
355	768.395	526.164	528.171	292.106	2.00695	20562.5	1	1	14
356	772.954	452.184	454.192	218.126	2.00752	12081.2	1	1	6
357	776.08	527.199	529.206	293.141	2.00707	13200	1	1	5
358	776.147	454.197	456.205	220.139	2.00823	10548.8	1	1	1
359	778.605	409.144	411.15	175.086	2.00633	5070000	1	1	41
360	781.51	860.383	862.391	626.324	2.00783	6760	1	1	7
361	781.899	335.142	337.149	101.084	2.00688	99600	1	1	20
362	782.16	477.181	479.187	243.123	2.00566	11300	1	1	8
363	784.3	469.184	471.19	470.251	2.00582	5370	2	2	8
364	784.406	321.116	323.123	174.115	2.00656	726929	2	2	5
365	784.7	426.121	428.127	192.062	2.00631	30900	1	1	36
366	785.164	393.137	395.143	318.157	2.00648	287482	2	2	3
367	788.472	452.184	454.191	218.126	2.00687	31443.8	1	1	6
368	790.205	458.074	460.08	224.016	2.00552	8630	1	1	3
369	792.25	680.067	682.077	446.008	2.00978	23000	1	1	3
370	792.715	448.19	450.197	214.132	2.00632	14950	1	1	7
371	793.25	351.102	353.111	117.044	2.00837	17700	1	1	1
372	795.39	392.129	394.137	316.142	2.00774	39000	2	2	3
373	796.294	592.226	594.234	358.168	2.00734	17900	1	1	1
374	797.265	383.13	385.134	149.071	2.00475	26300	1	1	7
375	798.445	458.177	460.183	224.118	2.0063	23025	1	1	10
376	799.33	335.143	337.149	101.084	2.00655	11100	1	1	20
377	802.456	360.102	362.11	126.044	2.00778	1.39894e+06	1	1	14
378	802.613	311.084	313.091	154.052	2.00669	625969	2	2	2
379	805.989	371.633	373.64	275.15	2.00693	24234.1	2	2	13
380	807.822	399.139	401.145	165.08	2.00633	6.77398e+06	1	1	48
381	810.68	592.227	594.233	358.168	2.00611	18078.1	1	1	2
382	819.61	453.135	455.138	219.076	2.00369	13650	1	1	41
383	821.188	365.154	367.16	131.096	2.00635	7231250	1	1	36
384	827.89	815.305	817.316	581.247	2.0108	14550	1	1	19
385	828.22	731.285	733.292	497.227	2.00726	14700	1	1	1
386	828.28	727.258	731.274	260.149	4.01582	12700	1	2	1
387	829.56	729.273	733.288	262.164	4.0143	16200	1	2	2
388	829.88	377.117	379.123	143.058	2.00635	101000	1	1	25
389	837.178	365.154	367.16	131.095	2.0064	1.11036e+07	1	1	36
390	843.36	392.147	394.153	316.178	2.00582	12500	2	2	3
391	843.548	423.158	425.164	189.1	2.0058	15175	1	1	28
392	846.221	381.094	383.1	147.036	2.00593	173772	1	1	4
393	849.58	681.311	683.317	447.252	2.00583	13700	1	1	7
394	861.13	307.112	309.119	73.0532	2.00702	486000	1	1	18
395	862.236	377.105	379.112	286.094	2.00701	34981.2	2	2	9
396	862.62	397.126	399.131	163.067	2.0055	15900	1	1	5
397	862.654	403.144	405.15	338.171	2.00676	45587.5	2	2	7
398	862.942	612.268	616.281	145.158	4.01287	55600	1	2	3
399	864.416	539.191	541.197	305.133	2.00648	28775	1	1	7
400	866.679	335.107	337.113	101.048	2.0063	172125	1	1	29
401	867.32	597.117	599.121	363.058	2.00484	37600	1	1	24
402	867.4	626.283	630.295	159.173	4.01272	6790	1	2	2
403	867.75	322.074	324.08	88.016	2.00607	19650	1	1	30
404	870.467	442.164	444.171	208.105	2.00692	19975	1	1	3
405	871.61	300.086	302.093	132.056	2.00671	9500	2	2	8
406	872.61	309.584	311.588	151.051	2.00469	13000	2	2	11
407	873.337	549.163	551.169	315.104	2.00628	10920	1	1	21
408	873.426	344.142	346.148	110.084	2.00627	31025	1	1	3
409	875.126	404.2	406.206	170.142	2.00566	38621.9	1	1	4
410	876.587	320.654	322.66	173.191	2.00649	39325	2	2	3
411	876.64	531.153	533.161	297.095	2.0073	10400	1	1	8
412	876.795	373.627	375.631	279.136	2.00471	16400	2	2	1
413	881.41	531.16	533.168	297.102	2.00807	146000	1	1	3
414	882.636	532.205	534.212	298.146	2.00718	14425	1	1	2
415	883.235	555.152	557.157	321.093	2.00576	231500	1	1	1
416	883.892	641.338	643.345	407.28	2.00679	389486	1	1	4
417	886.9	311.142	313.148	77.0835	2.00658	32300	1	1	6
418	887.711	577.158	579.164	343.1	2.00606	28050	1	1	15
419	888.217	416.117	418.122	182.059	2.00521	12350	1	1	45
420	892.63	612.267	616.28	145.158	4.01283	15275	1	2	3
421	892.893	629.211	633.224	162.101	4.01309	43625	1	2	15
422	893.52	547.156	549.163	313.097	2.00778	113909	1	1	1
423	893.58	462.206	464.211	228.148	2.00548	21412.5	1	1	3
424	894.269	575.153	577.159	341.094	2.00651	157531	1	1	17
425	898.523	307.095	309.101	146.074	2.00598	37775	2	2	10
426	898.761	296.096	298.101	62.0373	2.00573	36037.5	1	1	19
427	901.44	355.071	357.077	242.026	2.0056	25100	2	2	1
428	901.654	377.106	379.113	286.095	2.00714	14887.5	2	2	3
429	902.66	577.16	579.163	343.102	2.00264	22900	1	1	16
430	902.75	354.071	356.078	240.026	2.00653	182000	2	2	3
431	903.66	547.153	549.161	313.095	2.00832	25900	1	1	7
432	905.14	553.148	555.15	319.089	2.00244	36900	1	1	8
433	905.492	387.101	389.106	153.042	2.00592	48837.5	1	1	20
434	905.67	630.221	632.227	396.163	2.00602	7580	1	1	16
435	905.905	408.195	410.202	174.137	2.00629	32318.8	1	1	9
436	905.979	363.138	365.145	129.08	2.00643	3792500	1	1	30
437	909.117	385.12	387.127	151.062	2.00657	239100	1	1	1
438	911.641	612.268	616.28	145.158	4.01241	50187.5	1	2	3
439	911.76	549.163	551.17	315.105	2.00607	36300	1	1	25
440	913.072	375.606	377.611	283.095	2.00556	145594	2	2	5
441	913.705	311.084	313.091	154.052	2.00668	564250	2	2	2
442	914.91	368.116	370.123	268.116	2.00695	29650	2	2	11
443	915.528	419.107	421.113	185.049	2.00583	19150	1	1	1
444	918.93	553.149	555.152	319.091	2.00274	15400	1	1	8
445	920.46	547.156	549.162	313.097	2.00655	51000	1	1	1
446	922.457	377.105	379.113	286.093	2.00759	28931.2	2	2	9
447	922.66	581.141	585.156	114.031	4.01556	6650	1	2	28
448	927.44	502.097	504.104	268.038	2.00723	19862.5	1	1	8
449	928.087	496.19	498.197	262.131	2.00673	18156.2	1	1	6
450	929.061	393.148	395.154	159.089	2.00658	33403.1	1	1	42
451	931.874	335.622	337.629	203.128	2.00653	24718.8	2	2	11
452	931.965	431.126	433.131	197.067	2.00529	20250	1	1	39
453	932.565	349.62	351.626	231.123	2.00659	39337.5	2	2	5
454	938.4	411.105	413.112	177.046	2.00734	8470	1	1	16
455	938.696	330.127	332.133	96.0687	2.00601	38465.6	1	1	7
456	938.75	369.108	371.114	270.099	2.00596	15325	2	2	2
457	939.307	531.152	533.159	297.094	2.00656	28612.5	1	1	5
458	940.815	502.097	504.104	268.039	2.00736	17362.5	1	1	8
459	946.263	588.115	590.121	354.057	2.00561	22850	1	1	4
460	946.41	376.117	378.122	284.117	2.00532	5010	2	2	2
461	948.03	612.266	616.279	145.157	4.01318	11100	1	2	3
462	949.05	354.102	356.11	240.088	2.0072	5845	2	2	5
463	949.68	396.194	398.201	162.136	2.00716	14300	1	1	5
464	949.914	351.138	353.145	117.08	2.00659	612125	1	1	38
465	951.93	473.138	475.144	239.079	2.00649	62000	1	1	17
466	952.267	395.11	397.115	161.051	2.00552	177273	1	1	4
467	952.495	373.625	375.631	279.132	2.00677	17275	2	2	15
468	952.805	531.152	533.159	297.094	2.00647	19200	1	1	5
469	954.457	975.427	977.434	741.369	2.00663	66403.1	1	1	1
470	954.695	410.21	412.216	176.152	2.00575	16000	1	1	3
471	957.72	350.646	352.653	233.176	2.00643	42431.2	2	2	2
472	961.595	336.098	338.103	204.08	2.00506	12000	2	2	2
473	961.716	384.149	386.155	300.182	2.00614	26781.2	2	2	1
474	962.695	547.154	549.162	313.096	2.0082	16862.5	1	1	5
475	963.36	406.164	408.171	344.211	2.00679	10100	2	2	1
476	964.433	652.271	654.279	418.212	2.00809	85325	1	1	6
477	965.82	549.162	551.168	315.104	2.00644	12750	1	1	22
478	965.91	638.283	640.283	404.224	2.00042	14600	1	1	3
479	966.436	423.161	425.167	189.102	2.00597	941125	1	1	2
480	966.8	468.216	470.222	234.158	2.00607	17025	1	1	3
481	966.82	501.115	505.128	34.0056	4.01336	60559.4	1	2	8
482	966.877	368.1	370.106	268.083	2.00673	61681.2	2	2	19
483	967.622	288.573	290.579	109.029	2.00618	8277.5	2	2	1
484	967.71	369.104	371.11	270.091	2.00672	16900	2	2	9
485	967.73	658.327	660.328	424.269	2.00067	8040	1	1	13
486	967.855	413.153	415.162	179.095	2.00874	26650	1	1	27
487	969.36	405.136	407.144	342.156	2.00766	6730	2	2	10
488	970.528	439.136	441.144	205.078	2.00804	19925	1	1	9
489	971.727	311.593	313.6	155.069	2.00682	77993.8	2	2	14
490	972.102	652.289	654.293	418.231	2.00402	9550	1	1	2
491	972.438	680.288	682.295	446.23	2.00657	50625	1	1	6
492	975.735	371.632	373.639	275.148	2.00602	10237.5	2	2	10
493	976.01	547.154	549.163	313.096	2.0086	13400	1	1	5
494	976.263	654.314	658.327	187.205	4.01347	15910	1	2	3
495	977.062	342.63	344.637	217.144	2.00657	14375	2	2	6
496	978.92	656.314	658.326	422.256	2.01205	11700	1	1	5
497	980.38	346.099	348.106	224.081	2.00688	10500	2	2	36
498	980.965	300.104	302.11	132.091	2.00657	40300	2	2	17
499	984.415	421.153	423.161	187.095	2.0077	14750	1	1	7
500	986.491	659.25	661.256	425.192	2.00602	25250	1	1	11
501	987.45	494.689	496.695	521.261	2.00605	6890	2	2	8
502	990.39	395.123	397.131	322.129	2.00837	7260	2	2	8
503	993.03	553.143	555.15	319.085	2.00635	12250	1	1	4
504	994.46	297.578	299.585	127.039	2.00654	27500	2	2	6
505	995.985	322.117	324.124	176.118	2.00661	10247.5	2	2	1
506	1001.48	488.178	490.183	254.119	2.00548	33175	1	1	5
507	1004.47	445.153	447.16	211.095	2.00686	19300	1	1	29
508	1004.84	407.164	409.17	173.106	2.00623	44875	1	1	29
509	1005.29	379.169	381.174	145.111	2.00498	26940.6	1	1	19
510	1006.47	363.618	365.625	259.119	2.00677	8575	2	2	12
511	1006.92	372.09	374.097	138.032	2.00629	106109	1	1	19
512	1014.64	441.148	443.154	207.089	2.00623	35781.2	1	1	25
513	1016.48	427.132	429.138	193.074	2.00583	18200	1	1	24
514	1019.82	312.085	314.091	156.053	2.0063	839000	2	2	17
515	1020.29	311.084	313.091	154.052	2.00663	6781875	2	2	1
516	1022.5	308.113	310.12	148.11	2.00643	904500	2	2	2
517	1026.08	457.141	459.148	223.083	2.00675	15000	1	1	28
518	1028.54	407.164	409.17	173.106	2.00622	146750	1	1	29
519	1030.24	760.268	762.275	526.21	2.00686	84600	1	1	3
520	1034.98	413.154	415.16	179.096	2.00581	573781	1	1	27
521	1037.61	347.112	349.12	226.108	2.00724	13122.2	2	2	12
522	1038.06	485.175	487.181	251.117	2.00608	8820	1	1	5
523	1038.57	738.22	740.221	504.162	2.00042	12800	1	1	2
524	1039.57	367.608	369.615	267.099	2.00734	318000	2	2	45
525	1041.76	320.635	322.642	173.154	2.0064	22450	2	2	5
526	1042.57	356.1	358.104	244.083	2.00472	7290	2	2	13
527	1043.27	355.62	357.627	243.123	2.00706	10045	2	2	8
528	1045.56	477.217	479.224	243.158	2.00793	19637.5	1	1	2
529	1047.28	375.605	377.612	283.094	2.00654	88753.1	2	2	40
530	1048.45	409.125	411.131	175.067	2.00536	65331.8	1	1	6
531	1048.79	366.101	368.107	132.043	2.00535	34500	1	1	69
532	1056.57	444.159	446.166	210.101	2.00666	13612.5	1	1	23
533	1058.57	355.638	357.644	243.159	2.00585	23968.8	2	2	2
534	1059.9	424.226	426.231	190.167	2.00561	10000	1	1	1
535	1060.28	652.299	656.311	185.189	4.01247	50459.4	1	2	1
536	1061.25	728.242	730.249	494.184	2.00663	198156	1	1	3
537	1061.46	347.143	349.147	113.084	2.00415	7780	1	1	16
538	1063.17	379.17	381.176	145.112	2.00639	2143750	1	1	19
539	1063.7	341.111	343.12	214.106	2.00847	21950	2	2	1
540	1066.14	389.128	391.134	155.07	2.00582	90837.5	1	1	14
541	1067.29	312.595	314.601	157.073	2.00651	563481	2	2	28
542	1069.45	934.414	936.422	700.356	2.00849	5980	1	1	5
543	1070.3	299.096	301.103	130.075	2.00673	22215.6	2	2	18
544	1070.56	339.097	341.104	210.076	2.00718	11268.8	2	2	16
545	1077.06	455.164	457.17	221.105	2.00591	26306.2	1	1	16
546	1077.31	347.089	349.096	226.062	2.0067	667375	2	2	11
547	1078.28	356.094	358.101	244.072	2.00729	28068.8	2	2	32
548	1083.48	348.115	350.12	228.113	2.00461	7400	2	2	2
549	1086.58	382.109	384.115	296.102	2.0059	7532.5	2	2	18
550	1091.08	429.152	431.158	195.094	2.00617	17262.5	1	1	1
551	1093.29	411.141	413.147	177.083	2.00556	130438	1	1	6
552	1093.63	389.119	391.125	310.122	2.00609	6790	2	2	6
553	1094.23	372.173	374.18	138.115	2.00691	11743.8	1	1	3
554	1096.58	341.641	343.647	215.165	2.00644	17750	2	2	5
555	1097.31	487.152	489.159	253.094	2.00647	16150	1	1	9
556	1097.57	761.315	763.322	527.257	2.00629	5790	1	1	12
557	1098.63	759.309	761.313	525.251	2.00424	21400	1	1	7
558	1098.67	541.143	543.147	307.085	2.00413	9710	1	1	14
559	1100.11	356.094	358.101	244.071	2.00723	40293.8	2	2	29
560	1100.38	298.088	300.095	128.059	2.00717	538375	2	2	16
561	1104.59	335.108	337.114	202.1	2.00612	16400	2	2	1
562	1107.66	421.18	423.186	187.122	2.00603	299000	1	1	22
563	1109.55	466.179	468.185	232.121	2.00516	11031.2	1	1	6
564	1110.73	356.094	358.101	244.072	2.00668	248125	2	2	32
565	1117.69	328.134	330.142	188.151	2.00786	9650	2	2	4
566	1124.66	423.142	425.147	189.084	2.00414	8380	1	1	1
567	1128.03	326.635	328.641	185.154	2.00586	13700	2	2	2
568	1129.61	321.163	323.17	87.1045	2.00684	148638	1	1	10
569	1130.88	348.114	350.123	228.112	2.0085	32100	2	2	8
570	1134.33	328.117	330.124	188.118	2.00643	57015.6	2	2	24
571	1140.53	386.107	388.114	152.048	2.00707	8720	1	1	31
572	1143.63	528.162	532.175	61.0531	4.01303	52643.8	1	2	15
573	1145.62	321.109	323.115	174.102	2.00609	35200	2	2	35
574	1146.24	532.249	534.255	298.19	2.00667	15350	1	1	18
575	1148.74	349.158	351.163	115.099	2.00562	10925	1	1	21
576	1150.7	336.114	338.121	204.112	2.00686	7110	2	2	11
577	1153.1	292.106	294.112	116.095	2.00635	41381.2	2	2	9
578	1153.63	379.169	381.175	145.111	2.00596	379156	1	1	19
579	1156.44	487.1	489.105	253.042	2.00519	20350	1	1	3
580	1161.51	368.102	370.105	268.087	2.00337	83175	2	2	9
581	1161.6	353.096	355.102	119.037	2.0061	35100	1	1	7
582	1176.41	335.64	337.648	203.164	2.00716	56400	2	2	4
583	1176.71	338.088	340.094	104.03	2.0053	9610	1	1	3
584	1183.58	693.167	697.182	226.058	4.01466	12700	1	2	18
585	1187.8	346.085	348.091	112.027	2.00572	32000	1	1	9
586	1190.73	711.132	715.15	244.023	4.01758	10500	1	2	2
587	1190.8	311.085	313.093	154.054	2.00812	1.10219e+06	2	2	1
588	1196.4	427.169	429.175	193.111	2.00578	371219	1	1	13
589	1197.19	472.225	474.233	238.167	2.00755	7365	1	1	1
590	1197.95	343.086	345.092	109.028	2.00556	12800	1	1	3
591	1198.6	359.105	361.111	125.047	2.00575	39700	1	1	15
592	1199.57	335.167	337.174	202.218	2.00635	20450	2	2	1
593	1202.35	327.091	329.098	186.065	2.00705	36100	2	2	16
594	1203.83	397.158	399.164	163.1	2.00512	11875	1	1	16
595	1204.07	355.064	357.071	242.012	2.00668	12952.5	2	2	7
596	1215.62	403.144	405.15	169.086	2.00632	11850	1	1	11
597	1219.76	355.064	357.07	242.011	2.00626	8680	2	2	7
598	1225.89	325.098	327.105	182.079	2.00673	661500	2	2	35
599	1226.6	324.597	326.603	181.077	2.00665	5.63555e+06	2	2	4
600	1227.31	414.124	416.13	180.066	2.00658	35853.1	1	1	10
601	1229.02	373.086	375.091	139.027	2.00501	15050	1	1	9
602	1229.78	386.106	388.111	152.048	2.00527	26500	1	1	31
603	1237.79	363.174	365.18	129.115	2.00611	30328.1	1	1	10
604	1238.67	335.178	337.186	101.12	2.00726	444575	1	1	1
605	1239.81	515.211	517.217	562.306	2.00607	9200	2	2	1
606	1240.64	800.385	802.394	566.327	2.00809	15000	1	1	4
607	1243.7	378.083	380.089	144.024	2.00619	27225	1	1	1
608	1249.22	363.173	365.18	129.115	2.00677	13150	1	1	10
609	1252.74	335.179	337.186	101.121	2.00702	576656	1	1	1
610	1263.07	437.173	439.181	203.115	2.00739	30275	1	1	22
611	1263.47	335.178	337.185	101.12	2.00653	57878.1	1	1	1
612	1269.01	373.123	375.129	278.129	2.00615	17950	2	2	17
613	1278.93	681.294	683.299	447.236	2.00523	16312.5	1	1	6
614	1280.03	345.625	347.631	223.133	2.00619	11600	2	2	2
615	1281.84	690.791	692.798	913.465	2.00701	26420	2	2	1
616	1282.81	275.085	277.092	82.0538	2.0068	16537.5	2	2	4
617	1282.9	690.459	692.465	456.401	2.00593	30137.5	1	1	12
618	1284.22	598.101	600.105	364.043	2.0037	11340	1	1	6
619	1286.04	331.56	333.567	195.004	2.00723	10300	2	2	3
620	1289.1	327.109	329.116	186.102	2.00715	19775	2	2	15
621	1294.28	321.128	323.134	174.139	2.00663	143875	2	2	9
622	1298.78	302.078	304.086	136.04	2.00803	6970	2	2	10
623	1302.79	356.595	358.602	245.074	2.00664	159528	2	2	6
624	1303.74	357.595	359.602	247.073	2.00708	17300	2	2	1
625	1306.2	435.194	437.2	201.136	2.00583	23762.5	1	1	12
626	1308.32	354.116	356.122	120.058	2.00622	190583	1	1	13
627	1310.36	331.604	333.611	195.091	2.00677	50993.8	2	2	30
628	1310.46	367.147	369.154	133.089	2.00678	14675	1	1	6
629	1311.31	488.152	490.159	254.093	2.00696	21775	1	1	8
630	1313.29	325.609	327.616	183.102	2.00634	26087.5	2	2	8
631	1314.07	284.601	286.607	101.085	2.00586	10300	2	2	20
632	1315.72	973.283	975.284	739.225	2.0006	10300	1	1	1
633	1320.01	354.117	356.124	120.058	2.00689	821875	1	1	13
634	1325.81	338.593	340.6	209.07	2.00689	24400	2	2	42
635	1331.07	345.601	347.608	223.086	2.00652	34637.5	2	2	30
636	1332.36	527.255	529.263	293.197	2.00772	22565.6	1	1	7
637	1333.21	515.13	519.143	48.0208	4.01294	10442.5	1	2	18
638	1335.09	573.244	575.251	339.186	2.00628	10400	1	1	1
639	1336.95	349.194	351.2	115.135	2.0063	22750	1	1	1
640	1337.59	630.934	632.939	793.751	2.00569	9965	2	2	1
641	1343.15	631.1	633.106	794.083	2.00654	30002.5	2	2	1
642	1346.9	353.074	355.081	238.032	2.00655	12300	2	2	11
643	1349.36	630.933	632.94	793.75	2.00649	58481.2	2	2	1
644	1350.47	331.604	333.611	195.091	2.00693	344250	2	2	30
645	1352.47	297.59	299.597	127.064	2.00694	57312.5	2	2	20
646	1353.41	577.157	581.169	110.048	4.01243	21537.5	1	2	8
647	1357.84	886.245	888.255	1304.37	2.00937	7980	2	2	2
648	1358.13	352.609	354.615	237.102	2.00612	28287.5	2	2	11
649	1359.12	994.27	996.279	760.212	2.00839	11500	1	1	1
650	1361.39	588.263	590.27	354.204	2.00716	14937.5	1	1	10
651	1361.52	287.081	289.087	106.045	2.00607	7935	2	2	1
652	1362.27	308.582	310.589	149.046	2.00788	29494	2	2	17
653	1363.36	313.593	315.6	159.069	2.00684	37796.9	2	2	10
654	1364.45	305.571	307.578	143.026	2.00666	152469	2	2	2
655	1367.48	577.157	581.17	110.048	4.01339	27553.1	1	2	8
656	1375.96	344.106	346.112	110.048	2.00629	33750	1	1	8
657	1378.47	328.135	330.142	188.153	2.00714	9450	2	2	4
658	1379.14	504.183	506.19	270.125	2.00662	19950	1	1	11
659	1385.41	302.078	304.085	136.039	2.00703	36912.5	2	2	10
660	1388.4	772.328	774.336	538.27	2.00781	28100	1	1	7
661	1388.47	515.131	519.144	48.0215	4.01363	304875	1	2	18
662	1394.29	847.321	851.342	380.212	4.02023	2.09656e+06	1	2	4
663	1394.42	612.267	616.281	145.158	4.01364	55681.2	1	2	3
664	1398.37	454.241	456.247	220.183	2.00645	222864	1	1	3
665	1400.16	826.369	828.373	592.311	2.00429	7090	1	1	5
666	1405.36	363.21	365.217	129.152	2.00661	383521	1	1	1
667	1408.01	331.09	333.097	194.063	2.00708	10671.2	2	2	1
668	1412.89	620.248	622.251	386.19	2.00265	24200	1	1	5
669	1414.54	947.228	949.232	713.17	2.00406	11600	1	1	3
670	1415.41	297.081	299.087	126.046	2.00597	34593.8	2	2	3
671	1416.03	338.612	340.619	209.107	2.0069	359375	2	2	18
672	1418.7	760.134	762.14	526.076	2.00622	23725	1	1	2
673	1418.87	760.336	762.342	526.278	2.0055	14600	1	1	17
674	1419.43	950.417	952.426	716.358	2.00909	16750	1	1	2
675	1420.81	573.471	575.478	678.825	2.00689	57300	2	2	1
676	1422.21	757.346	759.355	523.288	2.00823	6500	1	1	9
677	1422.72	479.202	481.207	245.144	2.00476	8210	1	1	1
678	1422.84	908.42	910.422	674.362	2.00203	6650	1	1	5
679	1422.91	573.219	575.228	339.161	2.0089	42200	1	1	2
680	1425.7	323.606	325.613	179.096	2.00672	12752.5	2	2	27
681	1427.03	327.127	329.134	186.136	2.00728	28450	2	2	4
682	1427.52	331.089	333.097	194.062	2.00718	19534.4	2	2	5
683	1436.73	426.173	428.18	192.115	2.00674	83601.6	1	1	10
684	1437.72	319.573	321.58	171.03	2.00622	42131.2	2	2	2
685	1439.19	361.073	363.079	254.028	2.00607	36500	2	2	5
686	1442.11	623.221	625.227	389.162	2.00603	61775	1	1	23
687	1443.07	293.596	295.603	119.074	2.00704	20775	2	2	11
688	1446.22	822.362	824.368	588.304	2.00605	55662.5	1	1	8
689	1449.13	832.234	834.233	598.176	1.99872	25500	1	1	4
690	1449.94	854.216	856.216	620.158	1.99956	18700	1	1	1
691	1461.5	483.267	485.274	249.209	2.00732	35800	1	1	1
692	1465.87	865.198	867.206	631.14	2.00797	7260	1	1	1
693	1469.02	620.236	622.242	386.178	2.00577	30000	1	1	15
694	1469.04	923.43	925.437	689.371	2.00696	40225	1	1	3
695	1472.09	623.221	625.227	389.163	2.00636	109919	1	1	14
696	1474.49	826.364	828.372	592.306	2.00726	7655	1	1	3
697	1476.06	621.158	625.172	154.048	4.01374	21375	1	2	12
698	1483.37	792.317	794.318	558.259	2.00043	8260	1	1	12
699	1484.39	578.235	580.242	344.177	2.00638	53262.5	1	1	1
700	1486.25	669.325	673.338	202.216	4.01276	15800	1	2	1
701	1486.88	570.291	572.293	336.233	2.00216	11450	1	1	100
702	1492.33	485.21	487.216	251.152	2.00602	47225	1	1	5
703	1493.26	685.327	687.334	451.269	2.00664	11730	1	1	24
704	1497.86	456.219	458.227	222.161	2.00725	52984.4	1	1	2
705	1500.28	403.064	405.067	169.005	2.00387	41690.6	1	1	9
706	1506	468.22	470.226	234.161	2.00618	18230.3	1	1	4
707	1506.67	584.307	586.31	350.249	2.00231	9120	1	1	59
708	1506.91	759.351	761.355	525.293	2.00434	15900	1	1	9
709	1511.93	757.346	759.352	523.288	2.00601	36700	1	1	9
710	1513.8	735.344	737.35	501.286	2.00629	94962.5	1	1	28
711	1516.31	556.275	558.277	322.216	2.0024	9940	1	1	53
712	1520	865.2	867.209	631.141	2.00943	14050	1	1	1
713	1521.27	759.353	761.358	525.294	2.00491	24800	1	1	8
714	1523.31	711.342	713.352	477.283	2.00998	7930	1	1	25
715	1525.89	598.323	600.324	364.265	2.00125	9490	1	1	37
716	1527.2	348.117	350.123	228.117	2.00582	27250	2	2	2
717	1529	482.236	484.243	248.178	2.0065	239048	1	1	1
718	1531.21	584.189	586.195	350.131	2.00592	65250	1	1	15
719	1531.63	440.225	442.232	206.167	2.00658	289097	1	1	1
720	1532.61	761.358	763.368	527.3	2.00967	13400	1	1	16
721	1543.2	519.287	521.294	285.229	2.00659	23750	1	1	6
722	1549.9	533.34	535.347	299.282	2.00669	57257	1	1	14
723	1553.12	669.357	671.363	435.298	2.00651	6390	1	1	17
724	1566.31	535.355	537.362	301.297	2.00683	21875	1	1	8
725	1568.14	547.356	549.362	313.298	2.00573	14800	1	1	10
726	1569.01	454.24	456.246	220.182	2.00659	60752.3	1	1	3
727	1569.7	417.121	419.128	183.063	2.00697	60612.5	1	1	15
728	1569.99	666.368	668.374	432.31	2.00571	13950	1	1	4
729	1574.1	489.314	491.321	255.256	2.00634	104750	1	1	2
730	1580.99	515.329	517.335	281.271	2.00567	7580	1	1	4
731	1582.57	455.138	457.145	221.079	2.00715	512983	1	1	4
732	1602.43	687.345	689.35	453.287	2.00535	6765	1	1	22
733	1619.19	713.359	715.364	479.301	2.00503	21000	1	1	27
734	1620.14	517.345	519.351	283.287	2.00627	73725	1	1	10
735	1631.72	713.359	715.365	479.3	2.00626	19620	1	1	27
736	1634.05	575.35	577.357	341.292	2.00671	32300	1	1	16
737	1689.44	671.347	673.353	437.289	2.00596	7760	1	1	9
738	1707.69	671.349	673.352	437.29	2.00325	7600	1	1	9
739	1707.69	697.362	699.37	463.304	2.00794	5620	1	1	19
